# Supplementary material for: Whole-genome resequencing of temporally stratified samples reveals substantial loss of haplotype diversity in the highly inbred Scandinavian wolf population
Source: HighWire-hosted journal article supplement (doi:10.1101/gr.276070.121), 2022-02-08
Supplement: Supplemental_Fig_S2.pdf [file Supplemental_Fig_S2.pdf]

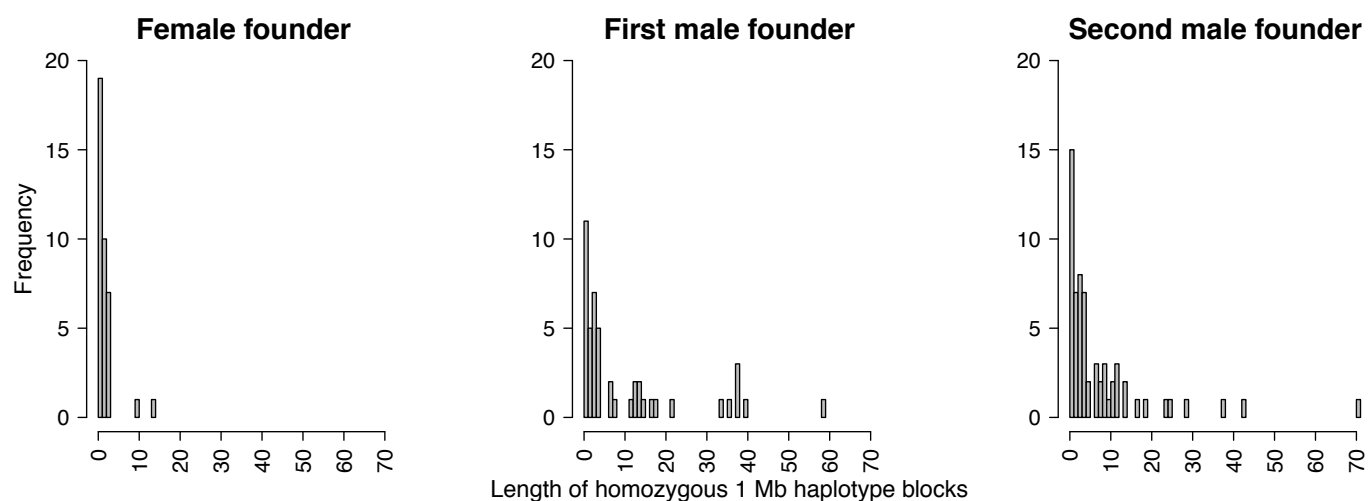

**Supplemental Figure S2.** Length distribution of the homozygous 1 Mb window blocks observed in three founder individuals of Scandinavian wolf population (x-axes represent the number of adjacent 1 Mb windows in a block).
