# Supplementary material for: Whole-genome resequencing of temporally stratified samples reveals substantial loss of haplotype diversity in the highly inbred Scandinavian wolf population
Source: HighWire-hosted journal article supplement (doi:10.1101/gr.276070.121), 2022-02-08
Supplement: Supplemental_Fig_S5.pdf [file Supplemental_Fig_S5.pdf]

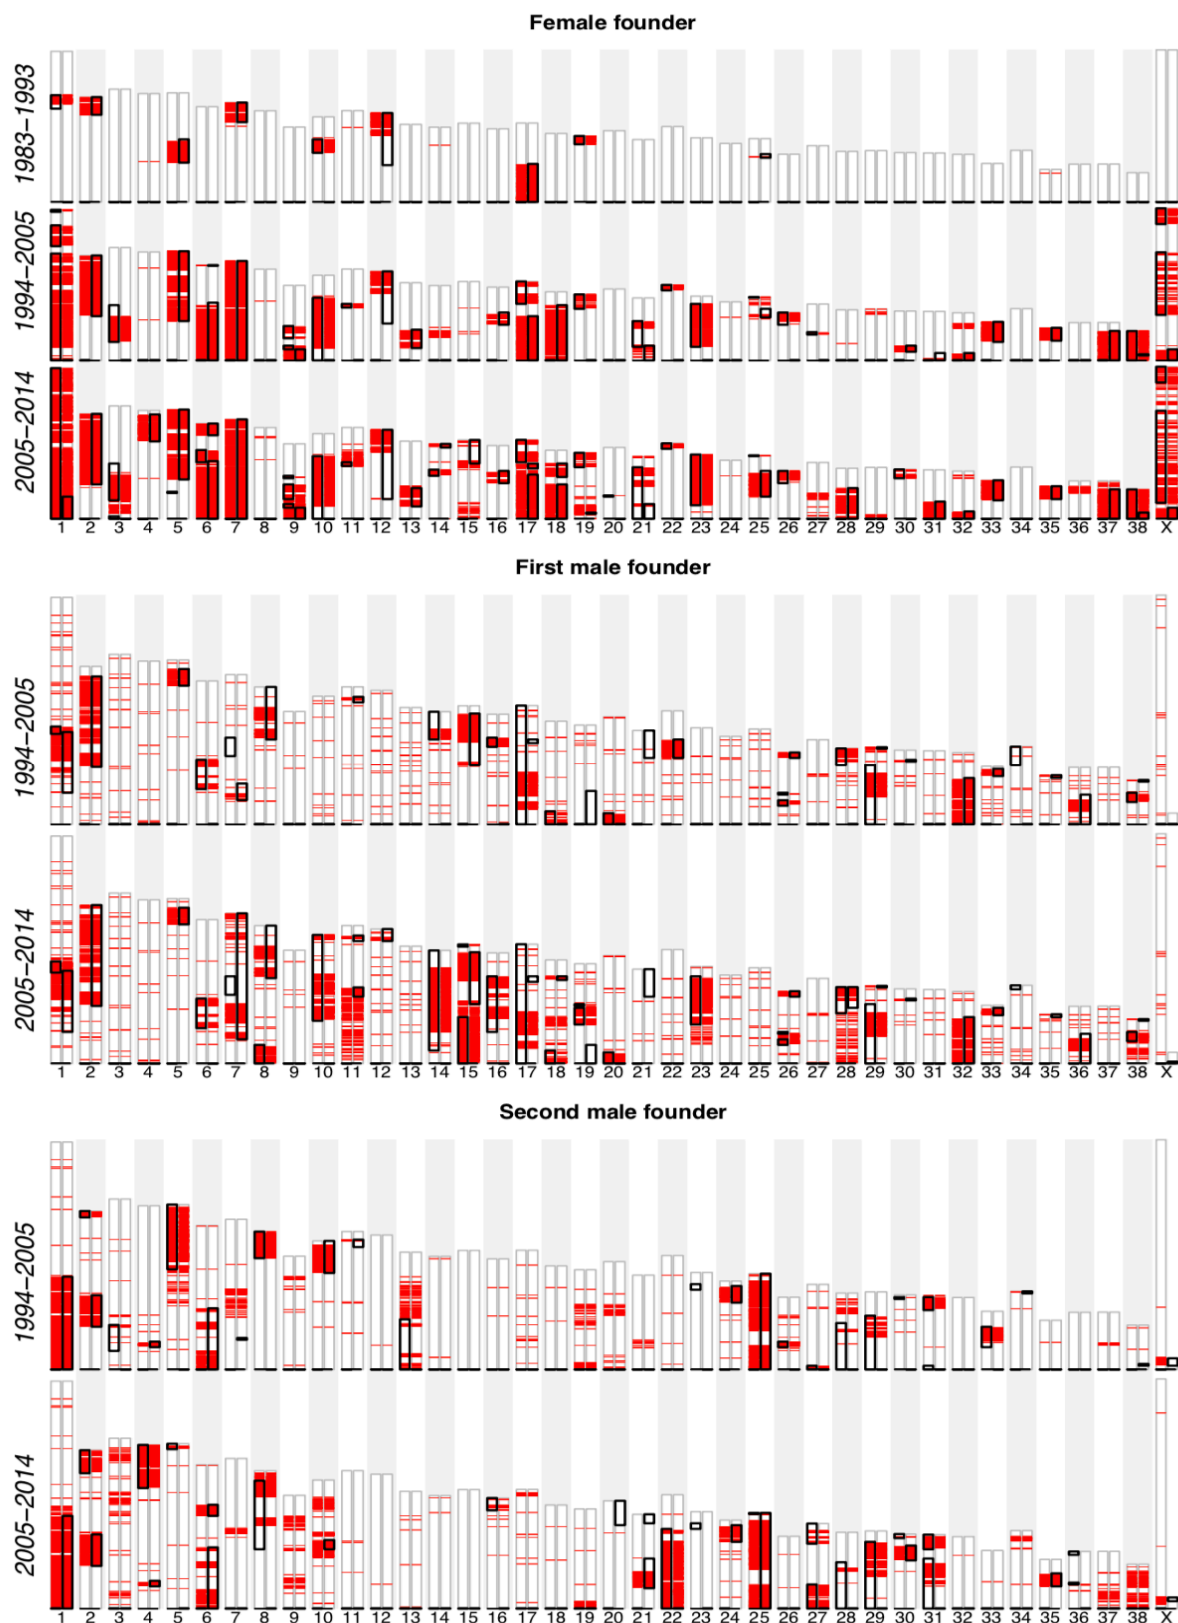

**Supplemental Figure S5.** Genomic distribution of lost 1 Mb haplotype blocks and individual SNP alleles. Haplotype blocks are displayed as black squares linked to a specific homologous chromosome, while individual SNP alleles are shown as red lines across the two homologous chromosomes. Genomic segments where no lost alleles are displayed within the haplotype blocks are those that are present in several founders, thus allele loss is being masked by other founder haplotypes.
