# Supplementary material for: Whole-genome resequencing of temporally stratified samples reveals substantial loss of haplotype diversity in the highly inbred Scandinavian wolf population
Source: HighWire-hosted journal article supplement (doi:10.1101/gr.276070.121), 2022-02-08
Supplement: Supplemental_Fig_S6.pdf [file Supplemental_Fig_S6.pdf]

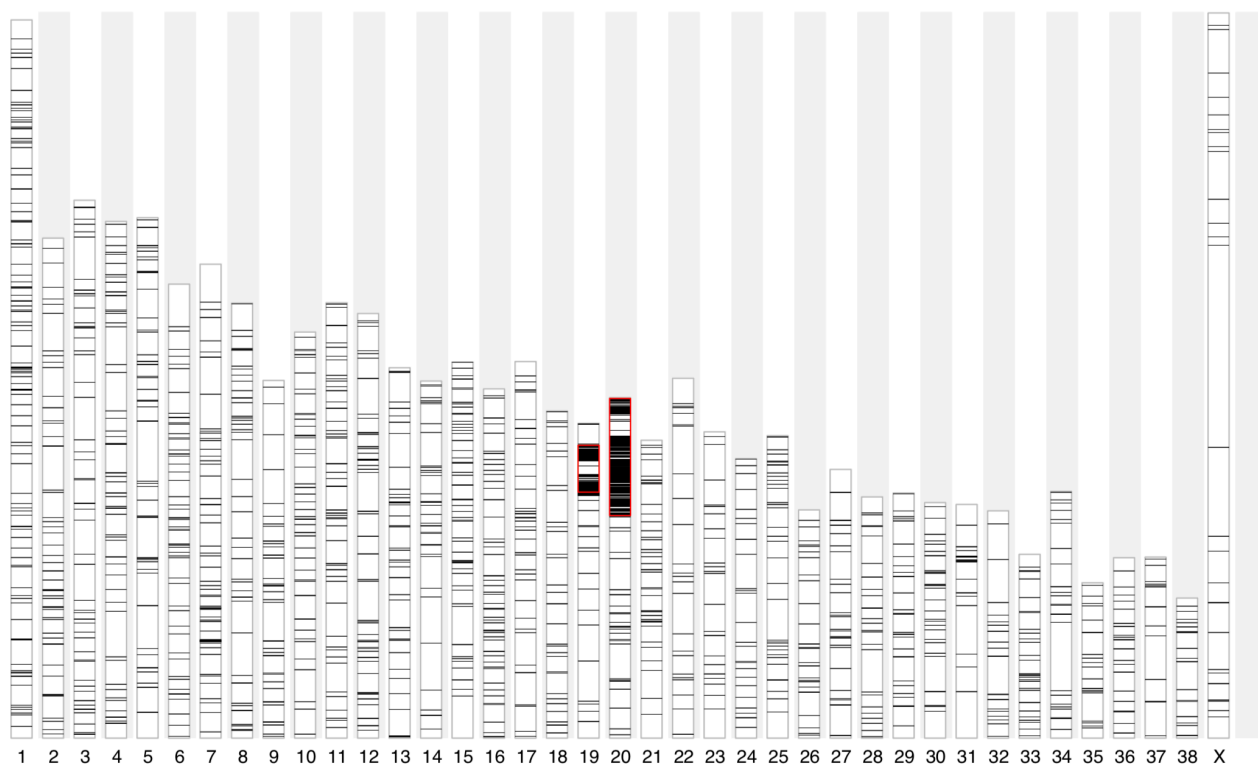

**Supplemental Figure S6.** Distribution of 3444 SNPs observed in the Scandinavian wolf population in 1994-2014, but not in 1983-993. Red squares indicate haplotype blocks of 1 Mb windows that were observed in F<sub>2</sub> offspring of the second male founder and black lines represent genomic distribution of SNPs.
