# Supplementary material for: Whole-genome resequencing of temporally stratified samples reveals substantial loss of haplotype diversity in the highly inbred Scandinavian wolf population
Source: HighWire-hosted journal article supplement (doi:10.1101/gr.276070.121), 2022-02-08
Supplement: Supplemental_File_S1.xlsx [file Supplemental_File_S1.xlsx]

## Sheet: Explanatory_info
Color code of the haplotypes:
F_2	Female founder haplotype 2
F_1	Female founder haplotype 1
M1_1	Male founder 1 haplotype 1
M1_2	Male founder 1 haplotype 2
M2_1	Male founder 2 haplotype 1
M2_2	Male founder 2 haplotype 2
Colour assignment of haplotypes was done in hierarchical order: all light yellow haplotypes were coloured first, golden haplotypes second, light green third, dark green forth, light blue fifth and dark blue sixth.
For example, all 1 Mb haplotypes of the female founder's chromosome-level haplotype 1 (dark yellow) identical to her haplotype 2 (light yellow) remained light yellow to highlighting genomic regions where female founder was homozygous.
Similarly, all 1 MB haplotypes of the first male founder's chromosome-level haplotype 1 (light green) identical to 1 Mb haplotypes of female founder remained light/dark yellow, highlighting regions of the first male founder identical to those of female founder.
Formating of manual curration:
	manually corrected switch errors
4	ID of a haplotype that has been assigned manually
Numbering:
Numbers in coloured cells represent ID's of the individually phased 1 MB haplotypes
7	founder haplotypes that could not be phased/inferred (discarded windows)
0	1 Mb haplotypes that could not be assigned (discarded windows)
NA	chromosome-level phasing failed
X	manually assigned haplotype that was not present in raw phasing results

## Sheet: chr1_1Mb
				window:	0	1	2	3	4	5	6	7	8	9	10	11	12	13	14	15	16	17	18	19	20	21	22	23	24	25	26	27	28	29	30	31	32	33	34	35	36	37	38	39	40	41	42	43	44
Female founder			1	D-85-01	4	2	14	19	11	3	31	2	24	3	11	32	26	33	27	37	6	35	39	16	20	24	5	13	23	34	23	14	7	33	23	17	10	8	34	18	4	23	1	21	15	6	35	9	11
			2	D-85-01	1	8	9	17	25	3	22	10	40	35	10	2	22	23	22	17	38	28	25	5	37	21	36	31	4	46	13	5	44	19	10	32	26	15	17	15	25	17	16	18	30	21	13	16	1
1983-1993	First male founder	F1 offspring	1	D-84-03	24	12	1	8	5	10	11	9	26	4	3	11	17	2	8	18	2	32	39	16	20	24	5	13	23	34	23	1	4	23	44	28	5	24	29	32	12	13	5	7	34	23	5	5	9
			2	D-84-03	1	8	9	17	25	3	22	10	40	36	11	32	26	33	27	37	6	35	39	16	20	24	5	13	23	34	23	14	7	33	23	17	10	8	34	18	4	23	1	21	15	6	35	9	11
			1	D-85-02	2	6	14	19	11	3	31	2	24	3	10	2	23	26	4	5	33	5	43	20	34	17	30	21	5	49	14	12	24	37	5	28	5	24	31	41	32	7	23	5	38	40	6	21	26
			2	D-85-02	1	8	9	17	25	3	22	10	40	35	10	2	22	23	22	17	38	28	25	5	37	21	36	31	4	46	13	5	44	19	10	32	26	15	17	15	25	17	16	18	30	21	13	16	1
			1	3-D-86-01	2	6	14	19	11	3	31	2	24	3	10	2	23	26	4	5	33	5	43	20	34	17	30	21	5	49	14	12	24	37	5	28	5	24	31	41	32	7	23	5	38	40	6	21	26
			2	3-D-86-01	1	8	9	17	25	3	22	10	40	35	10	2	22	23	22	17	38	28	25	5	37	21	36	31	4	46	13	5	44	19	10	32	26	15	17	15	25	17	16	18	30	21	13	16	1
		F2 offspring	1	4-D-89-01	1	8	9	17	25	3	23	2	24	3	10	2	23	26	4	5	33	5	43	20	34	17	30	21	5	49	14	12	24	37	5	28	5	24	31	41	32	7	23	5	38	40	6	21	26
			2	4-D-89-01	4	2	14	19	11	3	31	2	24	3	11	32	26	33	27	37	6	35	39	16	20	24	5	13	23	34	23	14	7	33	23	17	10	8	34	17	25	17	16	18	30	21	13	16	1
			1	5-D-91-01	2	6	14	19	11	3	31	2	24	3	10	2	23	26	4	5	33	5	43	20	34	17	30	21	5	49	14	12	24	37	5	28	5	24	31	41	32	7	23	5	38	40	6	21	26
			2	5-D-91-01	2	6	14	19	11	3	31	2	24	3	10	2	23	26	4	5	33	5	43	20	34	17	30	21	5	49	14	12	24	37	5	29	26	15	17	15	25	17	16	18	30	21	13	16	1
			1	16-D-89-03	2	6	14	19	11	3	31	2	24	3	10	2	23	26	4	5	33	5	43	20	34	17	30	21	5	49	14	12	24	39	10	32	26	15	17	15	25	17	16	18	30	21	13	16	1
			2	16-D-89-03	4	2	14	19	11	3	31	2	24	3	11	32	26	33	27	37	6	35	39	16	20	24	5	13	23	34	23	14	7	33	23	17	10	8	34	17	25	17	16	18	30	21	13	16	1
			1	17-D-92-05	2	6	14	19	11	3	31	2	24	3	10	2	23	26	4	5	33	5	43	20	34	17	30	21	5	49	14	12	24	37	5	28	5	24	31	41	32	7	23	5	38	40	6	21	26
			2	17-D-92-05	24	12	1	8	5	10	11	9	26	4	3	11	17	2	8	18	2	30	25	5	37	21	36	31	4	46	13	5	44	19	10	32	26	15	17	15	25	17	16	18	30	21	13	16	1
			1	30-D-93-02	1	8	9	17	25	3	22	10	40	35	10	1	17	2	8	18	2	32	39	16	20	24	5	13	23	34	23	1	4	23	44	28	5	24	29	31	32	7	23	5	38	40	6	21	26
			2	30-D-93-02	4	2	14	19	11	3	31	2	24	3	11	32	26	33	27	37	6	35	39	16	20	24	5	13	23	34	23	14	7	33	23	17	10	8	34	17	25	17	16	18	30	21	13	16	1
		F3 offspring	1	6-M-98-02	2	6	14	19	11	3	31	2	24	3	10	2	23	26	4	5	33	5	43	20	34	17	30	21	5	49	14	12	24	37	5	28	5	24	31	41	32	7	23	5	38	40	6	21	26
			2	6-M-98-02	24	12	1	8	5	10	11	9	26	4	3	11	17	2	8	18	2	30	25	5	37	21	36	31	4	46	13	5	44	19	10	32	26	15	17	15	25	17	16	18	30	21	13	16	1
			1	31-D-93-03	2	6	14	19	11	3	31	2	24	3	10	2	23	26	4	5	33	5	43	20	34	17	30	21	5	49	14	12	24	37	5	28	5	24	31	41	32	7	23	5	38	40	6	21	26
			2	31-D-93-03	1	8	9	17	25	3	22	10	40	35	10	2	22	23	22	5	33	5	43	20	34	17	30	21	5	49	14	12	24	37	5	28	5	24	31	41	32	7	23	5	38	40	6	21	26
			1	19-D-94-01	2	6	14	19	11	3	31	2	24	3	10	2	23	26	4	5	33	5	43	20	34	17	30	21	5	49	14	12	24	37	5	28	5	24	31	41	32	7	23	5	38	40	6	21	26
			2	19-D-94-01	2	6	14	19	11	3	31	2	24	3	10	2	23	26	4	5	33	5	43	20	34	17	30	21	5	49	17	5	44	19	10	32	26	15	17	15	25	17	16	18	30	21	13	16	1
			1	57-D-92-06	24	12	1	8	5	10	11	9	26	4	3	11	17	2	8	18	2	30	25	5	37	21	36	31	4	46	13	5	44	19	10	32	26	15	17	15	25	17	16	18	30	21	13	16	1
			2	57-D-92-06	1	8	9	17	25	3	22	10	40	35	10	2	22	23	22	17	38	28	25	5	37	21	36	31	4	46	13	5	44	19	10	32	26	15	17	15	25	17	16	18	30	21	13	17	26
	Second male founder	F1 offspring	1	94-D-92-01	32	16	18	3	20	4	25	21	4	29	1	36	36	45	11	32	36	23	47	25	1	1	9	29	13	9	34	1	1	37	1	1	2	27	1	35	2	1	11	1	18	4	2	2	7
			2	94-D-92-01	1	8	9	17	25	3	22	10	40	35	10	2	22	23	22	17	38	28	25	5	37	21	36	31	4	46	13	5	44	19	10	32	26	15	17	15	25	17	16	18	30	21	13	16	1
			1	59-D-96-01	1	8	9	17	25	3	22	10	40	35	10	2	22	23	22	17	38	28	25	5	37	21	36	31	4	46	13	5	44	19	10	32	26	15	17	15	25	17	16	18	30	21	13	16	1
			2	59-D-96-01	32	16	18	3	20	4	25	21	4	29	1	36	36	45	11	32	35	54	44	2	29	10	21	4	17	37	45	21	22	33	22	38	20	33	7	28	29	30	7	6	45	34	7	25	19
			1	43-D-92-02	1	8	9	17	25	3	22	10	40	35	10	2	22	23	22	17	38	28	25	5	37	21	36	31	4	46	13	5	44	19	10	32	26	15	17	15	25	17	16	5	38	40	6	21	26
			2	43-D-92-02	32	16	18	3	20	4	25	21	4	29	1	36	36	45	11	32	35	54	44	2	29	10	21	4	17	37	45	21	22	33	22	37	2	27	1	35	2	1	11	1	18	4	2	2	7
			1	D-93-01	1	8	9	17	25	3	22	10	40	35	10	2	23	26	4	5	33	5	43	20	34	17	30	21	5	49	14	12	24	37	5	28	5	24	31	41	32	7	23	5	38	40	6	21	26
			2	D-93-01	8	1	8	4	4	20	2	23	37	9	9	39	33	28	33	25	18	23	47	25	1	1	9	29	13	9	34	1	1	37	1	1	2	27	1	35	2	1	11	1	18	4	2	2	7
			1	8492	2	6	14	19	11	3	31	2	24	3	10	2	23	26	4	5	33	5	43	20	34	17	30	21	5	49	14	12	25	19	10	32	26	15	17	15	25	17	16	18	30	21	13	16	1
			2	8492	32	16	18	3	20	4	25	21	4	29	1	36	36	45	11	32	35	54	44	2	29	10	21	4	17	37	45	21	22	33	22	38	20	33	7	28	29	30	7	6	45	34	7	25	19
			1	22-D-99-02	2	6	14	19	11	3	31	2	24	3	10	2	23	26	4	5	33	5	43	20	34	17	30	21	5	49	14	12	24	37	5	28	5	24	31	41	32	7	23	5	38	40	6	21	26
			2	22-D-99-02	8	1	8	4	4	20	2	23	37	9	9	39	33	28	33	25	18	23	47	25	1	1	9	29	13	9	34	1	1	37	1	1	2	27	1	35	2	1	11	1	18	4	2	2	7
			1	11-M-98-03	2	6	14	19	11	3	31	2	24	3	10	2	23	26	4	5	33	5	43	20	34	17	30	21	5	49	14	12	24	37	5	28	5	24	31	41	32	7	23	5	38	40	6	21	26
			2	11-M-98-03	8	1	8	4	4	20	2	23	37	9	9	39	33	28	33	25	18	23	47	25	1	1	9	29	13	9	34	1	1	37	1	1	2	27	1	35	2	1	11	1	18	4	2	2	7
1994-2005			1	Varg0109	2	6	14	19	11	3	31	2	24	3	10	2	23	26	4	5	33	5	43	20	34	17	30	21	5	49	14	12	24	37	5	28	5	24	31	41	32	7	23	5	38	40	6	21	26
			2	Varg0109	24	12	1	8	5	10	11	9	26	4	3	11	17	2	8	18	2	30	25	5	37	21	32	21	5	49	14	12	24	37	5	28	5	24	31	41	32	7	23	5	38	40	6	21	26
			1	105-D-00-15	8	1	8	4	4	20	2	23	37	9	9	39	33	28	33	25	18	23	47	25	1	1	9	29	13	9	35	12	24	37	5	28	5	24	31	41	32	7	23	5	38	40	6	21	26
			2	105-D-00-15	24	12	1	8	5	10	11	9	26	4	3	11	17	2	8	18	2	30	25	5	37	21	36	31	4	46	13	5	44	19	10	32	26	15	17	15	25	17	16	18	29	40	6	21	26
			1	12-M-01-04	2	6	14	19	11	3	31	2	24	3	10	2	23	26	4	5	33	5	43	20	34	17	30	21	5	49	14	12	24	37	5	28	4	27	1	35	2	1	11	1	18	4	2	2	7
			2	12-M-01-04	2	6	14	19	11	3	31	2	24	3	10	2	23	26	4	5	33	2	25	5	37	21	36	31	4	46	13	5	44	19	10	32	26	15	17	15	25	17	16	18	30	21	13	16	1
			1	14-M-00-09	2	6	14	19	11	3	31	2	24	3	10	2	23	26	4	5	33	5	43	20	34	17	30	21	5	49	14	12	24	37	5	28	5	24	31	41	32	7	23	5	38	40	6	21	26
			2	14-M-00-09	1	8	9	17	25	3	22	10	40	35	10	2	22	23	22	17	38	28	25	5	37	21	36	31	4	46	13	5	44	19	10	32	26	15	17	15	25	17	16	18	30	21	13	16	1
			1	15-M-01-10	8	1	8	4	4	20	2	23	37	9	9	39	33	28	33	25	18	23	47	25	1	1	9	29	13	9	35	12	24	37	5	28	5	24	31	41	32	7	23	5	38	40	6	21	26
			2	15-M-01-10	24	12	1	8	5	10	11	9	26	4	3	11	17	2	8	18	2	36	47	25	1	1	9	29	13	9	34	1	1	37	1	1	2	27	17	15	25	17	16	18	30	21	13	16	1
			1	28-M-03-07	24	12	1	8	5	10	11	9	26	4	3	11	17	2	8	18	2	30	25	5	37	21	36	31	4	46	13	5	44	19	10	32	26	15	17	15	25	17	16	18	29	40	6	21	26
			2	28-M-03-07	8	1	8	4	4	20	2	23	37	9	9	39	33	28	33	25	18	23	47	25	1	1	9	29	13	9	34	1	1	37	1	1	2	27	1	35	2	1	11	1	18	4	2	2	7
			1	75-G9-05	8	1	8	4	4	20	2	23	37	9	9	39	33	28	33	25	18	23	47	25	1	1	9	29	13	9	34	1	1	37	1	1	2	27	1	35	2	1	11	1	18	4	2	2	7
			2	75-G9-05	24	12	1	8	5	10	11	9	26	4	10	2	23	26	4	5	33	4	25	5	37	21	36	31	4	46	13	5	44	19	10	32	26	15	17	15	25	17	16	18	30	21	13	16	1
			1	D-01-18	1	8	9	17	25	3	22	10	40	35	10	2	22	23	22	17	38	28	25	5	37	21	36	31	4	46	13	5	44	19	10	32	26	15	17	15	25	17	16	18	30	21	13	16	1
			2	D-01-18	8	1	8	4	4	20	2	23	37	9	9	39	33	28	33	25	18	23	47	25	1	1	9	29	13	9	34	1	1	37	1	1	2	27	1	35	2	1	11	1	18	4	2	2	7
			1	110-M-01-06	2	6	14	19	11	3	31	2	24	3	10	2	23	26	4	5	33	5	43	20	34	17	30	21	5	49	14	12	24	37	5	28	5	24	31	41	32	7	23	5	38	40	6	21	26
			2	110-M-01-06	8	1	8	4	4	20	2	23	37	9	9	39	33	28	33	25	18	23	47	25	1	1	9	29	13	9	34	1	1	37	1	2	4	27	1	35	2	1	11	1	18	4	2	2	7
			1	13-M-98-08	2	6	14	19	11	3	31	2	24	3	10	2	23	26	4	5	33	5	43	20	34	17	30	21	5	49	14	12	24	37	5	28	5	24	31	41	32	7	23	5	38	40	6	21	26
			2	13-M-98-08	2	6	14	19	11	3	31	2	24	3	10	2	23	26	4	5	33	5	43	20	34	17	30	21	5	49	14	12	24	37	5	28	5	24	31	42	2	1	11	1	18	4	2	2	7
			1	25-M-03-06	8	1	8	4	4	20	2	23	37	9	9	39	33	28	33	25	18	23	46	5	37	21	36	31	4	46	13	5	44	18	5	28	5	24	31	41	32	7	23	5	38	40	6	21	26
			2	25-M-03-06	8	1	8	4	4	20	2	23	37	9	9	39	33	28	33	25	18	23	47	25	1	1	9	29	13	9	34	1	1	37	1	1	2	27	1	35	2	1	11	1	18	4	2	2	7
			1	35-D-05-23	2	6	14	19	11	3	31	2	24	3	10	2	23	26	4	5	33	2	25	5	37	21	36	31	4	46	13	5	44	19	10	32	26	15	17	15	25	17	16	18	29	40	6	21	26
			2	35-D-05-23	24	12	1	8	5	10	11	9	26	4	3	11	17	2	8	18	2	30	25	5	37	21	36	31	4	46	13	5	44	19	10	32	26	15	17	15	25	17	16	18	30	21	13	16	1
			1	38-D-06-16	2	6	14	19	11	3	31	2	24	3	10	2	23	26	4	5	33	6	25	5	37	21	36	31	4	46	13	5	44	19	10	32	26	15	17	15	25	17	16	18	30	21	13	16	1
			2	38-D-06-16	8	1	8	4	4	20	2	23	37	9	9	39	33	28	33	25	18	23	47	25	1	1	9	29	13	9	34	3	44	19	10	32	26	15	17	15	25	17	16	18	30	21	13	16	1
			1	60-M-00-10	2	6	14	19	11	3	31	2	24	3	10	2	23	26	4	5	33	5	43	20	34	17	30	21	5	49	14	12	24	37	5	28	5	24	31	41	32	7	23	5	38	40	6	21	26
			2	60-M-00-10	1	8	9	17	25	3	22	10	40	35	10	2	22	23	22	17	38	28	25	5	37	21	36	31	4	46	13	5	44	19	10	32	26	15	17	15	25	17	16	18	30	21	13	16	1
			1	D-00-12	2	6	14	19	11	3	31	2	24	3	10	2	23	26	4	5	33	5	43	20	34	17	30	21	3	9	34	1	1	37	1	1	2	27	1	35	2	1	11	1	18	4	2	2	7
			2	D-00-12	2	6	14	19	11	3	31	2	24	3	10	2	23	26	4	5	33	5	43	20	34	17	30	21	5	49	14	12	24	37	5	28	5	24	31	41	32	7	23	5	38	40	6	21	26
			1	M-98-01	2	6	14	19	11	3	31	2	24	3	10	2	23	26	4	5	33	5	43	20	34	17	30	21	5	49	14	12	24	37	5	28	5	24	31	41	32	7	23	5	38	40	6	21	26
			2	M-98-01	2	6	14	19	11	3	31	2	24	3	10	2	23	26	4	5	33	5	43	20	34	17	30	21	3	9	34	1	1	37	1	1	2	27	1	35	2	1	11	1	18	4	2	2	7
			1	V009511	8	1	8	4	4	20	2	23	37	9	9	39	33	28	33	25	18	23	46	5	37	21	36	31	4	46	13	5	44	19	10	32	26	15	17	15	25	17	16	18	30	21	13	16	1
			2	V009511	2	6	14	19	11	3	31	2	24	3	10	2	23	26	4	5	33	5	43	20	38	1	9	29	13	9	34	1	1	37	1	1	2	27	1	35	2	1	11	1	18	4	2	2	7
			1	106-D-10-20	8	1	8	4	4	20	2	23	37	9	9	39	33	28	33	25	18	23	47	25	1	1	9	29	13	9	35	12	24	37	5	28	5	24	31	41	32	7	23	5	38	40	6	21	26
			2	106-D-10-20	8	1	8	4	4	20	2	23	37	9	9	39	33	28	33	25	18	23	47	25	1	1	9	29	13	9	34	1	1	37	1	1	2	27	1	35	2	1	11	1	18	4	2	2	7
			1	109-D-10-30	2	6	14	19	11	3	31	2	24	3	10	2	23	26	4	5	33	2	25	5	37	21	36	31	4	46	13	5	44	19	10	32	26	15	17	15	25	17	16	18	30	21	13	16	1
			2	109-D-10-30	2	6	14	19	11	3	31	2	24	3	10	2	23	26	4	5	33	5	43	20	34	17	30	21	5	49	14	12	24	37	1	1	2	27	1	35	2	1	11	1	18	4	2	2	7
			1	36-D-06-14	2	6	14	19	11	3	31	2	24	3	10	2	23	26	4	5	33	5	43	20	34	17	30	21	5	49	14	12	24	37	5	28	5	24	31	41	32	7	23	5	38	40	6	21	26
			2	36-D-06-14	2	6	14	19	11	3	31	2	24	3	10	2	23	26	4	5	33	5	43	20	34	17	30	21	5	49	14	12	24	37	5	28	5	24	31	41	32	7	23	5	38	40	6	21	26
			1	37-M-06-03	2	6	14	19	11	3	31	2	24	3	10	2	23	26	4	5	33	3	25	5	37	21	36	31	4	46	13	5	44	19	10	32	26	15	17	15	25	17	16	18	30	21	13	16	1
			2	37-M-06-03	24	12	1	8	5	10	11	9	26	4	3	11	17	2	8	18	2	30	25	5	37	21	36	31	4	46	13	5	44	19	10	33	5	24	31	41	32	7	23	5	38	40	6	21	26
			1	39-M-06-04	2	6	14	19	11	3	31	2	24	3	10	2	23	26	4	5	33	2	25	5	37	21	36	31	4	46	13	5	44	19	10	32	26	15	17	15	25	17	16	18	30	21	13	16	1
			2	39-M-06-04	24	12	1	8	5	10	11	9	26	4	3	11	17	2	4	5	33	5	43	20	34	17	30	21	3	9	34	1	1	37	1	1	2	27	1	35	2	1	11	1	18	4	2	2	7
			1	40-D-07-28	8	1	8	4	4	20	2	23	37	9	9	39	33	28	33	25	18	23	47	25	1	1	9	29	13	9	34	1	1	37	1	2	5	24	31	41	32	7	23	5	38	40	6	21	26
			2	40-D-07-28	2	6	14	19	11	3	31	2	24	3	10	2	23	26	4	5	33	6	25	5	37	21	36	31	4	46	13	5	44	19	10	32	26	15	17	15	25	17	16	18	30	21	13	16	1
			1	55-D-08-10	2	6	14	19	11	3	31	2	24	3	10	2	23	26	4	5	33	6	25	5	37	21	36	31	4	46	13	5	44	19	10	32	26	15	17	15	25	17	16	18	30	21	13	16	1
			2	55-D-08-10	24	12	1	8	5	10	11	9	26	4	3	11	17	2	8	18	2	30	25	5	37	21	36	31	4	46	13	5	44	19	10	32	26	15	17	15	25	17	16	18	30	21	13	16	1
			1	80-M-09-17	8	1	8	4	4	20	2	23	37	9	9	39	33	28	33	25	18	23	47	25	1	1	9	29	13	9	34	12	24	37	5	28	5	24	31	41	32	7	23	5	38	40	6	21	26
			2	80-M-09-17	2	6	14	19	11	3	31	2	24	3	10	2	23	26	4	5	33	5	43	20	34	17	30	21	5	49	14	12	24	37	10	32	26	15	17	15	25	17	16	18	30	20	2	2	7
			1	D-08-20	24	12	1	8	5	10	11	9	26	4	3	11	17	2	8	18	2	30	25	5	37	21	36	31	4	46	13	5	44	19	10	32	26	15	17	15	25	17	16	18	29	40	6	21	26
			2	D-08-20	8	1	8	4	4	20	2	23	37	9	9	39	33	28	33	25	18	23	47	25	1	1	9	29	13	9	34	1	1	37	5	28	5	24	31	41	32	7	23	5	38	40	6	21	26
			1	M-05-07	24	12	1	8	5	10	11	9	26	4	3	11	17	2	8	18	2	30	25	5	37	21	36	31	4	46	13	5	44	19	10	32	26	15	17	15	25	17	16	18	30	21	13	16	1
			2	M-05-07	2	6	14	19	11	3	31	2	24	3	10	2	23	26	4	5	33	5	43	20	34	17	30	21	3	9	34	1	1	37	1	1	2	27	1	35	2	1	11	1	18	4	2	2	7
			1	81-M-09-05	2	6	14	19	11	3	31	2	24	3	10	2	23	26	4	5	33	5	43	20	34	17	30	21	5	49	14	12	24	37	5	28	5	24	31	41	32	7	23	5	38	40	6	21	26
			2	81-M-09-05	2	6	14	19	11	3	31	2	24	3	10	2	23	26	4	5	33	2	25	5	37	21	36	31	4	46	13	5	44	19	10	32	26	15	17	15	25	17	16	18	30	21	13	16	1
2006-2014			1	103-D-11-17	24	12	1	8	5	10	11	9	26	4	3	11	17	2	8	18	2	30	25	5	37	21	36	31	4	46	13	5	44	19	10	32	26	15	17	15	25	17	16	18	29	40	6	21	26
			2	103-D-11-17	24	12	1	14	4	20	2	23	37	9	9	39	33	28	33	25	18	23	47	25	1	1	9	29	13	9	34	1	1	37	5	28	5	24	31	41	32	7	23	5	38	40	6	21	26
			1	112-D-10-29	8	1	8	4	4	20	2	23	37	9	9	39	33	28	33	25	18	23	47	25	1	1	9	29	13	5	13	5	44	19	10	32	26	15	17	15	25	17	16	18	30	21	13	16	1
			2	112-D-10-29	8	1	8	4	4	20	2	23	37	9	9	39	33	28	33	25	18	23	47	25	1	1	9	29	13	9	34	1	1	37	1	1	2	27	1	35	2	1	11	1	18	4	2	2	7
			1	45-D-07-24	8	1	8	4	4	20	2	23	37	9	9	39	33	28	33	25	18	23	47	25	1	1	9	29	13	9	34	1	1	37	1	1	2	27	1	35	2	1	11	1	18	4	2	2	7
			2	45-D-07-24	2	6	14	19	11	3	31	2	24	3	10	2	23	26	4	5	33	5	43	20	34	17	30	21	5	49	14	12	24	37	5	28	5	24	31	41	32	7	23	5	38	40	8	16	1
			1	48-D-08-21	2	6	14	19	11	3	31	2	24	3	10	2	23	26	4	5	33	5	43	20	34	17	30	21	5	49	14	12	24	37	5	28	5	24	31	41	32	7	23	5	38	40	8	16	1
			2	48-D-08-21	8	1	8	4	4	20	2	23	37	9	9	39	33	28	33	25	18	23	47	25	1	1	9	29	13	9	35	12	24	37	5	28	5	24	31	39	25	17	16	18	30	21	13	2	7
			1	51-D-07-09	8	1	8	4	4	20	2	23	37	9	9	39	33	28	33	25	18	23	47	25	1	1	9	29	13	9	34	1	1	37	1	1	2	27	1	35	2	1	11	1	18	4	2	2	7
			2	51-D-07-09	8	1	8	4	4	20	2	23	37	9	9	39	33	28	33	25	18	23	48	20	34	17	30	21	5	49	14	1	1	37	1	1	2	27	1	35	2	1	11	1	18	4	2	2	7
			1	52-D-07-17	8	1	8	4	4	20	2	23	37	9	9	39	33	28	33	25	18	23	47	25	1	1	9	29	13	9	34	1	1	37	1	1	2	27	1	35	2	1	12	5	38	40	6	21	26
			2	52-D-07-17	8	1	8	4	4	20	2	23	37	9	9	39	33	28	33	25	18	23	47	25	1	1	9	29	13	9	34	1	1	37	5	28	5	24	31	41	32	7	23	5	38	40	6	21	26
			1	53-D-08-08	8	1	8	4	4	20	2	23	37	9	9	39	33	28	33	25	18	23	47	25	1	1	9	29	13	9	34	1	1	37	5	28	5	24	31	41	32	7	23	5	38	40	6	21	26
			2	53-D-08-08	8	1	8	4	4	20	2	23	37	9	9	39	33	28	33	25	18	23	47	25	1	1	9	29	13	9	34	1	1	37	5	28	5	24	31	41	32	7	23	5	38	40	6	21	26
			1	54-M-07-06	8	1	8	4	4	20	2	23	37	9	9	39	33	28	33	25	18	23	47	25	1	1	9	29	13	9	34	1	1	37	5	28	5	24	31	41	32	7	23	5	38	40	6	21	26
			2	54-M-07-06	2	6	14	19	11	3	31	2	24	3	10	2	23	26	4	5	33	5	43	20	34	17	30	21	5	49	14	12	24	37	10	32	26	15	17	15	25	17	16	18	30	21	13	16	1
			1	56-D-07-16	8	1	8	4	4	20	2	23	37	9	9	39	33	28	33	25	18	23	47	25	1	1	9	29	13	9	34	3	44	19	10	32	26	15	17	15	25	17	16	18	30	21	13	16	1
			2	56-D-07-16	24	12	1	8	5	10	11	9	26	4	3	11	17	2	8	18	2	30	25	5	37	21	36	31	4	46	13	5	44	19	10	32	26	15	17	15	25	17	16	18	30	21	13	16	1
			1	D-08-19	2	6	14	19	11	3	31	2	24	3	10	2	23	26	4	5	33	5	43	20	34	17	30	21	5	49	14	12	24	37	5	28	5	24	31	41	32	7	23	5	38	40	6	21	26
			2	D-08-19	2	6	14	19	11	3	31	2	24	3	10	2	23	26	4	5	33	2	25	5	37	21	36	31	4	46	13	5	44	19	10	32	26	15	17	15	25	17	16	18	30	21	13	16	1
			1	102-G34-10	8	1	8	4	4	20	2	23	37	9	9	39	33	28	33	25	18	23	47	25	1	1	9	31	4	46	13	5	44	19	10	32	26	15	17	15	25	17	16	18	29	40	4	16	1
			2	102-G34-10	8	1	8	4	4	20	2	23	37	9	9	39	33	28	33	25	18	23	46	5	37	21	36	31	4	46	13	5	44	19	10	32	26	15	17	15	25	17	16	18	30	21	13	21	26
			1	111-G110-11	8	1	8	4	4	20	2	23	37	9	9	39	33	28	33	25	18	23	47	25	1	1	9	29	13	9	34	1	1	37	1	1	2	27	1	35	2	1	11	1	18	4	2	2	7
			2	111-G110-11	8	1	8	4	4	20	2	23	37	9	9	39	33	28	33	25	18	23	47	25	1	1	9	29	13	9	34	1	1	37	1	1	2	27	1	35	2	1	11	1	18	4	2	2	7
			1	61-G97-13	2	6	14	19	11	3	31	2	24	3	10	2	23	26	4	5	33	5	43	20	34	17	30	21	5	49	14	12	24	37	10	32	26	15	17	15	25	17	16	18	30	20	2	2	7
			2	61-G97-13	8	1	8	4	4	20	2	23	37	9	9	39	33	28	33	25	18	23	47	25	1	1	9	29	13	9	35	12	24	37	5	28	5	24	31	41	32	7	23	5	38	40	6	21	26
			1	62-G174-13	24	12	1	8	5	10	11	9	26	4	3	11	17	2	8	18	1	23	47	25	1	1	9	29	13	50	14	12	24	37	5	28	5	24	31	41	32	7	23	5	38	40	6	21	26
			2	62-G174-13	2	6	14	19	11	3	31	2	24	3	10	2	23	26	4	5	33	5	43	20	34	17	30	21	5	49	14	12	24	37	10	32	26	15	17	15	25	17	16	18	30	21	12	2	7
			1	68-D-10-68	8	1	8	4	4	20	2	23	37	9	9	39	33	28	33	25	18	23	47	25	1	1	9	29	13	9	34	1	1	37	5	28	5	24	31	41	32	7	23	5	38	40	6	21	26
			2	68-D-10-68	24	12	1	8	5	10	11	9	26	4	3	11	17	2	8	18	2	30	25	5	37	21	36	31	4	46	13	5	44	19	10	32	26	15	17	15	25	17	16	18	30	21	13	16	1
			1	69-D-10-15	24	12	1	8	5	10	11	9	26	4	3	11	17	2	8	18	2	30	25	5	37	21	36	31	4	46	13	5	44	19	10	32	26	15	17	15	25	17	16	18	29	40	6	21	26
			2	69-D-10-15	2	6	14	19	11	3	31	2	24	3	10	2	23	26	4	5	33	5	43	20	34	17	30	21	5	49	14	12	24	37	5	28	5	24	31	41	32	7	23	5	38	40	6	21	26
			1	108-D-10-44	24	12	1	8	5	10	11	9	26	4	3	11	17	2	8	18	2	30	25	5	37	21	36	31	4	46	13	5	44	19	10	32	26	15	17	15	25	17	16	18	29	40	6	21	26
			2	108-D-10-44	24	12	1	8	5	10	11	9	26	4	3	11	17	2	8	18	2	30	25	5	37	21	36	31	4	46	13	6	24	37	5	28	5	24	31	41	32	7	23	5	38	40	6	21	26
			1	70-D-10-23	2	6	14	19	11	3	31	2	24	3	10	2	23	26	4	5	32	30	25	5	37	21	36	31	4	46	13	5	44	19	10	32	26	15	17	15	25	17	16	18	29	40	6	21	26
			2	70-D-10-23	2	6	14	19	11	3	31	2	24	3	10	2	23	26	4	5	33	5	43	20	34	17	30	21	5	49	14	12	24	37	4	32	26	15	17	15	25	17	15	1	18	4	2	2	7
			1	92-G58-15	24	12	1	8	5	10	11	9	26	4	3	11	17	2	8	18	1	23	47	25	1	17	30	21	5	49	14	12	24	37	5	28	5	24	31	41	32	7	23	5	38	40	6	21	26
			2	92-G58-15	8	1	8	4	4	20	2	23	37	9	9	39	33	28	33	25	18	23	47	25	1	1	9	29	13	9	34	1	1	37	1	1	2	27	1	35	2	1	11	1	18	4	2	2	7
			1	73-D-11-22	2	6	14	19	11	3	31	2	24	3	10	2	23	26	4	5	33	5	43	20	34	17	30	21	5	49	14	12	24	37	5	28	5	24	31	41	32	7	23	5	38	40	6	21	26
			2	73-D-11-22	8	1	8	4	4	20	2	23	37	9	9	39	33	28	33	25	18	23	47	25	1	1	9	29	13	9	34	12	24	37	5	28	5	24	31	41	32	7	22	18	30	21	13	16	1
			1	77-G87-12	2	6	14	19	11	3	31	2	24	3	4	11	17	2	8	18	2	30	25	5	34	17	30	21	5	49	14	12	24	37	5	28	5	24	31	41	32	7	23	5	38	40	6	21	26
			2	77-G87-12	2	6	14	19	11	10	11	9	27	9	36	2	23	26	4	5	33	5	43	20	34	17	30	21	5	49	14	12	24	37	5	28	5	24	31	39	25	17	16	18	30	21	13	16	1
			1	78-D-11-58	24	12	1	8	5	10	11	9	26	4	3	11	17	2	8	18	2	30	25	5	37	21	36	31	4	46	13	5	44	19	10	32	26	15	17	15	25	17	16	18	29	40	6	21	26
			2	78-D-11-58	8	1	8	4	4	20	2	23	37	9	9	39	33	28	33	25	18	23	47	25	1	1	9	29	13	9	34	1	1	37	1	1	2	27	1	35	2	1	11	1	18	4	2	2	7
			1	86-G126-13	24	12	1	8	5	10	11	9	26	4	3	11	17	2	8	18	2	30	25	6	34	17	30	21	5	49	14	12	24	37	5	28	5	24	31	41	32	7	23	5	38	40	6	21	26
			2	86-G126-13	2	6	14	19	11	10	11	9	26	4	3	11	17	2	8	18	2	30	25	5	34	17	30	21	5	49	14	12	24	37	5	28	5	24	31	41	32	7	23	1	38	40	6	21	25
			1	88-G50-12	8	1	8	4	4	20	2	23	37	9	9	39	33	28	33	25	18	23	47	25	1	1	9	29	13	9	34	1	1	37	1	1	2	27	1	35	2	1	11	1	18	4	2	2	7
			2	88-G50-12	2	6	14	19	11	3	31	2	24	3	10	2	23	26	4	5	33	5	43	20	34	17	30	21	5	49	14	12	24	37	5	28	5	24	32	35	2	1	11	1	18	4	2	2	7
			1	91-G24-14	8	1	8	4	4	20	2	23	37	9	9	39	33	28	33	25	18	23	47	25	1	1	9	29	13	9	34	1	1	37	1	1	2	27	1	35	2	1	11	1	18	4	2	2	7
			2	91-G24-14	2	6	14	19	11	3	31	2	24	3	10	2	23	26	4	5	33	5	43	20	34	17	30	21	5	49	14	12	24	37	5	28	5	24	31	41	32	7	23	5	38	40	2	2	7
			1	95-G175-13	2	6	14	19	11	3	31	2	24	3	10	2	23	26	4	5	33	5	43	20	33	1	9	29	13	9	34	1	1	37	1	1	2	27	1	35	2	1	11	1	18	4	2	2	7
			2	95-G175-13	2	6	14	19	11	3	31	2	24	3	9	39	33	28	33	25	18	23	47	25	1	1	9	29	13	9	34	1	1	37	1	1	2	27	1	35	2	1	11	1	18	4	2	2	7
			1	97-G32-12	2	6	14	19	11	3	31	2	24	3	10	2	23	26	4	5	33	5	43	20	34	17	30	21	5	49	14	12	24	38	10	32	26	15	17	15	25	17	16	18	30	21	13	16	1
			2	97-G32-12	8	1	8	4	4	20	2	23	37	9	9	39	33	28	33	25	18	23	47	25	1	1	9	29	13	9	35	12	24	37	5	28	5	24	31	41	32	7	23	5	38	40	6	21	26
			1	D-10-50	2	6	14	19	11	3	31	2	24	3	10	2	23	26	4	5	33	5	43	20	34	17	30	21	5	49	14	12	24	37	5	28	5	24	31	41	32	7	23	2	30	21	13	16	1
			2	D-10-50	8	1	8	4	4	20	2	23	37	9	9	39	33	28	33	25	18	23	47	25	1	1	9	29	13	9	34	1	1	37	1	1	2	27	1	35	2	1	11	1	18	4	2	2	7
Founder haplotype assignment:
Female founder			1	F_1	4	2	14	19	11	3	31	2	24	3	11	32	26	33	27	37	6	35	39	16	20	24	5	13	23	34	23	14	7	33	23	17	10	8	34	18	4	23	1	21	15	6	35	9	11
			2	F_2	1	8	9	17	25	3	22	10	40	35	10	2	22	23	22	17	38	28	25	5	37	21	36	31	4	46	13	5	44	19	10	32	26	15	17	15	25	17	16	18	30	21	13	16	1
First male founder			1	M1_1	2	6	14	19	11	3	31	2	24	3	10	2	23	26	4	5	33	5	43	20	34	17	30	21	5	49	14	12	24	37	5	28	5	24	31	41	32	7	23	5	38	40	6	21	26
			2	M1_2	24	12	1	8	5	10	11	9	26	4	3	11	17	2	8	18	2	32	39	16	20	24	5	13	23	34	23	1	4	23	44	28	5	24	29	32	12	13	5	7	34	23	5	5	9
Second male founder			1	M2_1	8	1	8	4	4	20	2	23	37	9	9	39	33	28	33	25	18	23	47	25	1	1	9	29	13	9	34	1	1	37	1	1	2	27	1	35	2	1	11	1	18	4	2	2	7
			2	M2_2	32	16	18	3	20	4	25	21	4	29	1	36	36	45	11	32	35	54	44	2	29	10	21	4	17	37	45	21	22	33	22	38	20	33	7	28	29	30	7	6	45	34	7	25	19
[truncated: 78 more columns]

## Sheet: chr2_1Mb
				window:	0	1	2	3	4	5	6	7	8	9	10	11	12	13	14	15	16	17	18	19	20	21	22	23	24	25	26	27	28	29	30	31	32	33	34	35	36	37	38	39	40	41	42	43	44
Female founder			1	D-85-01	1	1	1	2	0	0	0	1	1	1	11	8	2	2	23	2	4	9	63	19	22	1	18	42	9	43	4	11	31	12	10	37	16	25	30	7	13	2	1	30	20	13	6	8	10
			2	D-85-01	12	13	18	2	0	0	0	2	4	32	37	30	8	10	4	29	4	14	8	18	4	26	10	21	27	41	39	23	24	29	30	17	7	22	17	12	34	10	41	19	26	21	18	26	27
1983-1993	First male founder	F1 offspring	1	D-84-03	12	13	18	2	0	0	0	2	4	32	37	31	2	2	23	2	4	9	63	19	22	1	18	42	9	43	4	11	31	12	10	37	16	25	30	7	13	2	1	30	20	13	6	8	10
			2	D-84-03	12	13	18	14	0	0	0	19	22	6	32	1	21	29	9	15	24	20	7	25	10	29	26	10	23	30	23	21	1	25	21	3	19	2	6	15	17	18	22	19	26	21	18	26	30
			1	D-85-02	12	13	18	14	0	0	0	19	22	6	32	1	21	29	9	15	24	20	7	25	10	29	26	10	23	30	23	21	1	25	21	3	19	2	6	15	17	18	22	19	26	21	18	26	30
			2	D-85-02	12	13	18	2	0	0	0	2	4	32	37	30	8	10	4	29	4	14	8	18	4	26	10	21	27	41	39	23	24	29	30	17	7	22	17	12	34	10	41	19	26	21	18	26	27
			1	3-D-86-01	12	13	18	14	0	0	0	19	22	6	32	1	21	29	9	15	24	20	7	25	10	29	26	10	24	32	20	18	18	22	25	24	26	11	15	2	31	31	6	32	16	15	9	17	14
			2	3-D-86-01	12	13	18	2	0	0	0	2	4	32	37	30	8	10	4	29	4	14	8	18	4	26	10	21	27	41	39	23	24	29	30	17	7	22	17	12	34	10	41	19	26	21	18	26	27
		F2 offspring	1	4-D-89-01	13	16	12	29	0	0	0	28	1	1	11	8	2	2	23	2	4	9	63	19	22	1	18	42	9	43	4	11	31	12	10	37	16	25	30	7	13	2	1	30	20	13	6	8	10
			2	4-D-89-01	12	13	18	14	0	0	0	19	22	6	32	1	21	29	9	15	24	20	7	25	10	29	26	10	23	30	23	20	18	22	25	24	26	11	15	2	31	31	6	32	16	15	9	17	14
			1	5-D-91-01	12	13	18	14	0	0	0	19	22	6	32	1	21	29	9	15	24	20	7	25	10	29	26	10	23	30	23	20	18	22	25	24	26	11	15	2	31	31	6	32	16	15	9	17	14
			2	5-D-91-01	13	16	12	29	0	0	0	29	9	21	6	11	4	32	6	22	30	17	50	11	4	22	23	15	8	32	20	18	18	22	25	24	26	11	15	2	31	31	6	32	16	15	9	17	14
			1	16-D-89-03	12	13	18	14	0	0	0	19	22	6	32	1	21	29	9	15	24	20	7	25	10	29	26	8	9	43	4	11	31	12	10	37	16	25	30	7	13	2	1	30	20	13	6	8	10
			2	16-D-89-03	13	16	12	29	0	0	0	29	9	21	6	11	4	32	6	22	30	17	50	11	4	22	23	15	8	32	20	18	18	22	25	24	26	11	15	2	31	31	6	32	16	15	9	17	14
			1	17-D-92-05	1	1	1	2	0	0	0	1	1	1	11	8	2	2	23	2	4	9	63	19	22	1	18	42	9	43	4	11	31	12	10	37	16	25	30	7	13	2	1	30	20	13	6	8	10
			2	17-D-92-05	12	13	18	14	0	0	0	19	22	6	32	1	21	29	9	15	24	20	7	25	10	29	26	9	8	32	20	18	18	22	25	24	26	11	15	2	31	31	6	32	16	15	9	17	14
			1	30-D-93-02	1	1	1	2	0	0	0	1	1	1	11	8	2	2	23	2	4	9	63	19	22	1	18	42	9	43	4	11	31	12	10	37	16	25	30	7	13	2	1	30	20	13	6	8	10
			2	30-D-93-02	1	1	1	2	0	0	0	1	1	1	11	8	2	2	23	2	4	9	63	19	22	1	18	42	9	43	4	11	31	12	10	37	16	25	30	7	13	2	1	30	20	13	6	8	10
		F3 offspring	1	6-M-98-02	1	1	1	2	0	0	0	1	1	1	11	8	2	2	23	2	4	9	63	19	22	1	18	42	9	43	4	11	31	12	10	37	16	25	30	7	13	2	1	30	20	13	6	8	10
			2	6-M-98-02	12	13	18	14	0	0	0	19	22	6	32	1	21	29	9	15	24	20	7	25	10	29	26	9	8	32	20	18	18	22	25	24	26	11	15	2	31	31	6	32	16	15	9	17	14
			1	31-D-93-03	1	1	1	2	0	0	0	1	1	1	11	8	2	2	23	2	4	9	63	19	22	1	18	42	9	43	4	11	31	12	10	37	16	25	30	7	13	2	1	30	20	13	6	8	10
			2	31-D-93-03	1	1	1	2	0	0	0	1	1	1	11	8	2	2	23	2	4	9	63	19	22	1	18	42	9	43	4	11	31	12	10	37	16	25	30	7	13	2	1	30	20	13	6	8	10
			1	19-D-94-01	1	1	1	2	0	0	0	1	1	1	11	8	2	2	23	2	4	9	63	19	22	1	18	42	9	43	4	11	31	12	10	37	16	25	30	7	13	2	1	30	20	13	6	8	10
			2	19-D-94-01	13	16	12	29	0	0	0	29	9	21	6	11	4	32	6	22	30	17	50	11	4	22	23	15	8	32	20	18	18	22	25	24	26	11	15	2	31	31	6	32	16	15	9	17	15
			1	57-D-92-06	1	1	1	2	0	0	0	1	1	1	11	8	2	2	23	2	4	9	63	19	22	1	18	42	9	43	4	11	31	12	10	37	16	25	30	7	13	2	1	30	20	13	6	8	10
			2	57-D-92-06	13	16	12	29	0	0	0	29	9	21	6	11	4	32	6	22	30	17	50	11	4	22	22	42	9	43	4	11	31	12	10	37	16	25	30	7	13	2	1	30	20	13	6	8	10
	Second male founder	F1 offspring	1	94-D-92-01	1	1	1	2	0	0	0	2	4	32	37	30	8	10	4	29	4	14	57	2	16	13	19	13	4	6	28	2	28	30	18	2	29	7	27	4	6	1	20	1	4	17	28	1	14
			2	94-D-92-01	12	13	18	2	0	0	0	2	4	32	37	30	8	10	4	29	5	20	7	25	10	29	26	10	23	30	23	21	1	25	21	1	26	11	15	2	31	31	6	32	16	15	9	17	14
			1	59-D-96-01	1	1	1	2	0	0	0	2	4	32	37	30	8	10	4	29	4	14	56	5	3	16	29	11	20	46	32	39	30	32	5	28	40	14	18	29	26	19	11	25	4	16	22	4	26
			2	59-D-96-01	12	13	18	2	0	0	0	2	4	32	37	30	8	10	4	29	4	14	8	18	4	26	10	21	27	41	39	23	24	29	30	17	7	22	17	12	33	2	1	30	20	13	6	8	10
			1	43-D-92-02	1	1	1	2	0	0	0	2	4	32	37	30	8	10	4	29	4	14	57	2	16	13	19	13	4	6	28	2	28	30	18	2	29	7	27	4	6	1	20	1	4	17	28	1	14
			2	43-D-92-02	12	13	18	2	0	0	0	2	4	32	37	30	8	10	4	29	4	14	8	18	4	26	10	21	27	41	39	23	24	29	30	17	7	22	17	12	33	2	1	30	20	13	6	8	10
			1	D-93-01	1	1	1	2	0	0	0	2	4	32	37	30	8	10	4	29	4	14	57	2	16	13	19	13	4	6	28	2	28	30	18	2	29	7	27	4	6	1	20	1	4	17	28	1	14
			2	D-93-01	12	13	18	14	0	0	0	19	22	6	32	1	21	29	9	15	24	20	7	25	10	29	26	10	23	30	23	21	1	25	21	1	26	11	15	2	31	31	6	32	16	15	9	17	14
			1	8492	1	1	1	2	0	0	0	2	4	32	37	30	8	10	4	29	4	14	57	2	16	13	19	13	4	6	28	2	28	30	18	2	29	7	27	4	6	1	20	1	4	17	28	1	14
			2	8492	12	13	18	14	0	0	0	19	22	6	32	1	21	29	9	15	24	20	7	25	10	29	26	10	23	30	23	21	1	25	21	1	26	11	15	2	31	31	6	32	16	15	9	17	14
			1	22-D-99-02	1	1	1	2	0	0	0	2	4	32	37	30	8	10	4	29	4	14	56	5	3	16	29	11	20	46	32	39	30	32	5	28	40	14	18	29	26	19	11	25	4	16	22	4	26
			2	22-D-99-02	12	13	18	14	0	0	0	19	22	6	32	1	21	29	9	15	24	20	7	25	10	29	26	10	23	30	23	21	1	25	21	1	26	11	15	2	31	31	6	32	16	15	9	17	14
			1	11-M-98-03	1	1	1	2	0	0	0	2	4	32	37	30	8	10	4	29	4	14	57	2	16	13	19	13	4	6	28	2	28	30	18	2	29	7	27	4	6	1	20	1	4	17	28	1	14
			2	11-M-98-03	12	13	18	14	0	0	0	19	22	6	32	1	21	29	9	15	24	20	7	25	10	29	26	10	23	30	23	21	1	25	21	1	26	11	15	2	31	31	6	32	16	15	9	17	14
1994-2005			1	Varg0109	1	1	1	2	0	0	0	1	1	1	11	8	2	2	23	2	4	9	63	19	22	1	18	42	9	43	4	11	31	12	10	37	16	25	30	7	13	2	1	30	20	13	6	8	10
			2	Varg0109	1	1	1	2	0	0	0	2	4	32	37	30	8	10	4	29	4	14	7	25	10	29	26	10	23	30	23	21	1	25	21	1	26	11	15	2	31	31	6	32	16	15	9	17	14
			1	105-D-00-15	1	1	1	2	0	0	0	1	1	1	11	8	2	2	23	2	4	9	63	19	22	1	18	42	9	43	4	11	31	12	10	37	16	25	30	7	13	2	1	30	20	13	6	8	10
			2	105-D-00-15	1	1	1	2	0	0	0	2	4	32	37	30	8	10	4	29	4	14	56	5	3	16	29	3	4	6	28	2	28	30	18	2	29	7	27	4	6	1	20	1	4	17	28	1	14
			1	12-M-01-04	12	13	18	14	0	0	0	19	22	6	32	1	21	29	9	15	24	20	7	25	10	29	26	9	8	32	20	18	18	22	25	24	26	11	15	2	31	31	6	32	16	15	9	17	14
			2	12-M-01-04	1	1	1	2	0	0	0	2	4	32	37	30	8	10	4	29	4	14	57	2	16	13	19	13	23	30	23	21	1	25	21	1	26	11	15	2	31	31	6	32	16	15	9	17	14
			1	14-M-00-09	1	1	1	2	0	0	0	2	4	32	37	30	8	10	4	29	4	12	7	25	10	29	26	10	23	30	23	21	1	25	21	1	26	11	15	2	31	31	6	32	16	15	9	17	14
			2	14-M-00-09	13	16	12	29	0	0	0	29	9	21	6	11	4	32	6	22	30	17	50	11	4	22	23	15	8	32	20	18	18	22	25	24	26	11	15	2	31	31	6	32	16	15	9	17	14
			1	15-M-01-10	1	1	1	2	0	0	0	1	1	1	11	8	2	2	23	2	4	9	63	19	22	1	18	42	9	43	4	11	31	12	10	37	16	25	30	7	13	2	1	30	20	13	6	8	10
			2	15-M-01-10	1	1	1	2	0	0	0	1	1	1	11	8	2	2	23	2	4	9	63	19	22	1	18	42	9	43	4	11	31	12	10	37	16	25	30	7	13	2	1	30	20	13	6	8	10
			1	28-M-03-07	1	1	1	2	0	0	0	2	4	32	37	30	8	10	4	29	4	14	9	5	3	16	29	3	4	6	28	2	28	30	18	2	29	7	27	4	6	1	20	1	4	17	28	1	14
			2	28-M-03-07	1	1	1	2	0	0	0	2	4	32	37	30	8	10	4	29	4	14	57	2	16	13	19	13	4	6	28	2	28	30	18	2	29	7	27	4	6	1	20	1	4	17	28	1	14
			1	75-G9-05	1	1	1	2	0	0	0	1	1	1	11	8	2	2	23	2	4	9	63	19	22	1	18	42	9	43	4	11	31	12	10	37	16	25	30	7	13	2	1	30	20	13	6	8	10
			2	75-G9-05	12	13	18	14	0	0	0	19	22	6	32	1	21	29	9	15	24	20	7	25	10	29	26	10	23	30	23	21	1	25	21	1	26	11	15	2	31	31	6	32	16	15	9	17	14
			1	D-01-18	1	1	1	2	0	0	0	1	1	1	11	8	2	2	23	2	4	9	63	19	22	1	18	42	9	43	4	11	31	12	10	37	16	25	30	7	13	2	1	30	20	13	6	8	10
			2	D-01-18	1	1	1	2	0	0	0	2	4	32	37	30	8	10	4	29	4	14	56	5	3	16	29	3	4	6	28	2	28	30	18	2	29	7	27	4	6	1	20	1	4	17	28	1	14
			1	110-M-01-06	12	13	18	14	0	0	0	19	22	6	32	1	21	29	9	15	24	20	7	25	10	29	26	10	23	30	23	21	1	25	21	1	26	11	15	2	31	31	6	32	16	15	9	17	14
			2	110-M-01-06	1	1	1	2	0	0	0	2	4	32	37	30	8	10	4	29	4	14	57	2	16	13	19	13	23	30	23	21	1	25	21	1	26	11	15	2	31	31	6	32	16	15	9	17	14
			1	13-M-98-08	12	13	18	14	0	0	0	19	22	6	32	1	21	29	9	15	24	20	12	2	16	13	19	13	4	6	28	2	28	30	18	2	29	7	27	4	6	1	20	1	4	17	28	1	14
			2	13-M-98-08	12	13	18	14	0	0	0	19	22	6	32	1	21	29	9	15	24	20	7	25	10	29	26	9	8	32	20	18	18	22	25	24	26	11	15	2	31	31	6	32	16	15	9	17	14
			1	25-M-03-06	12	13	18	2	0	0	0	1	1	1	11	8	2	2	23	2	4	9	63	19	22	1	18	42	9	43	4	11	31	12	10	37	16	25	30	7	13	2	2	1	4	17	28	1	14
			2	25-M-03-06	1	1	1	2	0	0	0	2	4	32	37	30	8	10	4	29	4	14	57	2	16	13	19	13	4	6	28	2	28	30	18	2	29	7	27	4	6	1	20	1	4	16	22	4	26
			1	35-D-05-23	1	1	1	2	0	0	0	1	1	1	11	8	2	2	23	2	4	9	63	19	22	1	18	42	9	43	4	11	31	12	10	37	16	25	30	7	13	2	1	30	20	13	6	8	10
			2	35-D-05-23	1	1	1	2	0	0	0	2	4	32	37	30	8	10	4	29	4	14	57	2	16	14	26	10	23	30	23	21	1	25	21	1	26	11	15	2	31	31	6	32	16	15	9	17	14
			1	38-D-06-16	12	13	18	14	0	0	0	19	22	6	32	1	21	29	9	15	24	20	7	25	10	29	26	9	8	32	20	18	18	22	25	24	26	11	15	2	31	31	6	32	16	15	9	17	14
			2	38-D-06-16	1	1	1	2	0	0	0	2	4	32	37	30	8	10	4	29	4	14	57	2	16	13	19	13	23	30	23	21	1	25	21	1	26	11	15	2	31	31	6	32	16	15	9	17	14
			1	60-M-00-10	13	16	12	29	0	0	0	29	9	21	6	11	4	32	6	22	30	17	50	11	4	22	23	15	8	32	20	18	18	22	25	24	26	11	15	2	31	31	6	32	16	15	9	17	14
			2	60-M-00-10	1	1	1	2	0	0	0	2	4	32	37	30	8	10	4	29	4	12	7	25	10	29	26	10	23	30	23	21	1	25	21	1	26	11	15	2	31	31	6	32	16	15	9	17	14
			1	D-00-12	12	13	18	14	0	0	0	19	22	6	32	1	21	29	9	15	24	20	7	25	10	29	26	8	9	43	4	11	31	12	10	37	16	25	30	7	13	2	1	30	20	13	6	8	10
			2	D-00-12	1	1	1	2	0	0	0	2	4	32	37	30	8	10	4	29	4	14	57	2	16	13	19	13	4	6	28	2	28	30	18	2	29	7	27	4	6	1	20	1	4	17	28	1	14
			1	M-98-01	12	13	18	16	0	0	0	19	22	6	32	1	21	29	9	15	24	20	7	25	10	29	26	8	9	43	3	21	1	25	21	1	26	11	15	2	31	31	6	32	16	15	9	17	14
			2	M-98-01	13	16	12	29	0	0	0	29	9	21	6	11	4	31	9	16	4	14	57	2	16	13	19	13	4	6	28	2	28	30	18	2	29	7	27	4	6	1	20	1	4	17	28	1	14
			1	V009511	1	1	1	2	0	0	0	2	4	32	37	30	8	10	4	29	4	14	57	2	16	13	19	13	4	6	28	2	28	30	18	2	29	7	27	4	6	1	20	1	4	17	28	3	10
			2	V009511	12	13	18	2	0	0	0	2	4	32	37	30	8	10	4	29	4	14	8	18	4	26	10	21	27	41	39	23	24	29	30	17	7	22	17	12	33	2	1	30	20	13	6	8	10
			1	106-D-10-20	1	1	1	2	0	0	0	1	1	1	11	8	2	2	23	2	4	9	63	19	22	1	18	42	9	42	28	2	28	30	18	2	29	7	27	4	6	1	20	1	4	17	28	3	10
			2	106-D-10-20	12	13	18	2	0	0	0	2	4	32	37	30	8	10	4	29	4	14	8	18	4	26	10	21	27	41	39	23	28	30	18	2	29	7	27	4	6	1	20	1	4	16	22	4	26
			1	109-D-10-30	1	1	1	2	0	0	0	2	4	32	37	30	8	10	4	29	4	14	57	2	16	13	19	13	4	6	28	2	28	30	18	2	29	7	27	4	7	31	6	32	16	15	9	17	14
			2	109-D-10-30	13	16	12	29	0	0	0	29	9	21	6	11	4	32	6	22	30	17	50	11	4	22	23	15	8	32	20	18	18	22	25	24	26	11	15	2	31	31	6	32	16	15	9	17	14
			1	36-D-06-14	1	1	1	2	0	0	0	2	4	32	37	30	8	10	4	29	4	9	63	19	22	1	18	42	9	43	4	11	31	12	10	37	16	25	30	7	13	2	1	30	20	13	6	8	10
			2	36-D-06-14	1	1	1	2	0	0	0	2	4	32	37	30	8	10	4	29	4	14	57	2	16	14	26	10	23	30	23	21	1	25	21	1	26	11	15	2	31	31	6	32	16	15	9	17	14
			1	37-M-06-03	12	13	18	14	0	0	0	19	22	6	32	1	21	29	9	15	24	20	7	25	10	29	26	9	8	32	20	18	18	22	25	24	26	11	15	2	31	31	6	33	4	17	28	1	14
			2	37-M-06-03	12	13	18	14	0	0	0	18	4	32	37	30	8	10	4	29	4	14	57	2	16	13	19	13	4	6	23	21	1	25	21	1	26	11	15	2	31	31	6	32	16	15	9	17	14
			1	39-M-06-04	1	1	1	2	0	0	0	1	1	1	11	8	2	2	23	2	4	9	45	2	16	13	19	13	4	6	23	21	1	25	21	1	26	11	15	2	31	31	6	32	16	15	9	17	14
			2	39-M-06-04	12	13	18	14	0	0	0	18	4	32	37	30	8	10	4	29	4	14	57	2	16	13	19	13	4	6	28	2	28	30	18	2	29	7	27	4	6	1	20	1	4	17	28	1	14
			1	40-D-07-28	12	13	18	14	0	0	0	19	22	6	32	1	21	29	9	15	24	20	7	25	10	29	26	9	8	32	20	18	18	22	25	24	26	11	15	2	31	31	6	32	16	15	9	17	14
			2	40-D-07-28	1	1	1	2	0	0	0	2	4	32	37	30	8	10	4	29	4	14	57	2	16	13	19	13	23	30	23	21	1	25	21	1	26	11	15	2	31	31	6	32	16	15	9	17	14
			1	55-D-08-10	12	13	18	14	0	0	0	19	22	6	32	1	21	29	9	15	24	20	7	25	10	29	26	9	8	32	20	18	18	22	25	24	26	11	15	2	31	31	6	32	16	15	9	17	14
			2	55-D-08-10	12	13	18	14	0	0	0	19	22	6	32	1	21	29	9	15	24	20	7	25	10	29	26	10	23	30	23	21	1	25	21	1	26	11	15	2	31	31	6	32	16	15	9	17	14
			1	80-M-09-17	12	13	18	2	0	0	0	1	1	1	11	8	2	2	23	2	4	9	63	19	22	1	18	42	9	43	4	11	31	12	10	37	16	25	30	7	13	2	2	1	4	17	28	1	14
			2	80-M-09-17	1	1	1	2	0	0	0	2	4	32	37	30	8	10	4	29	4	14	57	2	16	13	19	13	4	6	28	2	28	30	18	2	29	7	27	4	6	1	20	1	4	16	22	4	26
			1	D-08-20	1	1	1	2	0	0	0	1	1	1	11	8	2	2	23	2	4	9	63	19	22	1	18	42	9	43	4	11	31	12	10	37	16	25	30	7	13	2	1	30	20	13	6	8	10
			2	D-08-20	13	16	12	29	0	0	0	29	9	21	6	11	4	32	6	21	4	14	57	2	16	13	19	13	4	6	28	2	28	30	18	2	29	7	27	4	7	31	6	32	16	15	9	17	14
			1	M-05-07	1	1	1	2	0	0	0	1	1	1	11	8	2	2	23	2	4	9	63	19	22	1	18	42	9	43	4	11	31	14	21	1	26	11	15	2	31	31	6	32	16	15	9	17	14
			2	M-05-07	12	13	18	14	0	0	0	19	22	6	32	1	21	29	9	15	24	20	7	25	10	29	26	9	8	32	20	18	18	22	25	24	26	11	15	2	31	31	6	33	4	17	28	1	14
			1	81-M-09-05	12	13	18	14	0	0	0	19	22	6	32	1	21	29	9	15	24	20	7	25	10	29	26	8	9	43	4	11	31	12	10	37	16	25	30	7	13	2	1	30	20	13	6	8	10
			2	81-M-09-05	13	16	12	29	0	0	0	29	9	21	6	11	4	32	6	22	30	17	50	11	4	22	23	15	8	32	20	18	18	22	25	24	26	11	15	2	31	31	6	32	16	15	9	17	14
2006-2014			1	103-D-11-17	1	1	1	2	0	0	0	1	1	1	11	8	2	2	23	2	4	9	63	19	22	1	18	42	9	43	4	11	31	12	10	37	16	25	30	7	13	2	1	30	20	13	6	8	10
			2	103-D-11-17	13	16	12	29	0	0	0	29	9	21	6	11	4	32	6	22	30	17	50	11	4	21	19	13	4	6	28	2	28	30	18	2	29	7	27	4	7	31	6	32	16	15	9	17	14
			1	112-D-10-29	12	13	18	1	0	0	0	2	4	32	37	30	8	10	4	29	4	14	8	18	4	26	10	21	27	41	39	23	28	30	18	2	29	7	27	4	6	1	20	1	4	16	22	4	26
			2	112-D-10-29	12	13	18	14	0	0	0	19	22	6	32	1	21	29	9	15	24	20	7	25	10	29	26	10	23	30	23	21	1	25	21	1	26	11	15	2	31	31	6	32	16	15	9	17	14
			1	45-D-07-24	12	13	18	14	0	0	0	19	22	6	32	1	21	29	9	15	24	20	7	25	10	29	26	9	8	32	20	18	18	22	25	24	26	11	15	2	31	31	6	32	16	15	9	17	14
			2	45-D-07-24	13	16	12	29	0	0	0	29	9	21	6	11	4	32	6	22	30	17	50	17	4	22	23	15	8	32	20	18	18	22	25	24	26	11	15	2	31	31	6	32	16	15	9	17	14
			1	48-D-08-21	1	1	1	2	0	0	0	2	4	32	37	30	8	10	4	29	4	14	57	2	16	13	19	13	4	6	28	2	28	30	18	2	29	7	27	4	6	1	20	1	4	17	28	3	10
			2	48-D-08-21	12	13	18	14	0	0	0	19	22	6	32	1	21	29	9	15	24	20	7	25	10	29	26	9	8	32	20	18	18	22	25	24	26	11	15	2	31	31	6	32	16	15	9	17	14
			1	51-D-07-09	1	1	1	2	0	0	0	1	1	1	11	8	2	2	23	2	4	9	63	19	22	1	18	42	9	43	4	11	31	12	10	37	16	25	30	7	13	2	1	30	20	13	6	8	10
			2	51-D-07-09	13	16	12	29	0	0	0	29	9	21	6	11	4	32	6	22	30	17	50	11	4	22	23	15	8	32	20	18	18	22	25	25	16	25	30	7	13	2	1	30	20	13	6	8	10
			1	52-D-07-17	1	1	1	2	0	0	0	1	1	1	11	8	2	2	23	2	4	9	63	19	22	1	18	42	9	43	4	11	31	12	10	37	16	25	30	7	13	2	1	30	20	13	6	8	10
			2	52-D-07-17	13	16	12	29	0	0	0	29	9	21	6	11	4	32	6	22	30	17	50	11	4	22	23	15	8	32	20	18	18	22	25	24	26	11	15	2	31	31	6	32	16	15	9	17	14
			1	53-D-08-08	1	1	1	2	0	0	0	1	1	1	11	8	2	2	23	2	4	9	63	19	22	1	18	42	9	43	4	11	31	12	10	37	16	25	30	7	13	2	1	30	20	13	6	8	10
			2	53-D-08-08	1	1	1	2	0	0	0	1	1	1	11	8	2	2	23	2	4	9	63	19	22	1	18	42	9	43	4	11	31	12	10	37	16	25	30	7	13	2	1	30	20	13	6	8	10
			1	54-M-07-06	1	1	1	2	0	0	0	2	4	32	37	30	8	10	4	29	4	14	57	2	16	13	19	13	4	6	28	2	28	30	18	2	29	7	27	4	6	1	20	1	4	17	28	3	10
			2	54-M-07-06	12	13	18	14	0	0	0	19	22	6	32	1	21	29	9	15	24	20	7	25	10	29	26	9	8	32	20	18	18	22	25	24	26	11	15	2	31	31	6	32	16	15	9	17	14
			1	56-D-07-16	12	13	18	14	0	0	0	19	22	6	32	1	21	29	9	15	24	20	7	25	10	29	26	9	8	32	20	18	18	22	25	24	26	11	15	2	31	31	6	32	16	15	9	17	14
			2	56-D-07-16	12	13	18	14	0	0	0	19	22	6	32	1	21	29	9	15	24	20	7	25	10	29	26	9	8	32	20	18	18	22	25	24	26	11	15	2	31	31	6	32	16	15	9	17	14
			1	D-08-19	1	1	1	2	0	0	0	1	1	1	11	8	2	2	23	2	4	9	63	19	22	1	18	42	9	43	4	11	31	12	10	37	16	25	30	7	13	2	1	30	20	13	6	8	10
			2	D-08-19	1	1	1	2	0	0	0	2	4	32	37	30	8	10	4	29	4	14	7	25	10	29	26	10	23	30	23	21	1	25	21	1	26	11	15	1	13	2	1	30	20	13	6	8	10
			1	102-G34-10	1	1	1	2	0	0	0	2	4	32	37	30	8	10	4	29	4	14	9	5	3	16	29	3	4	6	28	2	28	30	18	2	29	7	27	4	6	1	20	1	4	17	28	17	14
			2	102-G34-10	1	1	1	2	0	0	0	2	4	32	37	30	8	10	4	29	4	14	57	2	16	13	19	13	4	6	28	2	28	30	18	2	29	7	27	4	6	1	20	1	4	17	28	17	14
			1	111-G110-11	1	1	1	2	0	0	0	1	1	1	11	8	2	2	23	2	4	9	63	19	22	1	18	42	9	43	4	11	31	12	10	37	16	25	30	7	13	2	1	30	20	13	6	8	10
			2	111-G110-11	1	1	1	2	0	0	0	1	1	1	11	8	2	2	23	2	4	9	63	19	22	1	18	42	9	43	4	11	31	12	10	37	16	25	28	2	31	29	20	1	4	17	28	3	9
			1	61-G97-13	12	13	18	14	0	0	0	19	22	6	32	1	21	29	9	15	24	20	7	25	10	29	26	9	8	32	20	18	17	30	18	2	29	7	27	4	6	1	20	1	4	16	22	4	26
			2	61-G97-13	12	13	18	2	0	0	0	2	4	32	37	30	8	10	4	29	4	14	57	2	16	13	19	13	4	6	28	2	28	30	18	2	29	7	27	4	6	1	20	1	4	17	28	3	10
			1	62-G174-13	12	13	18	14	0	0	0	19	22	6	32	1	21	29	9	15	24	22	57	2	16	13	19	13	4	6	28	3	31	12	10	37	16	25	30	7	13	2	1	30	20	13	6	8	10
			2	62-G174-13	1	1	1	2	0	0	0	1	1	1	11	8	2	2	23	2	4	9	44	19	22	1	18	42	9	43	4	11	31	12	10	37	16	25	30	7	13	2	2	1	20	13	6	8	10
			1	68-D-10-68	13	16	12	29	0	0	0	29	9	21	6	11	4	32	6	21	4	14	57	2	16	13	19	13	4	6	28	2	28	30	18	2	29	7	27	4	7	31	6	32	16	15	9	17	14
			2	68-D-10-68	1	1	1	2	0	0	0	2	4	32	37	30	8	10	4	29	4	14	10	25	10	29	26	9	8	32	20	18	18	22	25	24	26	11	15	2	31	31	6	32	16	15	9	17	14
			1	69-D-10-15	1	1	1	2	0	0	0	2	4	32	37	30	8	10	4	29	4	14	56	5	3	16	29	3	4	1	4	11	31	12	10	37	16	25	30	7	13	2	1	30	20	13	28	1	14
			2	69-D-10-15	1	1	1	2	0	0	0	1	1	1	11	8	2	2	23	2	4	9	63	19	22	1	18	42	9	43	4	11	31	12	10	37	16	25	30	7	13	2	1	30	20	13	6	8	10
			1	108-D-10-44	12	13	18	14	0	0	0	19	22	6	32	1	21	29	9	15	24	20	7	25	10	29	26	9	8	32	20	18	18	22	25	24	26	11	15	2	31	31	6	32	16	15	9	17	14
			2	108-D-10-44	1	1	1	2	0	0	0	1	1	1	11	8	2	2	23	2	4	9	63	19	22	1	18	42	9	43	4	11	31	12	10	37	16	25	30	7	13	2	1	30	20	13	28	1	14
			1	70-D-10-23	1	1	1	2	0	0	0	2	4	32	37	30	8	10	9	15	24	20	7	25	10	29	26	9	8	32	20	18	18	22	25	24	26	11	15	2	31	31	6	32	16	15	9	17	14
			2	70-D-10-23	12	13	18	14	0	0	0	19	22	6	32	1	21	29	9	15	24	20	7	25	10	29	26	9	8	32	20	18	18	22	25	24	26	11	15	2	31	31	6	32	16	15	9	17	14
			1	92-G58-15	1	1	1	2	0	0	0	1	1	1	11	8	2	2	23	2	4	9	63	19	22	1	18	42	9	43	5	18	18	22	25	24	26	10	27	4	7	31	6	32	16	15	9	17	14
			2	92-G58-15	1	1	1	2	0	0	0	1	1	1	11	8	2	2	23	2	4	9	63	19	22	1	18	42	9	43	5	18	18	22	25	24	29	7	27	4	6	1	20	2	20	13	6	8	10
			1	73-D-11-22	1	1	1	2	0	0	0	2	4	32	37	30	8	10	4	29	4	14	57	2	16	13	19	13	4	6	28	2	28	30	18	2	29	7	27	4	6	1	20	1	4	17	28	3	10
			2	73-D-11-22	12	13	18	14	0	0	0	19	22	6	32	1	21	29	9	15	24	20	7	25	10	29	26	10	8	32	20	18	18	22	25	24	26	11	15	2	31	30	20	1	4	16	22	4	26
			1	77-G87-12	12	13	18	14	0	0	0	19	22	6	32	1	21	29	9	15	24	20	7	25	10	29	26	9	8	32	20	18	18	22	25	24	26	11	15	2	31	31	6	32	16	15	9	17	14
			2	77-G87-12	12	13	18	14	0	0	0	19	22	6	32	1	21	29	9	15	24	21	57	1	4	22	23	15	8	32	20	18	18	22	25	24	26	11	15	2	31	31	6	32	16	15	9	17	14
			1	78-D-11-58	1	1	1	2	0	0	0	2	4	32	37	30	8	10	4	29	4	14	57	2	16	13	19	13	4	6	28	2	28	30	18	2	29	7	27	4	5	31	6	32	16	15	9	17	14
			2	78-D-11-58	12	13	18	14	0	0	0	19	22	6	32	1	21	29	9	15	24	20	7	25	10	29	26	10	23	30	23	21	1	25	21	1	26	11	15	2	31	31	6	32	16	15	9	17	14
			1	86-G126-13	1	1	1	2	0	0	0	2	4	32	37	30	8	10	4	29	4	14	57	2	16	13	19	13	9	43	4	11	33	22	25	24	26	11	15	2	31	31	6	32	16	15	9	17	14
			2	86-G126-13	13	16	12	29	0	0	0	29	9	21	6	11	4	32	6	22	30	17	50	11	4	22	23	15	8	32	20	18	18	22	25	24	26	11	15	2	31	31	6	32	16	15	9	17	14
			1	88-G50-12	1	1	1	2	0	0	0	2	4	32	37	30	8	10	4	29	4	14	57	2	16	13	19	13	4	6	28	2	28	30	18	2	29	7	27	4	6	1	20	1	5	13	6	8	10
			2	88-G50-12	1	1	1	2	0	0	0	2	4	32	37	30	8	10	4	29	4	14	7	25	10	29	26	9	8	32	20	18	18	22	25	24	26	11	15	2	31	31	6	32	16	15	9	17	14
			1	91-G24-14	1	1	1	3	0	0	0	1	1	1	11	8	2	2	23	2	4	9	63	19	22	1	18	42	9	43	4	11	31	12	10	37	16	25	30	7	13	2	1	30	20	13	28	17	14
			2	91-G24-14	1	1	1	2	0	0	0	1	1	1	11	8	2	2	23	X	4	14	57	2	16	13	19	13	4	6	28	2	28	30	18	2	29	7	27	4	6	1	20	1	4	17	28	3	10
			1	95-G175-13	1	1	1	2	0	0	0	2	4	32	37	30	8	10	4	29	4	14	57	2	16	13	19	13	4	6	28	2	28	30	18	2	29	7	27	4	6	1	20	1	5	13	6	8	10
			2	95-G175-13	12	13	18	14	0	0	0	19	22	6	32	1	21	29	9	15	24	20	7	25	10	29	26	9	8	32	20	18	18	22	25	24	26	11	15	2	31	31	6	32	16	15	9	17	14
			1	97-G32-12	12	13	18	2	0	0	0	2	4	32	37	30	8	10	4	29	4	14	57	2	16	13	19	13	4	6	28	2	28	30	18	2	29	7	27	4	6	1	20	1	4	16	22	4	26
			2	97-G32-12	12	13	18	14	0	0	0	19	22	6	32	1	21	29	9	15	24	20	7	25	10	29	26	9	8	32	20	18	18	22	25	24	26	11	15	2	31	31	6	32	16	15	9	17	14
			1	D-10-50	1	1	1	2	0	0	0	1	1	1	11	8	2	2	23	2	4	9	63	19	22	1	18	42	9	42	28	2	28	30	18	2	29	7	27	4	6	1	20	1	4	16	22	4	26
			2	D-10-50	13	16	12	29	0	0	0	29	9	21	6	11	4	32	6	22	30	17	50	11	4	22	23	15	8	32	20	18	18	22	25	24	26	11	15	2	31	31	6	32	16	15	9	17	14
Founder haplotype assignment:
Female founder			1	F_1	1	1	1	2	7	7	7	1	1	1	11	8	2	2	23	2	4	9	63	19	22	1	18	42	9	43	4	11	31	12	10	37	16	25	30	7	13	2	1	30	20	13	6	8	10
			2	F_2	12	13	18	2	7	7	7	2	4	32	37	30	8	10	4	29	4	14	8	18	4	26	10	21	27	41	39	23	24	29	30	17	7	22	17	12	34	10	41	19	26	21	18	26	27
First male founder			1	M1_1	13	16	12	29	7	7	7	29	9	21	6	11	4	32	6	22	30	17	50	11	4	22	23	15	8	32	20	18	18	22	25	24	26	11	15	2	31	31	6	32	16	15	9	17	14
			2	M1_2	12	13	18	14	7	7	7	19	22	6	32	1	21	29	9	15	24	20	7	25	10	29	26	10	23	30	23	21	1	25	21	3	19	2	6	15	17	18	22	19	26	21	18	26	30
Second male founder			1	M2_1	1	1	1	2	7	7	7	2	4	32	37	30	8	10	4	29	4	14	57	2	16	13	19	13	4	6	28	2	28	30	18	2	29	7	27	4	6	1	20	1	4	17	28	1	14
			2	M2_2	1	1	1	2	7	7	7	2	4	32	37	30	8	10	4	29	4	14	56	5	3	16	29	11	20	46	32	39	30	32	5	28	40	14	18	29	26	19	11	25	4	16	22	4	26
[truncated: 41 more columns]

## Sheet: chr3_1Mb
				window:	0	1	2	3	4	5	6	7	8	9	10	11	12	13	14	15	16	17	18	19	20	21	22	23	24	25	26	27	28	29	30	31	32	33	34	35	36	37	38	39	40	41	42	43	44
Female founder			1	D-85-01	14	1	13	8	14	13	19	6	19	30	3	26	1	16	27	4	33	3	21	19	14	12	23	14	7	20	2	30	4	26	22	9	21	12	28	25	28	28	12	27	7	17	2	18	22
			2	D-85-01	2	11	8	19	22	9	1	17	10	1	1	29	4	10	29	22	15	1	3	13	27	16	6	35	25	26	26	6	2	21	30	23	34	14	15	17	12	2	12	29	7	17	2	20	16
1983-1993	First male founder	F1 offspring	1	D-84-03	14	12	3	5	7	7	10	13	26	21	10	18	7	34	36	20	19	5	15	8	3	1	15	3	10	4	7	4	13	27	17	28	27	27	6	7	3	14	3	29	7	18	10	16	35
			2	D-84-03	2	11	8	19	22	9	1	17	10	1	1	29	4	10	29	22	15	1	3	13	27	16	6	35	25	26	26	6	2	21	30	23	34	14	17	25	28	28	12	27	7	17	2	18	22
			1	D-85-02	1	8	2	1	17	1	2	14	21	4	7	2	1	15	18	1	31	5	15	8	3	1	15	3	1	2	1	29	27	2	8	1	5	3	22	14	1	2	12	30	22	12	12	1	39
			2	D-85-02	2	11	8	19	22	9	1	17	10	1	1	29	4	10	29	22	15	1	3	13	27	16	6	35	25	26	26	6	2	21	30	23	34	14	15	17	12	2	12	29	7	17	2	20	16
			1	3-D-86-01	14	1	13	8	14	13	19	6	19	30	3	26	1	16	27	4	33	3	21	19	14	12	23	14	7	20	2	30	4	26	22	9	21	12	28	25	28	28	12	27	7	17	2	18	22
			2	3-D-86-01	14	12	3	5	7	7	10	13	26	21	10	18	7	34	36	20	19	5	15	8	3	1	15	3	1	2	1	29	27	2	8	1	5	3	22	14	1	2	12	30	22	12	12	1	39
		F2 offspring	1	4-D-89-01	14	12	3	5	7	7	10	13	26	21	10	18	7	34	36	20	19	5	15	8	3	1	15	3	10	4	7	4	13	27	17	28	27	27	6	7	3	14	3	29	7	18	10	16	35
			2	4-D-89-01	14	12	3	5	7	7	10	13	26	21	10	18	7	34	36	20	18	1	3	13	27	16	6	35	25	26	26	6	2	21	30	23	34	14	15	17	12	2	12	29	7	17	2	20	16
			1	5-D-91-01	14	12	3	5	7	7	10	13	26	21	10	18	7	34	36	20	19	5	15	8	3	1	15	3	10	4	7	4	13	27	17	29	34	14	15	17	12	2	12	29	7	17	2	20	16
			2	5-D-91-01	2	11	8	19	22	9	1	17	10	1	1	29	4	10	29	22	15	1	3	13	27	16	6	35	25	26	26	6	2	21	30	23	34	14	15	17	12	2	12	29	7	17	2	20	16
			1	16-D-89-03	14	12	3	5	7	7	10	13	26	21	10	18	7	34	36	20	19	5	15	8	3	1	15	3	10	4	7	4	13	27	17	28	27	27	6	7	3	14	3	29	7	18	10	16	35
			2	16-D-89-03	2	11	8	19	22	9	1	17	10	1	1	29	4	10	29	22	15	1	3	13	27	16	6	35	25	26	26	6	2	21	30	23	34	14	15	17	12	2	12	29	7	17	2	20	16
			1	17-D-92-05	14	1	13	8	14	13	19	6	19	30	3	26	1	16	27	3	31	5	15	8	3	1	15	3	1	2	1	29	27	2	8	1	5	3	22	14	1	2	12	30	22	12	12	1	39
			2	17-D-92-05	14	12	3	5	7	7	10	13	26	21	10	18	7	34	36	20	19	5	15	8	3	1	15	3	10	4	7	4	13	27	17	28	27	27	6	7	3	14	3	29	7	18	10	16	36
			1	30-D-93-02	14	1	13	8	14	13	19	6	19	30	3	26	1	16	27	4	33	3	21	19	14	12	23	14	7	20	2	30	4	26	22	9	21	12	28	25	28	28	12	27	7	17	2	18	22
			2	30-D-93-02	14	12	3	5	7	7	10	13	26	21	10	18	7	34	36	20	19	5	15	8	3	1	15	3	10	4	7	4	13	27	17	28	27	27	6	7	3	14	3	29	7	18	10	16	35
		F3 offspring	1	6-M-98-02	14	1	13	8	14	13	19	6	19	30	3	26	1	16	27	3	31	5	15	8	3	1	15	3	1	2	1	29	27	2	8	1	5	3	22	14	1	2	12	30	22	12	12	1	39
			2	6-M-98-02	2	11	8	19	22	9	1	17	10	1	1	29	4	10	29	22	15	1	3	13	27	16	6	35	25	26	26	6	2	21	30	23	34	14	15	17	12	2	12	29	7	17	2	20	16
			1	31-D-93-03	14	12	3	5	7	7	10	13	26	21	10	18	7	34	36	20	19	5	15	8	3	1	15	3	10	4	7	4	13	27	17	28	27	27	6	7	3	14	3	29	7	18	10	16	35
			2	31-D-93-03	14	1	13	8	14	13	19	6	19	30	3	26	1	16	27	3	30	1	3	13	27	16	6	35	25	26	26	6	2	21	30	23	34	14	15	17	12	2	12	29	7	17	2	20	16
			1	19-D-94-01	14	1	13	8	14	13	19	6	19	30	3	26	1	16	27	3	31	5	15	8	3	1	15	3	1	2	1	29	27	2	8	1	5	3	22	14	1	2	12	30	22	12	12	1	39
			2	19-D-94-01	2	11	8	19	22	9	1	17	10	1	1	29	4	10	29	22	15	1	3	13	27	16	6	35	25	26	26	6	2	21	30	23	34	14	15	17	12	2	12	29	7	17	2	20	16
			1	57-D-92-06	14	12	3	5	7	7	10	13	26	20	1	29	4	10	29	22	15	1	3	13	27	16	6	35	25	26	26	6	2	21	30	23	34	14	15	17	12	2	12	29	7	17	2	20	16
			2	57-D-92-06	2	11	8	19	22	9	1	17	10	1	1	29	4	10	29	22	15	1	3	13	27	16	6	35	25	26	26	6	2	21	30	23	34	14	15	17	12	2	12	29	7	17	2	20	16
	Second male founder	F1 offspring	1	94-D-92-01	1	8	2	1	17	1	2	14	21	4	7	2	1	15	18	1	31	5	15	8	3	1	15	3	1	2	1	29	27	2	8	1	5	3	22	14	1	2	12	30	22	12	12	1	39
			2	94-D-92-01	9	2	13	8	15	20	23	11	3	7	10	18	7	34	36	20	19	5	15	8	3	1	16	22	17	24	4	26	15	31	10	33	2	23	4	21	28	28	12	27	7	17	2	18	21
			1	59-D-96-01	1	6	9	7	10	10	14	8	1	4	7	7	12	25	7	14	13	2	25	26	2	23	30	24	17	24	4	26	23	24	28	4	13	33	9	13	23	18	14	21	2	2	26	27	32
			2	59-D-96-01	2	11	8	19	22	9	1	17	10	1	1	29	4	10	29	22	15	1	3	13	27	16	6	35	25	26	26	6	2	21	30	23	34	14	15	17	12	2	12	30	22	12	12	1	39
			1	43-D-92-02	1	8	2	1	17	1	2	14	21	4	7	2	1	15	18	1	31	5	15	8	3	1	15	3	1	2	1	29	27	2	8	1	5	3	22	14	1	2	12	30	22	12	12	1	39
			2	43-D-92-02	9	2	13	8	15	20	23	11	3	7	10	18	7	34	36	20	19	5	15	8	3	1	16	22	17	24	4	26	15	31	10	33	2	23	4	21	28	28	12	27	7	17	2	18	21
			1	D-93-01	9	2	13	8	15	20	23	11	3	7	10	18	7	34	36	20	19	5	15	8	3	1	16	22	17	24	4	26	15	31	10	33	2	23	4	21	28	28	12	27	7	17	2	18	21
			2	D-93-01	2	11	8	19	22	9	1	17	10	1	1	29	4	10	29	22	15	1	3	13	27	16	6	35	25	26	26	6	2	21	30	23	34	14	15	17	12	2	12	29	7	17	2	20	15
			1	8492	1	8	2	1	17	1	2	14	21	4	7	2	1	15	18	1	31	5	15	8	3	1	15	3	1	2	1	29	27	2	8	1	5	3	22	14	1	2	12	30	22	12	12	1	39
			2	8492	1	6	9	7	10	10	14	8	1	4	7	7	12	25	7	14	13	2	25	26	2	23	30	24	17	24	4	26	23	24	28	4	13	33	9	13	23	18	14	21	2	2	26	27	32
			1	22-D-99-02	1	8	2	1	17	1	2	14	21	4	7	2	1	15	18	1	31	5	15	8	4	16	6	35	25	26	26	6	2	21	30	23	34	14	15	17	12	2	12	29	7	17	2	20	15
			2	22-D-99-02	1	6	9	7	10	10	14	8	1	4	7	7	12	25	7	14	13	2	25	26	2	23	30	24	17	24	4	26	23	24	28	4	13	33	9	13	23	18	14	21	2	2	26	27	32
			1	11-M-98-03	9	2	13	8	15	22	14	8	1	4	7	7	12	25	7	14	13	2	25	26	2	23	30	24	17	24	4	26	23	24	28	4	13	33	9	13	23	18	14	21	2	2	26	27	32
			2	11-M-98-03	1	8	2	1	17	1	2	14	21	4	7	1	4	10	29	22	15	1	3	13	27	16	6	35	25	26	26	6	2	21	30	23	34	14	15	17	12	2	12	29	7	17	2	20	15
1994-2005			1	Varg0109	9	2	13	8	15	22	14	8	1	4	7	7	12	25	7	14	13	2	25	26	2	23	30	24	17	24	4	26	23	24	28	4	13	33	9	13	23	18	14	21	2	2	26	27	32
			2	Varg0109	2	11	8	19	22	9	1	17	10	1	1	29	4	10	29	22	15	1	3	13	27	16	6	35	25	26	26	6	2	21	30	23	34	14	15	17	12	2	12	29	7	17	2	20	16
			1	105-D-00-15	14	1	13	8	14	13	19	6	19	30	3	26	1	16	27	1	31	5	15	8	3	1	15	3	1	2	1	29	27	2	8	1	5	3	22	14	1	2	12	30	22	12	12	1	39
			2	105-D-00-15	1	6	9	7	10	10	14	8	1	4	7	7	12	25	6	3	31	5	15	8	3	1	15	3	1	2	1	29	27	2	8	1	5	3	22	14	1	2	12	30	22	12	12	1	39
			1	12-M-01-04	14	12	3	5	7	7	10	13	26	21	10	18	7	34	36	20	19	5	15	8	3	1	15	3	10	4	7	4	13	27	17	28	27	27	6	7	3	14	3	29	7	18	10	16	35
			2	12-M-01-04	1	8	2	1	17	1	2	14	21	4	7	1	4	10	29	22	15	1	3	13	27	16	6	35	25	26	26	6	2	21	30	23	34	14	15	17	12	2	12	29	7	17	2	20	15
			1	14-M-00-09	1	6	9	7	10	10	14	8	1	4	7	7	12	25	7	14	13	2	25	26	2	23	30	24	17	24	4	26	23	24	28	4	13	33	9	13	23	18	14	21	2	2	26	27	32
			2	14-M-00-09	2	11	8	19	22	9	1	17	10	1	1	29	4	10	29	22	15	1	3	13	27	16	6	35	25	26	26	6	2	21	30	23	34	14	15	17	12	2	12	29	7	17	2	20	16
			1	15-M-01-10	9	2	13	8	15	22	14	8	1	4	7	7	12	25	7	14	13	2	25	26	2	23	30	24	17	24	4	31	2	21	30	23	34	14	15	17	12	2	12	29	7	17	2	20	15
			2	15-M-01-10	1	6	9	7	10	10	14	8	1	4	7	7	12	25	6	1	31	5	15	8	3	1	15	3	1	2	1	29	27	2	8	1	5	3	22	14	1	2	12	30	22	12	12	1	39
			1	28-M-03-07	14	1	13	8	14	13	19	6	19	30	3	26	1	16	27	3	31	5	15	8	3	1	15	3	1	2	1	29	27	2	8	1	5	3	22	14	1	2	12	30	22	12	12	1	39
			2	28-M-03-07	2	11	8	19	22	9	1	17	10	1	1	29	4	10	29	22	15	1	3	13	27	16	6	35	25	26	26	6	2	21	30	23	34	14	15	17	12	2	12	29	7	17	2	20	16
			1	75-G9-05	9	2	13	8	15	22	14	8	1	4	7	14	12	28	29	1	31	5	15	8	3	1	15	3	1	2	1	29	27	2	8	1	5	3	22	14	1	2	12	30	22	12	12	1	39
			2	75-G9-05	1	8	2	1	17	1	2	14	21	4	7	7	1	15	18	22	15	1	3	13	27	16	6	35	25	26	26	6	2	21	30	23	34	14	15	17	12	2	12	29	7	17	2	20	15
			1	D-01-18	14	1	13	8	14	13	19	6	19	30	3	26	1	16	27	3	31	5	15	8	3	1	15	3	1	2	1	29	27	2	8	1	5	3	22	14	1	2	12	30	22	12	12	1	39
			2	D-01-18	1	6	9	7	10	10	14	8	1	4	7	7	12	25	7	14	13	2	25	26	2	23	30	24	17	24	4	26	23	24	28	4	13	33	9	13	23	18	14	21	2	2	26	27	32
			1	110-M-01-06	1	8	2	1	17	1	2	14	21	4	7	1	4	10	29	22	15	1	3	13	27	16	6	35	25	26	26	6	2	21	30	23	34	14	15	17	12	2	12	29	7	17	2	20	15
			2	110-M-01-06	1	8	2	1	17	1	2	14	21	4	7	1	4	10	29	22	15	1	3	13	27	16	6	35	25	26	26	6	2	21	30	23	34	14	15	17	12	2	12	29	7	17	2	20	15
			1	13-M-98-08	14	1	13	8	14	13	19	6	19	30	3	26	1	16	27	3	31	5	15	8	3	1	15	3	1	2	1	29	27	2	8	1	5	3	22	14	1	2	12	30	22	12	12	1	39
			2	13-M-98-08	1	8	2	1	17	1	2	14	21	4	7	1	4	10	29	22	15	1	3	13	27	16	6	35	25	26	26	6	2	21	30	23	34	14	15	17	12	2	12	29	7	17	2	20	15
			1	25-M-03-06	1	6	9	7	10	10	14	8	1	4	7	7	12	25	6	1	31	5	15	8	3	1	15	3	1	2	1	29	27	2	8	1	5	3	22	14	1	2	12	30	22	12	12	1	39
			2	25-M-03-06	1	8	2	1	17	1	2	14	21	4	7	2	1	15	18	1	31	5	15	8	3	1	15	3	1	2	1	29	27	3	10	33	2	23	4	21	28	28	12	27	7	17	2	18	21
			1	35-D-05-23	14	1	13	8	14	13	19	6	19	30	3	26	1	16	27	3	31	5	15	8	3	1	15	3	1	2	1	29	27	2	8	1	5	3	22	14	1	2	12	30	22	12	12	1	39
			2	35-D-05-23	14	12	3	5	7	7	10	13	26	21	10	18	7	34	36	20	19	5	15	8	3	1	15	3	10	4	7	4	13	27	17	28	27	27	6	7	3	14	3	29	7	18	10	16	35
			1	38-D-06-16	1	8	2	1	17	1	2	14	21	4	7	1	4	10	29	22	15	1	3	13	27	16	6	35	25	26	26	6	2	21	30	23	34	14	15	17	12	2	12	29	7	17	2	20	15
			2	38-D-06-16	1	8	2	1	17	1	2	14	21	4	7	4	4	10	29	22	15	1	3	13	27	16	6	35	25	26	26	6	2	21	30	23	34	14	15	17	12	2	12	29	7	17	2	20	16
			1	60-M-00-10	1	6	9	7	10	10	14	8	1	4	7	7	12	25	7	14	13	2	25	26	2	23	30	24	17	24	4	36	2	21	30	23	34	14	15	17	12	2	12	29	7	17	2	20	16
			2	60-M-00-10	2	11	8	19	22	9	1	17	10	1	1	29	4	10	29	22	15	1	3	13	27	16	6	35	25	26	26	6	2	21	30	23	34	14	15	17	12	2	12	29	7	17	2	20	16
			1	D-00-12	1	8	2	1	17	1	2	14	21	4	7	1	4	10	29	22	15	1	3	13	27	16	6	35	25	26	26	6	2	21	30	23	34	14	15	17	12	2	12	29	7	17	2	20	15
			2	D-00-12	2	11	8	19	22	9	1	17	10	1	1	29	4	10	29	22	15	1	3	13	27	16	6	35	25	26	26	6	2	21	30	23	34	14	15	17	12	2	12	29	7	17	2	20	16
			1	M-98-01	14	1	13	8	14	13	19	6	19	30	3	26	1	16	27	3	31	5	15	8	3	1	15	3	1	2	1	29	27	2	8	1	5	3	22	14	1	2	12	30	22	12	12	1	39
			2	M-98-01	2	11	8	19	22	9	1	17	10	1	1	29	4	10	29	22	15	1	3	13	27	16	6	35	25	26	26	6	2	21	30	23	34	14	15	17	12	2	12	29	7	17	2	20	16
			1	V009511	1	6	9	7	10	10	14	8	1	4	7	7	12	25	6	1	31	5	15	8	3	1	15	3	1	2	1	29	27	2	8	1	5	4	4	21	28	28	12	27	7	17	2	18	21
			2	V009511	1	8	2	1	17	1	2	14	21	4	7	2	1	15	18	1	31	5	15	8	3	1	15	3	1	2	1	29	27	2	8	1	5	3	22	14	1	2	12	30	22	12	12	1	39
			1	106-D-10-20	9	2	13	8	15	20	23	11	3	7	8	2	1	15	18	1	31	5	15	8	3	1	15	3	1	2	1	29	27	2	8	1	5	3	22	14	1	2	12	30	22	12	12	1	39
			2	106-D-10-20	2	11	8	19	22	9	1	17	10	1	1	29	4	10	29	22	15	1	3	13	27	16	6	35	27	24	4	31	2	21	30	23	34	14	15	17	12	2	12	29	7	17	2	20	15
			1	109-D-10-30	14	12	3	5	7	7	10	13	26	21	10	18	7	34	36	20	19	5	15	8	3	1	15	3	10	4	7	4	13	27	17	28	27	27	6	7	3	14	3	29	7	18	10	16	35
			2	109-D-10-30	2	11	8	19	22	9	1	17	10	1	1	29	4	10	29	22	15	1	3	13	27	16	6	35	25	26	26	6	2	21	30	23	34	14	15	17	12	2	12	29	7	17	2	20	15
			1	36-D-06-14	1	6	9	7	10	10	14	8	1	4	7	7	12	25	7	14	13	2	25	26	2	23	30	24	17	24	1	29	27	2	8	1	5	3	22	14	1	2	12	30	22	12	12	1	39
			2	36-D-06-14	1	8	2	1	17	1	2	14	21	4	7	1	4	10	29	22	15	1	3	13	27	16	6	35	25	26	26	6	2	21	30	23	34	14	15	17	12	2	12	29	7	17	2	20	15
			1	37-M-06-03	14	1	13	8	14	13	19	6	19	30	3	26	1	16	27	3	31	5	15	8	3	1	15	3	1	2	1	29	27	2	8	1	5	2	15	17	12	2	12	29	7	17	2	20	15
			2	37-M-06-03	14	1	13	8	14	13	19	6	19	30	3	26	1	16	27	3	31	5	15	8	3	1	15	3	1	2	1	29	27	2	8	1	5	3	22	14	1	2	12	30	22	12	12	1	39
			1	39-M-06-04	14	1	13	8	14	13	19	6	19	30	3	26	1	16	27	3	31	5	15	8	3	1	15	3	1	2	1	29	27	2	8	1	5	3	22	14	1	2	12	30	22	12	12	1	39
			2	39-M-06-04	14	1	13	8	14	13	19	6	19	30	3	26	1	16	27	3	31	5	15	8	3	1	15	3	1	2	1	29	27	2	8	1	5	3	22	14	1	2	12	30	22	12	12	1	39
			1	40-D-07-28	1	8	2	1	17	1	2	14	21	4	7	4	4	10	29	22	15	1	3	13	27	16	6	35	25	26	26	6	2	21	30	23	34	14	15	17	12	2	12	29	7	17	2	20	16
			2	40-D-07-28	2	11	8	19	22	9	1	17	10	1	1	29	4	10	29	22	15	1	3	13	27	16	6	35	25	26	26	6	2	21	30	23	34	14	15	17	12	2	12	29	7	17	2	20	16
			1	55-D-08-10	1	8	2	1	17	1	2	14	21	4	7	4	4	10	29	22	15	1	3	13	27	16	6	35	25	26	26	6	2	21	30	23	34	14	15	17	12	2	12	29	7	17	2	20	16
			2	55-D-08-10	2	11	8	19	22	9	1	17	10	1	1	29	4	10	29	22	15	1	3	13	27	16	6	35	25	26	26	6	2	21	30	23	34	14	15	17	12	2	12	29	7	17	2	20	15
			1	80-M-09-17	1	8	2	1	17	1	2	14	21	4	7	2	1	15	18	1	31	5	15	8	3	1	15	3	1	2	1	29	27	2	8	1	5	3	22	14	1	2	12	30	22	12	12	1	39
			2	80-M-09-17	2	11	8	19	22	9	1	17	10	1	1	29	4	10	29	22	15	1	3	13	27	16	6	35	27	24	4	31	2	21	30	23	34	14	15	17	12	2	12	29	7	17	2	20	15
			1	D-08-20	9	2	13	8	15	22	14	8	1	4	7	7	12	25	7	14	13	2	25	26	2	23	30	24	17	24	4	26	23	24	28	4	13	33	9	13	23	18	14	21	2	2	26	27	32
			2	D-08-20	2	11	8	19	22	9	1	17	10	1	1	29	4	10	29	22	15	1	3	13	27	16	6	35	25	26	26	6	13	27	17	28	27	27	6	7	3	14	3	29	7	18	10	16	35
			1	M-05-07	14	1	13	8	14	13	19	6	19	30	3	26	1	16	27	3	31	5	15	8	3	1	15	3	1	2	1	29	27	2	8	1	5	3	22	14	1	2	12	30	22	12	12	1	39
			2	M-05-07	14	1	13	8	14	13	19	6	19	30	3	26	1	16	27	3	31	5	15	8	3	1	15	3	1	2	1	29	27	2	8	1	5	3	22	14	1	2	12	30	22	12	12	1	39
			1	81-M-09-05	1	6	9	7	10	10	14	8	1	4	7	7	12	25	7	14	13	2	25	26	2	23	30	24	17	24	4	26	15	31	10	33	2	23	4	21	28	28	12	27	7	17	2	18	21
			2	81-M-09-05	1	8	2	1	17	1	2	14	21	4	7	1	4	10	29	22	15	1	3	13	27	16	6	34	1	2	1	29	27	2	8	1	5	3	22	14	1	2	12	30	22	12	12	1	39
2006-2014			1	103-D-11-17	1	6	9	7	10	10	14	8	1	4	7	7	12	25	6	1	31	5	15	8	3	1	15	3	1	2	1	29	27	2	8	1	5	3	22	14	1	2	12	30	22	12	12	1	39
			2	103-D-11-17	9	2	13	8	15	22	14	8	1	4	7	7	12	25	7	14	13	2	25	26	2	23	30	25	10	4	7	4	13	27	17	28	27	27	6	7	3	14	3	29	7	18	10	16	35
			1	112-D-10-29	9	2	13	8	15	22	14	8	1	4	7	2	1	15	18	1	31	5	15	8	3	1	15	3	1	2	1	29	27	2	8	1	5	3	22	14	1	2	12	30	22	12	12	1	39
			2	112-D-10-29	2	11	8	19	22	9	1	17	10	1	1	29	4	10	29	22	15	1	3	13	27	16	6	35	27	24	4	31	2	21	30	23	34	14	15	17	12	2	12	29	7	17	2	20	15
			1	45-D-07-24	14	12	3	5	7	7	10	13	26	21	10	18	6	15	18	1	31	5	15	8	3	1	16	22	17	24	4	26	15	31	10	33	2	23	4	21	28	28	12	27	16	17	2	18	21
			2	45-D-07-24	1	8	2	1	17	1	2	14	21	4	7	2	1	15	18	1	31	5	15	8	4	16	6	35	25	26	26	6	2	21	30	23	34	14	15	17	12	2	12	29	7	17	2	20	15
			1	48-D-08-21	1	6	9	7	10	10	14	8	1	4	7	7	12	25	6	1	31	5	15	8	3	1	15	3	1	2	1	29	27	2	8	1	5	3	22	14	1	2	12	30	22	12	12	1	39
			2	48-D-08-21	9	2	13	8	15	22	14	8	1	4	7	7	12	28	29	22	15	1	3	13	27	16	6	35	25	26	26	6	2	21	30	23	34	14	15	17	12	2	12	30	22	12	12	1	39
			1	51-D-07-09	9	2	13	8	15	22	14	8	1	4	7	7	12	25	6	1	31	5	15	8	3	1	15	3	1	2	1	29	27	2	8	1	5	3	22	14	1	2	12	30	22	12	12	1	39
			2	51-D-07-09	1	8	2	1	17	1	2	14	21	4	7	1	4	10	29	22	15	1	3	13	27	16	6	35	25	26	26	6	2	21	30	23	34	14	15	17	12	2	12	29	7	17	2	20	15
			1	52-D-07-17	9	2	13	8	15	22	14	8	1	4	7	7	12	25	6	1	31	5	15	8	3	1	15	3	1	2	1	29	27	2	8	1	5	3	22	14	1	2	12	30	22	12	12	1	39
			2	52-D-07-17	9	2	13	8	15	22	14	8	1	4	7	7	12	25	7	14	13	2	25	26	2	23	30	24	17	24	4	26	23	24	28	4	13	33	9	13	23	18	14	21	2	2	26	27	32
			1	53-D-08-08	9	2	13	8	15	22	14	8	1	4	7	7	12	25	6	1	31	5	15	8	3	1	15	3	1	2	1	29	27	2	8	1	5	3	22	14	1	2	12	30	22	12	12	1	39
			2	53-D-08-08	9	2	13	8	15	22	14	8	1	4	7	7	12	25	7	14	13	2	25	26	2	23	30	24	17	24	4	26	23	24	28	4	13	33	10	17	12	2	12	29	7	17	2	20	15
			1	54-M-07-06	1	8	2	1	17	1	2	14	21	4	7	1	4	10	29	22	15	1	3	13	27	16	6	35	25	26	26	6	2	21	30	23	34	16	22	14	1	2	12	30	22	12	12	1	39
			2	54-M-07-06	1	8	2	1	17	1	2	14	21	4	7	1	4	10	29	22	15	1	3	13	27	16	6	35	25	26	26	6	2	21	30	23	34	14	15	17	12	2	12	29	7	17	2	20	15
			1	56-D-07-16	1	8	2	1	17	1	2	14	21	4	7	1	4	10	29	22	15	1	3	13	27	16	6	35	25	26	26	6	2	21	30	23	34	14	15	17	12	2	12	29	7	17	2	20	16
			2	56-D-07-16	1	8	2	1	17	1	2	14	21	4	7	4	4	10	29	22	15	1	3	13	27	16	6	35	25	26	26	6	2	21	30	23	34	14	15	17	12	2	12	29	7	17	2	20	16
			1	D-08-19	9	2	13	8	15	22	14	8	1	4	7	7	12	25	7	14	13	2	25	26	2	23	30	24	17	24	4	26	23	24	28	4	13	33	9	13	23	18	14	21	2	2	26	27	32
			2	D-08-19	1	8	2	1	17	1	2	14	21	4	7	1	4	10	29	22	15	1	3	13	27	16	6	35	25	26	26	6	2	21	30	23	34	14	15	17	12	2	12	29	7	17	2	20	15
			1	102-G34-10	9	2	13	8	15	20	23	11	3	7	10	18	7	34	36	20	19	5	15	8	3	1	16	22	17	24	4	26	15	31	10	33	2	23	4	21	28	28	12	27	7	17	2	18	21
			2	102-G34-10	2	11	8	19	22	9	1	17	10	1	1	29	4	10	29	22	15	1	3	13	27	16	6	35	25	26	26	6	2	21	30	23	34	14	15	17	12	2	12	29	7	17	2	20	15
			1	111-G110-11	1	8	2	1	17	1	2	14	21	4	7	2	1	15	18	1	31	5	15	8	3	1	15	3	1	2	1	29	27	2	8	1	5	3	22	14	1	2	12	30	22	12	12	1	39
			2	111-G110-11	9	2	13	8	15	22	14	8	1	4	7	7	12	28	29	22	15	1	3	13	27	16	6	35	25	26	26	6	2	21	30	23	34	14	15	17	12	2	12	29	7	17	2	20	15
			1	61-G97-13	1	8	2	1	17	1	2	14	21	4	7	2	1	15	18	1	31	5	15	8	3	1	15	3	1	2	4	31	2	21	30	23	34	14	15	17	12	2	12	29	7	17	2	20	15
			2	61-G97-13	2	11	8	19	22	9	1	17	10	1	1	29	4	10	29	22	15	1	3	13	27	16	6	35	27	24	4	31	2	21	30	23	34	14	15	17	12	2	12	29	7	17	2	20	6
			1	62-G174-13	1	6	9	7	10	10	14	8	1	4	7	7	12	25	6	1	31	5	15	8	3	1	15	3	1	2	1	29	27	4	28	4	13	33	9	13	23	18	14	21	2	2	26	27	32
			2	62-G174-13	2	11	8	19	22	9	1	17	10	1	1	29	4	10	29	22	15	1	3	13	27	16	6	35	27	24	4	31	2	21	30	23	34	14	15	17	12	2	12	29	7	17	2	20	15
			1	68-D-10-68	1	8	2	1	17	1	2	14	21	4	7	1	4	10	29	22	15	1	3	13	27	16	6	35	25	26	26	6	2	21	30	23	34	14	15	17	12	2	12	29	7	17	2	20	16
			2	68-D-10-68	2	11	8	19	22	9	1	17	10	1	1	29	4	10	29	22	15	1	3	13	27	16	6	35	25	26	26	6	13	27	17	28	27	27	6	7	3	14	3	29	7	18	10	16	35
			1	69-D-10-15	14	12	3	5	7	7	10	13	26	21	10	18	7	34	36	20	19	5	15	8	3	1	15	3	10	4	7	4	13	27	17	28	27	27	6	7	3	14	3	29	7	17	2	20	16
			2	69-D-10-15	2	11	8	19	22	9	1	17	10	1	1	29	4	10	29	22	15	1	3	13	27	1	15	3	10	4	7	4	13	27	17	28	27	27	6	7	3	14	3	29	7	18	10	16	35
			1	108-D-10-44	14	12	3	5	7	7	10	13	26	21	10	18	7	34	36	20	19	5	15	8	3	1	17	35	25	26	26	6	2	21	30	23	34	14	15	17	12	2	12	29	7	17	2	20	16
			2	108-D-10-44	2	11	8	19	22	9	1	17	10	1	1	29	4	10	29	22	15	1	3	13	27	16	6	35	25	26	26	6	2	21	30	23	34	14	15	17	12	2	12	29	7	17	2	20	16
			1	70-D-10-23	14	12	3	5	7	7	10	13	26	21	10	18	7	34	36	20	19	5	15	8	3	1	15	3	10	4	7	4	13	27	17	28	27	27	6	7	3	14	3	29	7	17	2	20	16
			2	70-D-10-23	14	12	3	5	7	7	10	13	26	21	10	18	7	34	36	20	19	5	15	8	3	1	15	3	10	4	7	4	13	27	17	28	27	27	6	7	3	14	3	29	7	18	10	16	35
			1	92-G58-15	9	2	13	8	15	22	14	8	1	4	7	7	12	25	8	3	31	5	15	8	3	1	15	3	1	2	1	29	27	2	8	1	5	3	22	14	1	2	12	30	22	12	12	1	39
			2	92-G58-15	2	11	8	19	22	9	1	17	10	1	1	29	4	10	29	22	15	1	3	13	27	16	6	35	25	26	26	6	2	21	30	23	34	14	15	17	12	2	12	30	22	12	12	1	39
			1	73-D-11-22	1	8	2	1	17	1	2	14	21	4	7	1	4	10	29	22	15	1	3	13	27	16	6	35	25	26	26	6	2	21	30	23	34	14	15	17	12	2	12	30	22	12	12	1	39
			2	73-D-11-22	1	8	2	1	17	1	2	14	21	4	7	1	4	10	29	22	15	1	3	13	27	16	6	35	25	26	26	6	2	21	30	23	34	16	22	14	1	2	12	30	22	12	12	1	39
			1	77-G87-12	9	2	13	8	15	22	14	8	1	4	7	6	12	25	7	14	13	2	25	26	2	23	30	24	17	24	4	31	2	21	30	23	34	14	15	17	12	2	12	29	7	17	2	20	15
			2	77-G87-12	14	12	3	5	7	7	10	13	26	21	10	18	7	34	36	20	19	5	15	8	3	1	15	3	10	4	7	4	13	27	17	28	27	27	6	7	3	14	3	29	7	18	10	16	35
			1	78-D-11-58	1	8	2	1	17	1	2	14	21	4	7	1	4	10	29	2	31	5	15	8	3	1	15	3	1	2	1	29	27	2	8	1	5	3	22	14	1	2	12	30	23	17	2	20	15
			2	78-D-11-58	1	8	2	1	17	1	2	14	21	4	7	2	1	15	18	22	15	1	3	13	27	16	6	35	25	26	26	6	2	21	30	23	34	14	15	17	12	2	12	29	7	17	2	20	15
			1	86-G126-13	14	12	13	8	14	13	19	6	19	30	3	26	1	16	27	3	31	5	15	8	3	1	15	3	1	2	1	29	27	2	8	1	5	3	22	14	12	2	12	30	22	12	12	1	39
			2	86-G126-13	1	8	2	1	17	1	2	14	21	4	7	1	4	10	29	22	15	1	3	13	27	16	6	35	25	26	26	9	23	24	28	4	13	33	9	13	23	18	14	21	2	2	26	27	5
			1	88-G50-12	1	8	2	1	17	1	2	14	21	4	7	2	1	15	18	1	31	5	15	8	3	1	15	3	1	2	1	29	27	2	8	1	5	3	22	14	1	2	12	30	22	12	12	1	39
			2	88-G50-12	2	11	8	19	22	9	1	17	10	1	1	29	4	10	29	22	15	1	3	13	27	16	6	35	24	2	1	29	27	2	8	1	6	14	15	17	12	2	12	29	7	17	2	20	16
			1	91-G24-14	14	12	3	5	7	7	10	13	26	21	10	18	7	34	36	20	19	5	15	8	3	1	15	3	10	4	7	4	13	27	17	28	27	27	6	7	3	14	3	29	7	18	10	20	15
			2	91-G24-14	1	8	2	1	17	1	2	14	21	4	7	1	4	10	29	22	15	1	3	13	27	16	6	35	25	26	26	6	2	21	30	23	34	16	22	14	1	2	12	30	22	12	12	2	16
			1	95-G175-13	1	8	2	1	17	1	2	14	21	4	7	2	1	15	18	1	31	5	15	8	3	1	15	3	1	2	1	29	27	2	8	1	5	3	22	14	1	2	12	30	22	12	12	1	39
			2	95-G175-13	2	11	8	19	22	9	1	17	10	1	1	29	4	10	29	22	15	1	3	13	27	16	6	35	24	2	1	29	27	2	8	1	6	14	15	17	12	2	12	29	7	17	2	20	16
			1	97-G32-12	1	8	2	1	17	1	2	14	21	4	7	2	1	15	18	1	31	5	15	8	3	1	15	3	1	2	1	29	27	2	8	1	5	3	22	14	1	2	12	30	22	12	12	1	39
			2	97-G32-12	2	11	8	19	22	9	1	17	10	1	1	29	4	10	29	22	15	1	3	13	27	16	6	35	27	24	4	31	2	21	30	23	34	14	15	17	12	2	12	29	7	17	2	20	15
			1	D-10-50	9	2	13	8	15	22	14	8	1	4	7	7	12	28	29	22	15	1	3	13	27	16	6	35	25	26	26	6	2	21	30	23	34	16	22	14	1	2	12	30	22	12	12	1	39
			2	D-10-50	1	8	2	1	17	1	2	14	21	4	7	1	4	10	29	22	15	1	3	13	27	16	6	35	25	26	26	6	2	21	30	23	34	14	15	17	12	2	12	29	7	17	2	20	15
Founder haplotype assignment:
Female founder			1	F_1	14	1	13	8	14	13	19	6	19	30	3	26	1	16	27	4	33	3	21	19	14	12	23	14	7	20	2	30	4	26	22	9	21	12	28	25	28	28	12	27	7	17	2	18	22
			2	F_2	2	11	8	19	22	9	1	17	10	1	1	29	4	10	29	22	15	1	3	13	27	16	6	35	25	26	26	6	2	21	30	23	34	14	15	17	12	2	12	29	7	17	2	20	16
First male founder			1	M1_1	14	12	3	5	7	7	10	13	26	21	10	18	7	34	36	20	19	5	15	8	3	1	15	3	10	4	7	4	13	27	17	28	27	27	6	7	3	14	3	29	7	18	10	16	35
			2	M1_2	1	8	2	1	17	1	2	14	21	4	7	2	1	15	18	1	31	5	15	8	3	1	15	3	1	2	1	29	27	2	8	1	5	3	22	14	1	2	12	30	22	12	12	1	39
Second male founder			1	M2_1	9	2	13	8	15	20	23	11	3	7	10	18	7	34	36	20	19	5	15	8	3	1	16	22	17	24	4	26	15	31	10	33	2	23	4	21	28	28	12	27	7	17	2	18	21
			2	M2_2	1	6	9	7	10	10	14	8	1	4	7	7	12	25	7	14	13	2	25	26	2	23	30	24	17	24	4	26	23	24	28	4	13	33	9	13	23	18	14	21	2	2	26	27	32
[truncated: 47 more columns]

## Sheet: chr4_1Mb
				window:	0	1	2	3	4	5	6	7	8	9	10	11	12	13	14	15	16	17	18	19	20	21	22	23	24	25	26	27	28	29	30	31	32	33	34	35	36	37	38	39	40	41	42	43	44
Female founder			1	D-85-01	21	12	1	7	18	2	21	19	23	19	3	22	35	1	16	6	1	24	25	4	18	22	1	1	1	31	25	21	1	18	2	3	7	4	3	26	12	33	5	17	6	17	29	4	20
			2	D-85-01	17	3	1	16	9	16	13	10	4	9	8	5	11	1	9	25	6	9	12	26	18	23	25	4	13	5	7	33	32	29	21	11	19	24	19	18	30	25	25	11	11	12	15	41	3
1983-1993	First male founder	F1 offspring	1	D-84-03	18	7	6	4	3	12	5	4	25	16	15	25	4	27	37	9	14	9	12	31	30	19	3	2	4	8	12	3	37	11	18	19	27	21	4	7	6	12	16	28	27	32	1	44	22
			2	D-84-03	17	3	1	16	9	16	13	10	4	9	8	5	11	1	9	25	6	9	12	26	18	23	25	4	13	5	7	33	32	29	21	11	19	24	19	18	30	25	25	11	11	12	15	41	3
			1	D-85-02	21	12	1	7	18	2	21	19	23	19	3	22	35	1	16	6	1	24	25	4	18	23	25	4	13	5	7	33	32	29	21	11	19	24	19	18	30	25	25	11	11	12	15	41	3
			2	D-85-02	18	7	6	4	3	12	5	4	25	16	15	25	4	27	37	9	14	9	12	29	27	28	2	8	6	1	28	30	20	6	12	31	8	9	8	1	20	19	25	9	12	26	26	36	36
			1	3-D-86-01	21	12	1	7	18	2	21	19	23	19	3	22	35	1	16	6	1	24	25	4	18	22	1	1	1	31	25	21	1	18	2	3	7	4	3	26	12	33	5	17	6	17	29	4	20
			2	3-D-86-01	18	7	6	4	3	12	5	4	25	16	15	25	4	27	37	9	14	9	12	29	27	28	2	8	6	1	28	30	20	6	12	31	8	9	8	1	20	19	25	9	12	26	26	36	36
		F2 offspring	1	4-D-89-01	18	7	6	4	3	12	5	4	25	16	15	25	6	1	16	6	1	24	25	4	18	22	1	1	1	31	25	21	1	18	2	3	7	4	3	26	12	33	5	17	6	17	29	4	20
			2	4-D-89-01	21	12	1	7	19	11	10	17	13	17	10	18	8	17	24	22	21	27	22	11	30	18	1	1	1	31	25	21	1	18	2	3	7	4	3	26	12	33	5	17	6	17	29	4	20
			1	5-D-91-01	21	12	1	7	18	2	21	19	23	19	3	22	35	1	16	6	1	24	25	4	18	22	1	1	1	31	25	21	1	18	2	3	7	4	3	26	12	33	5	17	6	17	29	4	20
			2	5-D-91-01	10	13	14	5	2	11	10	17	13	17	10	18	8	17	24	22	21	27	22	11	30	19	3	2	4	8	12	3	37	11	18	19	27	21	4	7	6	12	16	28	27	32	1	44	22
			1	16-D-89-03	18	7	6	4	3	12	5	4	25	16	15	25	4	27	37	9	14	9	12	29	27	28	2	8	6	1	28	30	20	6	12	31	8	9	8	1	20	19	25	9	12	26	26	36	36
			2	16-D-89-03	18	7	6	4	3	12	5	4	25	16	15	25	4	27	37	9	14	9	12	29	27	28	2	8	6	1	28	30	20	6	12	31	8	9	8	1	20	19	25	9	12	26	26	36	36
			1	17-D-92-05	18	7	6	4	3	12	5	4	25	16	15	25	4	27	37	9	14	9	12	29	27	28	2	8	6	1	28	30	20	6	12	31	8	9	8	1	20	19	25	9	12	26	26	36	36
			2	17-D-92-05	10	13	14	5	2	11	10	17	13	17	10	18	8	17	24	22	21	27	22	11	30	19	3	2	4	8	12	3	37	11	18	19	27	21	4	7	6	12	5	17	6	17	29	4	20
			1	30-D-93-02	10	13	14	5	2	11	10	17	13	17	10	18	8	17	24	22	21	27	22	11	30	19	3	2	4	8	12	3	37	11	18	19	27	21	4	7	6	12	16	28	27	32	1	44	22
			2	30-D-93-02	21	12	1	7	18	2	21	19	23	19	2	18	8	17	24	22	21	27	22	11	30	19	3	2	4	8	12	3	37	11	18	19	27	21	4	7	6	12	16	28	27	32	1	44	22
		F3 offspring	1	6-M-98-02	21	12	1	7	18	2	21	19	23	19	3	22	35	1	16	6	1	24	25	4	18	22	1	1	1	31	25	21	1	18	2	3	7	4	3	26	12	33	5	17	6	20	1	44	22
			2	6-M-98-02	10	13	14	5	2	11	10	17	13	17	10	18	8	17	24	22	21	27	22	11	30	19	3	2	4	8	12	3	37	11	18	19	27	21	4	7	6	12	5	17	6	17	29	4	20
			1	31-D-93-03	21	12	1	7	18	2	21	19	23	19	3	22	35	1	16	6	1	24	25	4	18	19	3	2	4	8	12	3	37	11	18	19	27	21	4	7	6	12	5	17	6	17	29	4	20
			2	31-D-93-03	21	12	1	7	18	2	21	19	23	19	3	22	35	1	16	6	1	24	25	4	18	22	1	1	1	31	25	21	1	18	2	3	7	4	3	26	12	33	5	17	6	17	29	4	20
			1	19-D-94-01	21	12	1	7	18	2	21	19	23	19	3	22	35	1	16	6	1	24	25	4	18	22	1	1	1	31	25	21	1	18	2	3	7	4	3	26	12	33	5	17	6	17	29	4	20
			2	19-D-94-01	10	13	14	5	2	11	10	17	13	17	10	18	8	17	24	22	21	27	22	11	30	19	3	2	4	8	12	3	37	11	18	19	27	21	4	7	6	12	5	17	6	17	29	4	20
			1	57-D-92-06	18	7	6	4	3	12	5	4	25	16	15	25	4	27	37	9	14	9	12	29	27	28	2	8	6	1	28	30	20	6	12	31	8	9	8	1	20	19	25	9	12	26	26	36	36
			2	57-D-92-06	10	13	14	5	2	11	10	17	13	17	10	18	8	17	24	22	21	27	22	11	30	19	3	2	4	8	12	3	37	11	18	19	27	21	4	7	6	12	5	17	6	17	29	4	20
	Second male founder	F1 offspring	1	94-D-92-01	16	3	9	12	15	8	8	13	18	20	13	29	30	13	19	17	12	11	2	24	12	6	6	19	19	20	12	3	37	11	18	19	27	21	4	7	6	12	16	28	27	32	1	45	15
			2	94-D-92-01	10	13	14	5	2	11	10	17	13	17	10	18	8	17	24	22	21	27	22	11	30	19	3	2	4	10	7	33	32	29	21	11	19	24	19	18	30	25	25	11	11	12	15	41	3
			1	59-D-96-01	16	3	9	12	15	8	8	13	18	20	13	29	30	13	19	17	12	11	2	24	12	6	6	19	19	20	12	3	37	11	18	19	27	21	4	7	6	12	16	28	27	32	1	45	15
			2	59-D-96-01	17	3	1	16	9	16	13	10	4	9	8	5	11	1	9	25	6	9	12	26	18	23	25	4	13	5	7	33	32	29	21	11	19	24	19	18	30	25	25	11	11	12	15	41	3
			1	43-D-92-02	16	3	9	12	15	8	8	13	18	20	13	29	30	13	19	17	12	11	2	24	12	6	6	19	19	20	12	3	37	11	18	19	27	21	4	7	6	12	16	28	27	32	1	45	15
			2	43-D-92-02	17	3	1	16	9	16	13	10	4	9	8	5	11	1	9	25	6	9	12	26	18	23	25	4	13	5	7	33	32	29	21	11	19	24	19	18	30	25	25	11	11	12	15	41	3
			1	D-93-01	16	3	9	12	15	8	8	13	18	20	13	29	31	8	38	17	12	11	2	24	12	6	6	19	19	20	12	3	37	11	18	19	27	21	4	7	6	12	16	28	27	32	1	45	15
			2	D-93-01	10	13	14	5	2	11	10	17	13	17	10	18	8	17	24	22	21	27	22	11	30	19	3	2	4	8	12	3	37	11	18	19	27	21	4	7	6	12	16	28	27	32	1	44	22
			1	8492	16	3	9	12	15	8	8	13	18	20	13	29	30	13	19	17	12	11	2	24	12	6	6	19	19	20	12	3	37	11	18	19	27	21	4	7	6	12	16	28	27	32	1	45	15
			2	8492	10	13	14	5	2	11	10	17	13	17	10	18	8	17	24	22	21	27	22	11	30	19	3	2	4	8	12	3	37	11	18	19	27	21	4	7	6	12	25	11	11	12	15	41	3
			1	22-D-99-02	10	13	14	5	2	11	10	17	13	17	10	18	8	17	24	22	21	27	22	11	30	19	3	2	4	8	12	3	37	11	18	19	27	21	4	7	6	12	16	28	27	32	2	41	3
			2	22-D-99-02	16	3	9	12	15	8	8	13	18	20	13	29	30	13	19	17	12	11	2	24	12	6	6	19	19	20	12	3	37	11	18	19	27	21	4	7	6	12	16	28	27	32	1	45	15
			1	11-M-98-03	16	3	9	12	15	8	8	13	18	20	13	29	30	13	19	17	12	11	2	24	12	6	6	19	19	20	12	3	37	11	18	19	27	21	4	7	6	12	16	28	27	32	1	45	15
			2	11-M-98-03	10	13	14	5	2	11	10	17	13	17	10	18	8	17	24	22	21	27	22	11	30	19	3	2	4	8	12	3	37	11	18	19	27	21	4	7	6	12	16	28	27	32	1	44	22
1994-2005			1	Varg0109	16	3	9	12	15	8	8	13	18	20	13	29	30	13	19	17	12	11	2	24	12	6	6	19	19	20	12	3	37	11	18	19	27	21	4	7	6	12	16	28	27	32	1	44	22
			2	Varg0109	21	12	1	7	18	2	21	19	23	19	3	22	35	2	24	22	21	27	22	11	30	19	3	2	4	8	12	3	37	11	18	19	27	21	4	7	6	12	5	17	6	17	29	4	20
			1	105-D-00-15	10	13	14	5	2	11	10	17	13	17	10	18	8	17	24	22	21	27	22	11	30	19	3	2	4	8	12	3	37	11	18	19	27	21	4	7	6	12	5	17	6	17	29	4	20
			2	105-D-00-15	17	3	1	16	9	16	13	10	4	9	8	5	11	1	9	25	6	9	12	26	18	23	25	4	13	5	7	33	32	29	21	11	19	24	19	18	30	25	24	28	27	32	1	44	22
			1	12-M-01-04	21	12	1	7	18	2	21	19	23	19	3	22	35	1	16	6	1	24	25	4	18	22	1	1	1	31	25	21	1	18	2	3	7	4	3	26	12	33	5	17	6	20	1	44	22
			2	12-M-01-04	16	3	9	12	15	8	8	13	18	20	13	29	30	13	19	17	12	11	2	24	12	6	6	19	19	20	12	3	37	11	18	19	27	21	4	7	6	12	16	28	27	32	1	45	15
			1	14-M-00-09	17	3	1	16	9	16	13	10	4	9	8	5	11	1	9	20	12	11	2	24	12	6	6	19	19	20	12	3	37	11	18	19	27	21	4	7	6	12	16	28	27	32	1	45	15
			2	14-M-00-09	10	13	14	5	2	11	10	17	13	17	10	18	8	17	24	22	21	27	22	11	30	19	3	2	4	8	12	3	37	11	18	19	27	21	4	7	6	12	5	17	6	17	29	9	36
			1	15-M-01-10	21	12	1	7	18	2	21	19	23	19	3	22	35	1	16	6	1	24	25	4	18	22	1	1	1	31	25	21	1	18	2	3	7	4	3	26	12	33	5	17	6	20	1	44	22
			2	15-M-01-10	17	3	1	16	9	16	13	10	4	9	8	5	11	1	9	25	6	9	12	26	18	23	25	4	13	5	7	33	32	29	21	11	19	24	19	18	30	25	24	28	27	32	1	44	22
			1	28-M-03-07	16	3	9	12	15	8	8	13	18	20	13	29	30	13	19	17	12	11	2	24	12	6	6	19	19	20	12	3	37	11	18	19	27	21	4	7	6	12	16	28	27	32	1	45	15
			2	28-M-03-07	17	3	1	16	9	16	13	10	4	9	8	5	11	1	9	22	21	27	22	11	30	19	3	2	4	8	12	3	37	11	18	19	27	21	4	7	6	12	5	17	6	17	29	4	20
			1	75-G9-05	16	3	9	12	15	8	8	13	18	20	13	29	30	13	19	17	12	11	2	24	12	6	6	19	19	20	12	3	37	11	18	19	27	21	4	7	6	12	16	28	27	32	1	45	15
			2	75-G9-05	10	13	14	5	2	11	10	17	13	17	10	18	8	17	24	22	21	27	22	11	30	19	3	2	4	8	12	3	37	11	18	19	27	21	4	7	6	12	16	28	27	32	1	45	15
			1	D-01-18	18	7	6	4	3	12	5	4	25	16	15	25	4	27	37	9	14	9	12	29	27	28	2	8	6	1	28	30	20	6	12	31	8	9	8	1	20	19	25	9	12	26	26	36	36
			2	D-01-18	16	3	9	12	15	8	8	13	18	20	13	29	30	13	19	17	12	11	2	24	12	6	6	19	19	20	12	3	37	11	18	19	27	21	4	7	6	12	16	28	27	32	1	45	15
			1	110-M-01-06	21	12	1	7	18	2	21	19	23	19	3	22	35	1	16	6	1	24	25	4	18	22	1	1	1	31	25	21	1	18	2	3	7	4	3	26	12	33	5	17	6	20	1	44	22
			2	110-M-01-06	21	12	1	7	18	2	21	19	23	19	3	22	35	1	16	6	1	24	25	4	18	22	1	1	1	31	25	21	1	18	2	3	7	4	3	26	12	33	5	17	6	20	1	44	22
			1	13-M-98-08	10	13	14	5	2	11	10	17	13	17	10	18	8	17	24	22	21	27	22	11	30	19	3	2	4	8	12	3	37	11	18	19	27	21	4	7	6	12	16	28	27	32	1	44	22
			2	13-M-98-08	16	3	9	12	15	8	8	13	18	20	13	29	30	13	19	17	12	11	2	24	12	6	6	19	19	20	12	3	37	11	18	19	27	21	4	7	6	12	5	17	6	17	29	4	20
			1	25-M-03-06	17	3	1	16	9	16	13	10	4	9	8	5	11	1	9	25	6	9	12	26	18	23	25	4	13	5	7	33	32	29	21	11	19	24	19	18	30	25	24	28	27	32	1	44	22
			2	25-M-03-06	17	3	1	16	9	16	13	10	4	9	8	5	11	1	9	25	6	9	12	26	18	23	25	4	13	5	7	33	32	29	21	11	19	24	19	18	30	25	25	11	11	12	15	41	3
			1	35-D-05-23	18	7	6	4	3	12	5	4	25	16	15	25	4	27	37	9	14	9	12	29	27	28	2	8	6	1	28	30	20	6	12	31	8	9	8	1	20	19	25	9	12	26	26	36	36
			2	35-D-05-23	18	7	6	4	3	12	5	4	25	16	15	25	4	27	37	9	14	9	12	29	27	28	2	8	6	1	28	30	20	6	12	31	8	9	8	1	20	19	25	9	12	26	26	36	36
			1	38-D-06-16	16	3	9	12	15	8	8	13	18	20	13	29	30	13	19	17	12	11	2	24	12	6	6	19	19	20	12	3	37	11	18	19	27	21	4	7	6	12	16	28	27	32	1	44	22
			2	38-D-06-16	16	3	9	12	15	8	8	13	18	20	13	29	30	13	19	17	12	11	2	24	12	6	6	19	19	20	12	3	37	11	18	19	27	21	4	7	6	12	16	28	27	32	1	45	15
			1	60-M-00-10	21	12	1	7	18	2	21	19	23	19	3	22	35	1	16	6	1	24	25	4	18	22	1	1	1	31	25	21	1	18	2	3	7	4	3	26	12	34	25	9	12	26	26	36	36
			2	60-M-00-10	17	3	1	16	9	16	13	10	4	9	8	5	11	1	9	20	12	11	2	24	12	6	6	19	19	20	12	3	37	11	18	19	27	21	4	7	6	12	16	28	27	32	1	45	15
			1	D-00-12	21	12	1	7	18	2	21	19	23	19	3	22	35	1	16	6	1	24	25	4	18	22	1	1	1	31	25	22	37	11	18	19	27	21	4	7	6	12	16	28	27	32	1	44	22
			2	D-00-12	16	3	9	12	15	8	8	13	18	20	13	29	30	13	19	17	12	11	2	24	12	6	6	19	19	20	12	3	37	11	18	19	27	21	4	7	6	12	16	28	27	32	1	44	22
			1	M-98-01	21	12	1	7	18	2	21	19	23	19	3	22	35	1	16	6	1	24	25	4	18	22	1	1	1	31	25	21	1	18	2	3	7	4	3	26	12	33	5	17	6	20	1	44	22
			2	M-98-01	10	13	14	5	2	11	10	17	13	17	10	18	8	17	24	22	21	27	22	11	30	19	3	2	4	8	12	3	37	11	18	19	27	21	4	7	6	12	16	28	27	32	1	44	22
			1	V009511	21	12	1	7	18	2	21	19	23	19	3	22	35	1	16	6	1	24	25	4	18	22	1	1	1	31	25	21	1	18	2	3	7	4	3	26	12	33	5	17	6	20	1	44	22
			2	V009511	17	3	1	16	9	16	13	10	4	9	8	5	11	1	9	25	6	9	12	26	18	23	25	4	13	5	7	33	32	29	21	11	19	24	19	18	30	25	25	11	11	12	15	41	3
			1	106-D-10-20	17	3	1	16	9	16	13	10	4	9	8	7	35	1	16	6	1	24	25	4	18	22	1	1	1	31	25	21	1	18	2	3	7	4	3	26	12	33	5	17	6	20	1	44	22
			2	106-D-10-20	17	3	1	16	9	16	13	10	4	9	8	5	11	1	9	25	6	9	12	26	18	23	25	4	13	5	7	33	32	29	21	11	19	24	19	18	30	25	25	11	11	12	15	41	3
			1	109-D-10-30	16	3	9	12	15	8	8	13	18	20	13	29	30	13	19	17	12	11	2	24	12	6	6	19	19	20	12	3	37	11	18	19	27	21	4	7	6	12	16	28	27	32	1	45	15
			2	109-D-10-30	16	3	9	12	15	8	8	13	18	20	13	29	30	13	19	17	12	11	2	24	12	6	6	19	19	20	12	3	37	11	18	19	27	21	4	7	6	12	16	28	27	32	1	45	15
			1	36-D-06-14	18	7	6	4	3	12	5	4	25	16	15	25	4	27	37	9	14	9	12	29	27	28	2	8	6	1	28	30	20	6	12	31	8	9	8	1	20	19	25	9	12	26	26	36	36
			2	36-D-06-14	10	13	14	5	2	11	10	17	13	17	10	18	8	17	24	22	21	27	22	11	30	19	3	2	4	8	12	3	37	11	18	19	27	21	4	7	6	12	16	28	27	32	1	45	15
			1	37-M-06-03	16	3	9	12	15	8	8	13	18	20	13	29	30	13	19	17	12	11	2	24	12	6	6	19	19	20	12	3	37	11	18	19	27	21	4	7	6	12	5	17	6	17	29	10	22
			2	37-M-06-03	10	13	14	5	2	11	10	17	13	17	10	18	8	17	24	22	21	27	22	11	30	19	3	2	4	8	12	3	37	11	18	19	27	21	4	7	6	12	16	28	27	32	1	44	22
			1	39-M-06-04	16	3	9	12	15	8	8	13	18	20	13	29	30	13	19	17	12	11	2	24	12	6	6	19	19	20	12	3	37	11	18	19	27	21	4	7	6	12	5	17	6	17	29	10	22
			2	39-M-06-04	10	13	14	5	2	11	10	17	13	17	10	18	8	17	24	22	21	27	22	11	30	19	3	2	4	8	12	3	37	11	18	19	27	21	4	7	6	12	16	28	27	32	1	44	22
			1	40-D-07-28	21	12	1	7	18	2	21	19	23	19	3	22	35	1	16	6	1	24	25	4	18	22	1	1	1	31	25	21	1	18	2	3	7	4	3	26	12	33	5	17	6	20	1	44	22
			2	40-D-07-28	16	3	9	12	15	8	8	13	18	20	13	29	30	13	19	17	12	11	2	24	12	6	6	19	19	20	12	3	37	11	18	19	27	21	4	7	6	12	16	28	27	32	1	44	22
			1	55-D-08-10	16	3	9	12	15	8	8	13	18	20	13	29	30	13	19	17	12	11	2	24	12	6	6	19	19	20	12	3	37	11	18	19	27	21	4	7	6	12	16	28	27	32	1	44	22
			2	55-D-08-10	16	3	9	12	15	8	8	13	18	20	13	29	30	13	19	17	12	11	2	24	12	6	6	19	19	20	12	3	37	11	18	19	27	21	4	7	6	12	16	28	27	32	1	45	15
			1	80-M-09-17	21	12	1	7	18	2	21	19	23	19	3	22	35	1	16	6	1	24	25	4	18	22	1	1	1	31	25	21	1	18	2	3	7	4	3	26	12	33	5	17	6	21	1	44	22
			2	80-M-09-17	17	3	1	16	9	16	13	10	4	9	8	5	11	1	9	26	12	11	2	24	12	6	6	19	19	20	12	3	37	11	18	19	27	21	4	7	6	12	16	28	27	32	1	19	15
			1	D-08-20	16	3	9	12	15	8	8	13	18	20	13	29	30	13	19	17	12	11	2	24	12	6	6	19	19	20	12	3	37	11	18	19	27	21	4	7	7	25	24	28	27	32	1	44	22
			2	D-08-20	21	12	1	7	18	2	21	19	23	19	3	22	35	2	24	22	21	27	22	11	30	19	3	2	4	8	12	3	37	11	18	19	27	21	4	7	6	12	5	17	6	17	29	4	20
			1	M-05-07	18	7	6	4	3	12	5	4	25	16	15	25	4	27	37	9	14	9	12	29	27	28	2	8	6	1	28	30	20	6	12	31	8	9	8	1	20	19	25	9	12	26	26	36	36
			2	M-05-07	16	3	9	12	15	8	8	13	18	20	13	29	30	13	19	17	12	11	2	24	12	6	6	19	19	20	12	3	37	11	18	19	27	21	4	7	6	12	16	28	27	32	1	45	15
			1	81-M-09-05	16	3	9	12	15	8	8	13	18	20	13	29	30	13	19	17	12	11	2	24	12	6	6	19	19	20	12	3	37	11	18	19	27	21	4	7	6	12	16	28	27	32	1	44	22
			2	81-M-09-05	17	3	1	16	9	16	13	10	4	9	8	5	11	1	9	25	6	9	12	26	18	23	25	1	13	5	7	33	31	6	12	31	8	9	8	1	20	19	25	9	12	26	26	36	36
2006-2014			1	103-D-11-17	18	7	6	4	3	12	5	4	25	16	15	25	4	27	37	9	14	9	12	29	27	28	2	8	6	1	28	30	20	6	12	31	8	9	8	1	20	19	25	9	12	26	26	36	36
			2	103-D-11-17	21	12	1	7	18	2	21	19	23	19	3	22	35	2	24	22	21	27	22	11	30	19	3	2	4	8	12	3	37	29	21	11	19	24	19	18	30	25	24	28	27	32	1	44	22
			1	112-D-10-29	10	13	14	5	2	11	10	17	13	17	10	18	8	17	24	22	21	27	22	11	30	19	3	2	4	8	12	3	37	11	18	19	27	21	4	7	6	12	16	28	27	32	1	45	15
			2	112-D-10-29	17	3	1	16	9	16	13	10	4	9	8	5	11	1	9	25	6	9	12	26	18	23	25	4	13	5	7	33	32	29	21	11	19	24	19	18	30	25	25	11	11	12	15	41	3
			1	45-D-07-24	16	3	9	12	15	8	8	13	18	20	13	29	30	13	19	17	12	11	2	24	11	22	2	1	1	31	25	21	1	11	18	19	27	21	4	7	6	12	16	28	27	32	1	45	15
			2	45-D-07-24	17	3	1	16	9	16	13	10	4	9	8	5	11	1	9	25	6	9	12	26	18	23	25	4	13	5	7	33	32	29	21	11	19	23	3	26	12	33	5	17	6	20	1	44	22
			1	48-D-08-21	17	3	1	16	9	16	13	10	4	9	8	5	11	1	9	25	6	9	12	26	18	23	25	4	13	5	7	33	31	6	12	31	8	9	8	1	20	19	25	9	12	26	26	36	36
			2	48-D-08-21	21	12	1	7	18	1	13	10	4	9	8	5	11	1	9	25	6	9	12	26	18	23	25	4	13	5	7	33	32	29	21	11	19	24	19	18	30	25	25	11	11	12	15	41	3
			1	51-D-07-09	16	3	9	12	15	8	8	13	18	20	13	29	30	13	19	17	12	11	2	24	11	22	2	8	6	1	28	30	20	6	12	31	8	9	8	1	20	19	23	17	6	20	1	44	22
			2	51-D-07-09	17	3	1	16	9	16	13	10	4	9	8	5	11	1	9	25	6	9	12	26	17	28	2	8	6	1	28	30	20	6	12	31	8	9	8	1	20	19	23	17	6	20	1	44	22
			1	52-D-07-17	18	7	6	4	3	12	5	4	25	16	15	25	4	27	37	9	14	9	12	29	27	28	2	8	6	1	28	30	20	6	12	31	8	9	8	1	20	19	23	17	6	20	1	44	22
			2	52-D-07-17	16	3	9	12	15	8	8	13	18	20	13	29	30	13	19	17	12	11	2	24	11	22	2	8	6	1	28	30	20	6	12	31	8	9	8	1	20	19	23	17	6	20	1	44	22
			1	53-D-08-08	18	7	6	4	3	12	5	4	25	16	15	25	4	27	37	9	14	9	12	29	27	28	2	8	6	1	28	30	20	6	12	31	8	9	8	1	20	19	23	17	6	20	1	44	22
			2	53-D-08-08	16	3	9	12	15	8	8	13	18	20	13	29	30	13	19	17	12	11	2	24	11	22	1	8	6	1	28	30	20	6	12	31	8	9	8	1	20	19	23	17	6	19	1	44	22
			1	54-M-07-06	10	13	14	5	2	11	10	17	13	17	10	18	8	17	24	22	21	27	22	11	30	19	3	2	4	8	12	3	37	11	18	19	27	21	4	7	6	12	5	17	6	17	29	4	20
			2	54-M-07-06	17	3	1	16	9	16	13	10	4	9	8	5	11	1	9	25	6	9	12	26	18	23	25	4	13	5	7	33	32	29	21	11	19	24	19	18	30	15	25	9	12	26	26	36	36
			1	56-D-07-16	21	12	1	7	18	2	21	19	23	19	3	22	35	1	16	6	1	24	25	4	18	22	1	1	1	31	25	21	1	18	2	3	7	4	3	26	12	33	5	17	6	20	1	44	22
			2	56-D-07-16	16	3	9	12	15	8	8	13	18	20	13	29	30	13	19	17	12	11	2	24	12	6	6	19	19	20	12	3	37	11	18	19	27	21	4	7	6	12	16	28	27	32	1	44	22
			1	D-08-19	10	13	14	5	2	11	10	17	13	17	10	18	8	17	24	22	21	27	22	11	30	19	3	2	4	8	12	3	37	11	18	19	27	21	4	7	6	12	16	28	27	32	1	45	15
			2	D-08-19	17	3	1	16	9	16	13	10	4	9	8	5	11	1	9	25	6	9	12	26	18	23	25	4	13	5	7	33	32	29	21	11	19	24	19	18	30	25	24	28	27	32	1	44	22
			1	102-G34-10	16	3	9	12	15	8	8	13	18	20	13	29	30	13	19	17	12	11	2	24	12	6	6	19	19	20	12	3	37	11	18	19	27	21	4	7	6	12	16	28	27	32	1	45	15
			2	102-G34-10	16	3	9	12	15	8	8	13	18	20	13	29	30	13	19	17	12	11	2	24	12	6	6	19	19	20	12	3	38	18	2	3	7	4	3	26	12	33	5	17	6	20	1	44	22
			1	111-G110-11	17	3	1	16	9	16	13	10	4	9	8	7	35	1	16	6	1	24	25	4	18	22	1	1	1	31	25	21	1	18	2	3	7	4	3	26	12	33	5	17	6	20	1	44	22
			2	111-G110-11	17	3	1	16	9	16	13	10	4	9	8	5	11	1	9	25	6	9	12	26	18	23	25	4	13	5	7	33	32	29	21	11	19	24	19	18	30	25	25	11	11	12	15	41	3
			1	61-G97-13	17	3	1	16	9	16	13	10	4	9	8	5	11	1	16	6	1	24	25	4	18	22	1	1	1	31	25	21	1	18	2	3	7	4	3	26	12	33	5	17	6	21	1	44	22
			2	61-G97-13	17	3	1	16	9	16	13	10	4	9	8	5	11	1	9	26	12	11	2	13	18	22	1	1	1	31	25	21	1	18	2	3	7	4	3	26	12	33	5	17	6	20	1	44	22
			1	62-G174-13	21	12	1	7	18	2	21	19	23	19	3	22	35	2	24	22	21	27	22	11	30	19	3	2	4	8	12	3	37	11	18	19	27	21	4	7	6	12	16	28	27	32	1	44	22
			2	62-G174-13	17	3	1	16	9	16	13	10	4	9	8	5	11	1	9	26	12	11	2	24	12	6	6	19	19	20	12	3	37	11	18	19	27	21	4	7	6	12	16	28	27	32	1	44	22
			1	68-D-10-68	21	12	1	7	18	2	21	19	23	19	3	22	35	1	16	6	1	24	25	4	18	22	1	1	1	31	25	21	1	18	2	3	7	4	3	26	12	33	5	17	6	20	1	44	22
			2	68-D-10-68	21	12	1	7	18	2	21	19	23	19	3	22	35	2	24	22	21	27	22	11	30	19	3	2	4	8	12	3	37	11	18	19	27	21	4	7	7	25	25	28	27	32	1	44	22
			1	69-D-10-15	16	3	9	12	15	8	8	13	18	20	13	29	30	13	19	17	12	11	2	24	12	6	6	19	19	20	12	3	37	11	18	19	27	21	4	7	6	12	5	17	6	17	29	4	20
			2	69-D-10-15	16	3	9	12	15	8	8	13	18	20	13	29	30	13	19	17	12	11	2	24	12	6	6	19	19	20	12	3	37	11	18	19	27	21	4	7	8	19	25	9	12	26	26	36	36
			1	108-D-10-44	16	3	9	12	15	8	8	13	18	21	8	5	11	1	9	22	21	27	22	11	30	19	3	2	4	8	12	3	37	11	18	19	27	21	4	7	6	12	5	17	6	17	29	4	20
			2	108-D-10-44	16	3	9	12	15	8	8	13	18	21	8	5	11	1	9	22	21	27	22	11	30	19	3	2	4	8	12	3	37	11	18	19	27	21	4	7	6	12	5	17	6	17	29	4	20
			1	70-D-10-23	16	3	9	12	15	8	8	13	18	20	13	29	30	13	19	17	12	11	2	24	12	6	6	19	19	20	12	3	37	11	18	19	27	21	4	7	6	12	5	17	6	17	29	4	20
			2	70-D-10-23	16	3	9	12	15	8	8	13	18	20	13	29	30	13	19	17	12	11	2	24	12	6	6	19	19	20	12	3	37	11	18	19	27	21	4	7	6	12	5	17	6	17	29	4	20
			1	92-G58-15	16	3	9	12	15	8	8	13	18	20	13	29	30	13	19	17	12	11	2	24	12	6	6	19	19	20	12	3	37	11	18	19	27	21	4	7	6	12	16	28	27	32	1	44	22
			2	92-G58-15	17	3	1	16	9	16	13	10	4	9	8	5	11	1	9	25	6	9	12	26	18	23	25	4	13	5	7	33	32	29	21	11	19	24	19	18	30	25	25	28	27	32	1	44	22
			1	73-D-11-22	16	3	9	12	15	8	8	13	18	20	13	29	30	13	19	17	12	11	2	24	12	6	6	19	19	20	12	3	39	6	12	31	8	9	8	1	20	19	25	9	12	26	26	36	36
			2	73-D-11-22	17	3	1	16	9	16	13	10	4	9	8	5	11	1	9	25	6	9	12	26	18	23	3	2	4	8	12	3	37	11	18	19	27	21	4	7	6	15	25	9	12	26	26	36	36
			1	77-G87-12	17	3	1	16	9	16	13	10	4	9	8	5	11	1	9	25	6	9	12	26	18	6	6	19	19	20	12	3	37	11	18	19	27	21	4	7	6	12	16	28	27	32	1	45	15
			2	77-G87-12	17	3	1	16	9	16	13	10	4	9	8	5	11	1	9	25	6	9	12	26	18	23	25	4	13	5	7	33	31	6	12	31	8	9	8	1	20	19	25	9	12	26	26	36	36
			1	78-D-11-58	17	3	1	16	9	16	13	10	4	9	8	7	35	1	16	6	1	24	25	4	18	22	1	1	1	31	25	21	1	18	2	3	7	4	3	26	12	33	5	17	6	20	1	44	22
			2	78-D-11-58	17	7	14	4	3	12	5	4	25	16	15	25	4	27	37	9	14	9	12	29	27	28	2	8	6	1	28	30	20	6	12	31	8	9	8	1	20	19	25	9	12	26	26	36	36
			1	86-G126-13	16	3	9	12	15	8	8	12	13	17	10	18	8	17	24	22	21	27	22	11	30	19	3	2	4	8	12	3	37	11	18	19	27	21	4	7	6	12	5	17	6	17	29	4	20
			2	86-G126-13	17	3	1	16	9	16	13	10	4	9	8	5	11	1	9	25	6	9	12	26	18	23	25	4	13	5	7	33	32	29	21	11	19	24	19	18	30	25	25	28	27	32	1	44	22
			1	88-G50-12	16	3	9	12	15	8	8	13	18	20	13	29	30	13	19	17	12	11	2	24	12	6	6	19	19	20	12	3	37	11	18	19	27	21	4	7	6	12	16	28	27	32	1	43	36
			2	88-G50-12	17	3	1	16	9	16	13	10	4	9	8	5	11	1	9	25	6	9	12	26	18	23	25	4	13	5	7	33	32	29	21	11	19	24	19	18	30	25	25	11	11	12	15	41	3
			1	91-G24-14	16	3	9	12	15	8	8	13	18	20	13	29	30	13	19	17	12	11	2	24	12	6	6	19	19	20	12	3	37	11	18	19	27	21	4	7	6	12	5	17	6	17	29	4	20
			2	91-G24-14	10	13	14	5	2	11	10	17	13	17	10	18	8	17	24	22	21	27	22	11	30	19	3	2	4	8	12	3	37	11	18	19	27	21	4	7	6	12	13	17	6	17	29	4	20
			1	95-G175-13	16	3	9	12	15	8	8	13	18	20	13	29	30	13	19	17	12	11	2	24	12	6	6	19	19	20	12	3	37	11	18	19	27	21	4	7	6	12	16	28	27	32	1	44	22
			2	95-G175-13	17	3	1	16	9	16	13	10	4	9	8	5	11	1	9	25	6	9	12	26	18	23	25	4	13	5	7	33	31	6	12	31	8	9	8	1	20	19	25	9	12	26	26	36	36
			1	97-G32-12	21	12	1	7	18	2	21	19	23	19	3	22	35	1	16	6	1	24	25	4	18	22	1	1	1	31	25	21	1	18	2	3	7	4	3	26	12	33	5	17	6	21	1	44	22
			2	97-G32-12	17	3	1	16	9	16	13	5	18	20	13	29	30	13	19	17	12	11	2	24	12	6	6	19	19	20	12	3	39	6	12	31	8	9	8	1	20	19	25	9	12	26	26	36	36
			1	D-10-50	10	13	14	5	2	11	10	17	13	17	10	18	8	17	24	22	21	27	22	11	30	19	3	2	4	8	12	3	37	11	18	19	27	21	4	7	6	12	16	27	11	12	15	41	3
			2	D-10-50	10	13	14	5	2	11	10	17	13	17	10	18	8	16	9	25	6	9	12	26	18	23	25	4	13	5	7	33	32	29	21	11	19	24	19	18	30	25	25	11	11	12	15	41	3
Founder haplotype assignment:
Female founder			1	F_1	17	3	1	16	9	16	13	10	4	9	8	5	11	1	9	25	6	9	12	26	18	23	25	4	13	5	7	33	32	29	21	11	19	24	19	18	30	25	25	11	11	12	15	41	3
			2	F_2	21	12	1	7	18	2	21	19	23	19	3	22	35	1	16	6	1	24	25	4	18	22	1	1	1	31	25	21	1	18	2	3	7	4	3	26	12	33	5	17	6	17	29	4	20
First male founder			1	M1_1	18	7	6	4	3	12	5	4	25	16	15	25	4	27	37	9	14	9	12	29	27	28	2	8	6	1	28	30	20	6	12	31	8	9	8	1	20	19	25	9	12	26	26	36	36
			2	M1_2	10	13	14	5	2	11	10	17	13	17	10	18	8	17	24	22	21	27	22	11	30	19	3	2	4	8	12	3	37	11	18	19	27	21	4	7	6	12	16	28	27	32	1	44	22
Second male founder			1	M2_1	16	3	9	12	15	8	8	13	18	20	13	29	30	13	19	17	12	11	2	24	12	6	6	19	19	20	12	3	37	11	18	19	27	21	4	7	6	12	16	28	27	32	1	45	15
			2	M2_2	16	3	9	12	15	8	8	13	18	20	13	29	31	8	38	17	12	11	2	24	12	6	6	19	19	20	12	3	37	11	18	19	27	21	4	7	6	12	16	28	27	32	1	45	15
[truncated: 44 more columns]

## Sheet: chr5_1Mb
				window:	0	1	2	3	4	5	6	7	8	9	10	11	12	13	14	15	16	17	18	19	20	21	22	23	24	25	26	27	28	29	30	31	32	33	34	35	36	37	38	39	40	41	42	43	44
Female founder			1	D-85-01	3	17	10	5	12	17	22	17	17	7	16	29	11	2	29	24	35	44	5	13	8	5	28	33	30	23	21	2	39	5	22	15	9	13	25	3	3	9	2	3	1	1	21	5	9
			2	D-85-01	9	14	4	15	22	29	9	2	18	33	9	37	34	12	11	32	25	4	3	8	26	24	15	40	34	16	29	7	3	33	31	23	28	7	8	30	28	4	16	14	12	22	24	6	27
1983-1993	First male founder	F1 offspring	1	D-84-03	12	8	10	5	9	29	9	2	16	24	24	9	32	42	33	18	22	27	16	3	7	8	37	22	24	20	22	41	7	9	16	5	6	28	18	28	11	14	24	19	17	9	29	13	7
			2	D-84-03	3	17	10	5	12	17	22	17	17	7	16	29	11	2	29	24	35	44	5	13	8	5	28	33	30	23	21	2	39	5	22	15	9	13	25	3	3	9	2	3	1	1	21	5	9
			1	D-85-02	1	1	1	1	2	1	2	8	2	3	21	19	3	42	33	18	22	27	16	3	7	8	37	22	24	20	22	41	7	9	16	5	6	28	18	28	11	14	24	19	17	9	29	13	7
			2	D-85-02	3	17	10	5	12	17	22	17	17	7	16	29	11	2	29	24	35	44	5	13	8	5	28	33	30	23	21	2	39	5	22	15	9	13	25	3	3	9	2	3	1	1	21	5	9
			1	3-D-86-01	1	1	1	1	2	1	2	8	2	3	21	19	4	19	9	12	20	12	25	31	3	7	23	7	7	10	8	21	35	28	30	22	18	8	20	11	21	35	22	25	14	11	15	7	16
			2	3-D-86-01	3	17	10	5	12	17	22	17	17	7	16	29	11	2	29	24	35	44	5	13	8	5	28	33	30	23	21	2	39	5	22	15	9	13	25	3	3	9	2	3	1	1	21	5	9
		F2 offspring	1	4-D-89-01	9	14	4	15	22	29	9	2	18	33	8	29	11	2	29	24	35	44	5	13	8	5	28	33	30	23	21	2	39	5	22	15	9	13	25	3	3	9	2	3	1	1	21	5	9
			2	4-D-89-01	3	17	10	5	12	17	22	17	17	7	16	29	11	2	29	24	35	44	5	13	8	5	28	33	30	23	21	2	39	5	22	15	9	13	25	3	3	9	2	3	1	1	21	5	9
			1	5-D-91-01	12	8	10	5	9	29	9	2	16	24	24	9	32	42	33	18	22	27	16	3	7	8	37	22	24	20	22	41	7	9	16	5	6	28	18	28	11	14	24	19	17	9	29	13	7
			2	5-D-91-01	9	14	4	15	22	29	9	2	18	33	8	29	11	2	29	24	35	44	5	13	8	5	28	33	30	23	21	2	39	5	22	15	9	13	25	3	3	9	2	3	1	1	21	5	9
			1	16-D-89-03	3	17	10	5	12	17	22	17	17	7	16	29	11	2	29	24	35	44	5	13	8	5	28	33	30	23	21	2	39	5	22	15	9	13	26	28	11	14	24	19	17	9	29	13	7
			2	16-D-89-03	3	17	10	5	12	17	22	17	17	7	16	29	11	2	29	24	35	44	5	13	8	5	28	33	30	23	21	2	39	5	22	15	9	13	25	3	3	9	2	3	1	1	21	5	9
			1	17-D-92-05	12	8	10	5	9	29	9	2	16	24	24	9	32	42	33	18	22	26	5	13	8	5	28	33	30	23	21	2	39	5	22	15	9	13	25	3	3	9	2	3	1	1	21	5	9
			2	17-D-92-05	3	17	10	5	12	17	22	17	17	7	16	29	11	2	29	24	35	44	5	13	8	5	28	33	30	23	21	2	39	5	22	15	9	13	25	3	3	9	2	3	1	1	21	5	9
			1	30-D-93-02	12	8	10	5	9	29	9	2	16	24	24	9	32	42	33	18	22	27	16	3	7	8	37	22	24	20	22	41	7	9	16	5	6	28	18	28	11	14	24	19	17	9	29	13	7
			2	30-D-93-02	3	17	10	5	12	17	22	17	17	7	16	29	11	2	29	24	35	44	5	13	8	5	28	33	30	23	21	2	39	5	22	15	8	8	20	11	21	35	22	25	14	11	15	7	16
		F3 offspring	1	6-M-98-02	12	8	10	5	9	29	9	2	16	24	24	9	32	42	33	18	22	27	16	3	7	8	37	22	24	20	22	41	7	9	16	5	6	28	18	28	10	9	2	3	1	1	21	5	9
			2	6-M-98-02	3	17	10	5	12	17	22	17	17	7	16	29	11	2	29	24	35	44	5	13	8	5	28	33	30	23	21	2	39	5	22	15	9	13	25	3	3	9	2	3	1	1	21	5	9
			1	31-D-93-03	3	17	10	5	12	17	22	17	17	7	16	29	11	2	29	24	35	44	5	13	8	5	28	33	30	23	21	2	39	5	22	15	9	13	25	3	3	9	2	3	1	1	21	5	9
			2	31-D-93-03	3	17	10	5	12	17	22	17	17	7	16	29	11	2	29	24	35	44	5	13	8	5	28	33	30	23	21	2	39	5	22	15	9	13	25	3	3	9	2	3	1	1	21	5	9
			1	19-D-94-01	3	17	10	5	12	17	22	17	17	7	16	29	11	2	29	24	35	44	5	13	8	5	28	33	30	23	21	2	39	5	22	15	9	13	25	3	3	9	2	3	1	1	21	5	9
			2	19-D-94-01	3	17	10	5	12	17	22	17	17	7	16	29	11	2	29	24	35	44	5	13	8	5	28	33	30	23	21	2	39	5	22	15	9	13	25	3	3	9	2	3	1	1	21	5	9
			1	57-D-92-06	3	17	10	5	12	17	22	17	17	7	16	29	11	2	29	24	35	44	5	13	8	5	28	33	30	23	21	2	39	5	22	15	9	13	25	3	3	9	2	3	1	1	21	5	9
			2	57-D-92-06	12	8	10	5	9	29	8	17	17	7	16	29	11	2	29	24	35	44	5	13	8	5	28	33	30	23	21	2	39	5	22	15	9	13	25	3	3	9	2	3	1	1	21	5	9
	Second male founder	F1 offspring	1	94-D-92-01	1	1	1	1	2	1	2	8	2	3	21	19	4	19	9	12	20	12	25	31	3	7	23	7	7	8	29	7	3	33	31	23	26	13	25	3	3	9	2	3	1	1	21	5	9
			2	94-D-92-01	12	8	10	5	9	29	9	8	13	21	3	13	13	26	30	26	5	15	45	21	10	24	18	32	3	24	24	4	24	14	10	20	17	19	24	26	6	1	17	20	3	13	7	12	20
			1	59-D-96-01	9	14	4	15	22	29	9	2	18	33	9	37	34	12	11	32	25	4	3	8	26	24	15	40	34	16	29	7	3	33	31	23	26	13	25	3	3	9	2	3	1	1	21	5	9
			2	59-D-96-01	11	5	18	21	23	22	24	8	13	21	3	13	12	46	9	12	20	21	6	34	44	12	43	7	26	37	15	32	20	12	7	24	25	3	27	15	22	22	27	17	26	17	14	9	4
			1	43-D-92-02	9	14	4	15	22	29	9	2	18	33	9	37	34	12	11	32	25	4	3	8	26	24	15	40	34	16	29	7	3	33	31	23	26	13	25	3	3	9	2	3	1	1	21	5	9
			2	43-D-92-02	11	5	18	21	23	22	24	8	13	21	3	13	13	26	30	26	5	15	45	21	10	24	18	32	3	24	24	4	24	14	10	20	17	19	24	26	6	1	17	20	3	13	7	12	20
			1	D-93-01	1	1	1	1	2	1	2	8	2	3	21	19	4	19	9	12	20	12	25	31	3	7	23	7	7	10	8	21	35	28	30	22	18	8	20	11	21	34	2	3	1	1	21	5	9
			2	D-93-01	12	8	10	5	9	29	9	2	16	24	23	34	32	43	30	26	5	15	45	21	10	24	18	32	3	24	24	4	24	14	10	20	17	19	24	26	6	1	17	20	3	13	7	12	20
			1	8492	9	14	4	15	22	29	9	2	16	24	23	34	32	46	9	12	20	21	6	34	44	12	43	7	26	37	15	32	20	12	7	24	25	3	27	15	22	22	27	17	26	17	14	9	4
			2	8492	12	8	10	5	9	29	9	2	18	33	9	37	34	11	9	12	20	12	25	31	3	7	23	7	7	10	8	21	35	28	30	22	18	8	20	11	21	35	22	25	14	11	15	7	16
			1	22-D-99-02	9	14	4	15	22	29	9	2	16	24	23	34	32	46	9	12	20	21	6	34	44	12	43	7	26	37	15	32	19	14	10	20	17	19	24	26	6	1	17	20	3	13	7	12	20
			2	22-D-99-02	12	8	10	5	9	29	9	2	18	33	9	37	34	12	11	32	25	4	3	8	26	24	15	40	34	16	29	7	3	33	31	23	26	13	25	3	3	9	2	3	1	1	21	5	9
			1	11-M-98-03	12	8	10	5	9	29	9	2	16	24	23	34	32	46	9	12	20	21	6	34	44	12	43	7	26	37	15	32	20	12	7	24	25	3	27	15	22	22	27	17	26	17	14	9	4
			2	11-M-98-03	1	1	1	1	2	1	2	8	2	3	21	19	4	19	9	12	20	12	25	31	3	7	23	7	7	10	8	21	35	28	30	22	18	8	20	11	21	35	22	25	14	11	15	7	16
1994-2005			1	Varg0109	12	8	10	5	9	29	9	2	16	24	23	34	32	46	9	12	20	21	6	34	44	12	43	7	26	37	15	32	20	12	7	24	25	3	27	15	22	22	27	17	26	17	14	9	4
			2	Varg0109	12	8	10	5	9	29	9	2	16	24	24	9	32	42	33	18	22	27	16	3	7	8	37	22	24	20	22	41	7	9	16	5	6	28	18	28	10	9	2	3	1	1	21	5	9
			1	105-D-00-15	12	8	10	5	9	29	9	2	16	24	24	9	32	42	33	18	22	27	16	3	7	8	37	22	24	20	22	41	7	9	16	5	6	28	18	28	11	14	24	19	17	9	29	13	7
			2	105-D-00-15	11	5	18	21	23	22	24	8	13	21	3	13	13	26	30	26	5	15	43	8	26	24	15	40	34	16	29	7	3	33	31	23	26	13	25	3	3	9	2	3	1	1	21	5	9
			1	12-M-01-04	12	8	10	5	9	29	9	2	16	24	23	34	32	46	9	12	20	21	6	34	44	12	43	7	26	37	15	32	20	12	7	24	25	3	27	15	22	22	27	17	26	17	14	9	4
			2	12-M-01-04	12	8	10	5	9	29	9	2	16	24	24	9	32	42	33	18	22	27	16	3	3	8	37	22	24	20	22	41	7	9	16	5	6	28	18	28	10	9	2	3	1	1	21	5	9
			1	14-M-00-09	12	8	10	5	9	29	9	2	16	24	24	9	32	42	33	18	22	27	16	3	7	8	37	22	24	20	22	41	7	9	16	5	6	28	18	28	10	9	2	3	1	1	21	5	9
			2	14-M-00-09	11	5	18	21	23	22	24	8	13	21	3	13	13	26	30	26	5	15	44	8	26	24	15	40	34	16	29	7	3	33	31	23	26	13	25	3	3	9	2	3	1	1	21	5	9
			1	15-M-01-10	12	8	10	5	9	29	9	2	16	24	24	9	32	42	33	18	22	27	16	3	7	8	37	22	24	20	22	41	7	9	16	5	6	28	18	28	10	9	2	3	1	1	21	5	9
			2	15-M-01-10	11	5	18	21	23	22	24	8	13	21	3	13	13	26	30	26	5	15	43	8	26	24	15	40	34	16	29	7	3	33	31	23	26	13	25	3	3	9	2	3	1	1	21	5	9
			1	28-M-03-07	1	1	1	1	2	1	2	8	2	3	21	19	4	19	9	12	20	12	25	31	3	7	23	7	7	10	8	21	35	28	30	22	18	8	20	11	21	35	22	25	13	17	14	9	4
			2	28-M-03-07	11	5	18	21	23	22	24	8	13	21	3	13	13	26	30	26	5	15	43	8	26	24	15	40	34	16	29	7	3	33	31	23	26	13	25	3	3	9	2	3	1	1	21	5	9
			1	75-G9-05	12	8	10	5	9	29	9	2	16	24	23	34	32	46	9	12	20	21	6	34	44	12	43	7	26	37	15	32	20	12	7	25	17	19	24	26	6	1	17	20	3	13	7	12	20
			2	75-G9-05	1	1	1	1	2	1	2	8	2	3	21	19	4	19	9	12	20	12	25	31	3	7	23	7	7	10	8	21	35	28	30	22	18	8	20	11	21	35	22	25	14	11	15	7	16
			1	D-01-18	12	8	10	5	9	29	9	2	16	24	24	9	32	42	33	18	22	27	16	3	7	8	37	22	24	20	22	41	7	9	16	5	6	28	18	28	11	14	24	19	17	9	29	13	7
			2	D-01-18	11	5	18	21	23	22	24	8	13	21	3	13	13	26	30	26	5	15	45	21	10	24	18	32	3	24	24	4	24	14	10	20	17	19	24	24	22	22	27	16	1	1	21	5	9
			1	110-M-01-06	12	8	10	5	9	29	9	2	16	24	23	34	32	46	9	12	20	21	6	34	44	12	43	7	26	37	15	35	7	9	16	5	6	28	18	28	10	9	2	3	1	1	21	5	9
			2	110-M-01-06	1	1	1	1	2	1	2	8	2	3	21	19	4	19	9	12	20	12	25	31	3	7	23	7	7	10	8	21	35	27	7	24	25	3	27	15	22	22	27	17	26	17	14	9	4
			1	13-M-98-08	1	1	1	1	2	1	2	8	2	3	21	19	4	19	9	12	20	12	25	31	3	7	23	7	26	37	15	32	20	12	19	24	25	3	27	15	22	22	27	17	26	17	14	9	4
			2	13-M-98-08	3	17	10	5	12	17	22	17	17	7	16	29	11	2	29	24	35	44	5	13	8	5	28	33	30	23	21	2	39	5	22	15	9	13	25	3	3	9	2	3	1	1	21	5	9
			1	25-M-03-06	9	14	4	15	22	29	9	2	18	33	9	37	34	12	11	32	25	4	3	8	26	24	15	40	34	16	28	21	35	28	30	22	18	8	20	11	21	35	22	25	16	17	14	9	4
			2	25-M-03-06	1	1	1	1	2	1	2	8	2	3	21	19	4	19	9	12	20	12	25	31	3	7	23	7	7	10	8	21	35	28	30	22	18	8	20	11	21	35	22	25	13	17	14	9	4
			1	35-D-05-23	12	8	10	5	9	29	9	2	16	24	24	9	32	42	33	18	22	27	16	3	7	8	37	22	24	20	22	41	7	9	16	5	6	28	18	28	10	9	2	3	1	1	21	5	9
			2	35-D-05-23	11	5	18	21	23	22	24	8	13	21	3	13	13	26	30	26	5	15	42	3	7	7	23	7	7	10	8	21	35	28	30	22	18	8	20	11	21	35	22	25	14	11	15	7	16
			1	38-D-06-16	12	8	10	5	9	29	9	2	16	24	24	9	32	42	33	18	22	27	16	3	7	8	37	22	24	20	22	41	7	9	16	5	6	28	18	28	10	9	2	3	1	1	21	5	9
			2	38-D-06-16	1	1	1	1	2	1	2	8	2	3	21	19	4	19	9	11	22	27	16	3	7	8	37	22	24	20	22	41	7	9	16	5	6	28	18	28	10	9	2	3	1	1	21	5	9
			1	60-M-00-10	12	8	10	5	9	29	9	2	16	24	24	9	32	42	33	18	22	27	16	3	7	8	37	22	24	20	22	41	7	9	16	5	6	28	18	28	10	9	2	3	1	1	21	5	9
			2	60-M-00-10	11	5	18	21	23	22	24	8	11	24	24	9	32	42	33	18	22	27	16	3	7	8	37	22	24	20	22	41	7	9	16	5	6	28	18	28	11	14	24	19	17	9	29	13	7
			1	D-00-12	3	17	10	5	12	18	9	2	16	24	23	34	32	46	9	12	20	12	25	31	3	7	23	7	7	10	8	21	35	28	30	22	18	8	20	11	21	35	22	25	14	11	15	7	16
			2	D-00-12	12	8	10	5	9	29	9	2	16	24	24	9	32	42	33	18	22	27	16	3	7	8	37	22	24	20	22	41	7	9	16	5	6	28	18	28	11	14	24	19	17	9	29	13	7
			1	M-98-01	12	8	10	5	9	29	9	2	16	24	23	34	32	46	9	12	20	12	25	31	3	7	23	7	7	10	8	21	35	28	30	22	18	8	20	11	21	35	22	25	14	11	15	7	16
			2	M-98-01	3	17	10	5	12	17	22	17	17	7	15	9	32	42	33	18	22	27	16	3	7	8	37	22	24	20	22	41	7	9	16	5	6	28	18	28	11	14	24	19	17	9	29	13	7
			1	V009511	9	14	4	15	22	29	9	2	16	24	24	9	32	42	33	18	22	27	16	3	7	8	37	22	24	20	22	41	7	9	16	5	6	28	18	28	11	14	24	19	17	9	29	13	7
			2	V009511	12	8	10	5	9	29	9	2	18	33	9	37	34	12	11	32	25	4	3	8	26	24	15	40	34	16	28	21	35	28	30	22	18	8	20	11	21	35	22	25	14	11	15	7	16
			1	106-D-10-20	12	8	10	5	9	29	9	2	16	24	23	34	32	46	8	32	25	4	3	8	26	24	15	40	34	16	28	21	35	28	30	22	18	8	20	11	21	35	22	25	14	11	15	7	16
			2	106-D-10-20	12	8	10	5	9	29	9	2	16	24	24	9	32	42	33	18	22	27	16	3	7	8	37	22	24	20	22	41	7	9	16	5	6	28	18	28	11	13	22	25	13	17	14	9	4
			1	109-D-10-30	12	8	10	5	9	29	9	2	15	3	21	19	4	19	9	12	20	12	25	31	3	7	23	7	7	10	8	20	20	12	7	24	25	3	27	15	22	22	27	17	26	17	14	9	4
			2	109-D-10-30	12	8	10	5	9	29	9	2	16	24	24	9	32	42	33	18	22	27	16	3	7	8	37	22	24	20	22	41	7	9	16	5	6	28	18	28	10	9	2	3	1	1	21	5	9
			1	36-D-06-14	11	5	18	21	23	22	24	8	13	21	3	13	13	26	30	26	5	15	45	21	10	24	18	32	3	24	24	4	24	14	10	20	17	19	24	24	22	22	27	17	26	17	14	9	4
			2	36-D-06-14	3	17	10	5	12	17	22	17	17	7	16	29	11	2	29	24	35	44	5	13	8	5	28	33	30	23	21	2	39	5	22	15	9	13	25	3	3	9	2	3	1	1	21	5	9
			1	37-M-06-03	12	8	10	5	9	29	9	2	16	24	24	9	32	42	33	18	22	27	16	3	7	8	37	22	24	20	22	41	7	9	16	5	6	28	18	28	10	9	2	3	1	1	21	5	9
			2	37-M-06-03	11	5	18	21	23	22	24	8	13	21	3	13	13	26	30	26	5	15	45	21	10	24	18	32	3	24	24	4	24	14	10	20	17	18	18	28	10	9	2	3	1	1	21	5	9
			1	39-M-06-04	12	8	10	5	9	29	9	2	16	24	24	9	32	42	33	18	22	27	16	3	7	8	37	22	24	20	22	41	7	9	16	5	6	28	18	28	10	9	2	3	1	1	21	5	9
			2	39-M-06-04	3	17	10	5	12	17	22	17	17	7	16	29	11	2	29	24	35	44	5	13	8	5	28	33	30	23	21	2	39	5	22	15	9	13	25	3	3	9	2	3	1	1	21	5	9
			1	40-D-07-28	12	8	10	5	9	29	9	2	16	24	24	9	32	42	33	18	22	27	16	3	7	8	37	22	24	20	22	41	7	9	16	5	6	28	18	28	10	9	2	3	1	1	21	5	9
			2	40-D-07-28	1	1	1	1	2	1	2	8	2	3	21	19	4	19	9	12	20	12	25	31	3	7	23	7	7	10	8	21	35	27	7	24	25	3	27	15	22	22	27	17	26	17	14	9	4
			1	55-D-08-10	12	8	10	5	9	29	9	2	16	24	24	9	32	42	33	18	22	27	16	3	7	8	37	22	24	20	22	41	7	9	16	5	6	28	18	28	10	9	2	3	1	1	21	5	9
			2	55-D-08-10	1	1	1	1	2	1	2	8	2	3	21	19	4	19	9	12	20	12	25	31	3	7	23	22	24	20	22	41	7	9	16	5	6	28	18	28	10	9	2	3	1	1	21	5	9
			1	80-M-09-17	12	8	10	5	9	29	9	2	16	26	21	19	4	19	9	12	20	12	25	31	3	7	23	7	7	10	8	21	35	28	30	22	18	8	20	11	21	35	22	25	13	17	14	9	4
			2	80-M-09-17	9	14	4	15	22	29	9	2	18	33	9	37	34	12	11	32	25	4	3	8	26	24	15	40	34	16	28	21	35	28	30	22	18	8	20	11	21	35	22	25	14	11	15	7	16
			1	D-08-20	12	8	10	5	9	29	9	2	16	24	24	9	32	42	33	18	22	27	16	3	7	8	37	22	25	37	15	32	20	12	7	24	25	3	27	15	22	22	27	17	26	17	14	9	4
			2	D-08-20	11	5	18	21	23	22	24	8	13	21	3	13	13	26	30	26	5	15	45	21	10	24	18	32	3	24	24	4	24	14	10	20	17	19	24	24	22	22	27	17	26	17	14	9	4
			1	M-05-07	12	8	10	5	9	29	9	2	16	24	24	9	32	42	33	18	22	27	16	3	7	8	37	22	24	20	22	41	7	9	16	5	6	28	18	28	10	9	2	3	1	1	21	5	9
			2	M-05-07	11	5	18	21	23	22	24	8	13	21	3	13	13	26	30	26	5	15	45	21	10	24	18	32	3	24	24	4	24	14	10	20	17	18	18	28	10	9	2	3	1	1	21	5	9
			1	81-M-09-05	3	17	10	5	12	18	9	2	16	24	24	9	32	42	33	18	22	27	16	3	7	8	37	22	24	20	22	41	7	9	16	5	6	28	18	28	11	14	24	19	17	9	29	13	7
			2	81-M-09-05	1	1	1	1	2	1	2	8	1	3	21	19	4	19	9	12	20	12	25	31	3	7	23	7	7	10	8	21	35	28	30	22	18	8	20	11	21	35	22	25	14	11	15	7	16
2006-2014			1	103-D-11-17	12	8	10	5	9	29	9	2	16	24	24	9	32	42	33	18	22	27	16	3	7	8	37	22	25	37	15	32	20	12	7	24	25	3	27	15	22	22	27	17	26	17	14	9	4
			2	103-D-11-17	11	5	18	21	23	22	24	8	13	21	3	13	13	26	30	26	5	15	45	21	10	24	18	32	3	24	24	4	24	14	10	20	17	19	24	24	22	22	27	17	26	17	14	9	4
			1	112-D-10-29	12	8	10	5	9	29	9	2	16	24	23	34	32	46	8	32	25	4	3	8	26	24	15	40	34	16	28	21	35	28	30	22	18	8	20	11	21	35	22	25	14	11	15	7	16
			2	112-D-10-29	12	8	10	5	9	29	9	2	16	24	23	34	32	46	9	12	20	12	25	31	3	7	23	7	7	10	8	21	35	28	30	22	18	8	20	11	21	35	22	25	14	11	15	7	16
			1	45-D-07-24	12	8	10	5	9	29	9	2	16	24	23	34	32	46	9	12	20	21	6	35	3	7	23	7	7	10	8	21	35	28	30	22	18	8	20	11	21	35	22	25	14	11	15	7	16
			2	45-D-07-24	11	5	18	21	23	22	24	8	13	21	3	13	13	26	30	26	5	15	45	21	10	24	18	32	3	24	24	10	7	9	16	5	6	30	27	15	22	22	27	17	26	17	14	9	4
			1	48-D-08-21	9	14	4	15	22	29	9	2	18	33	9	37	34	12	11	32	25	4	3	8	26	24	15	40	34	16	28	21	35	28	30	22	18	8	20	11	21	35	22	25	14	11	15	7	16
			2	48-D-08-21	1	1	1	1	2	1	2	8	2	3	21	19	4	19	9	12	20	12	25	31	3	7	23	7	7	12	22	41	7	9	16	5	6	28	18	28	11	14	24	19	17	9	29	13	7
			1	51-D-07-09	12	8	10	5	9	29	9	2	16	24	24	9	32	42	33	18	22	27	16	3	7	8	37	22	24	20	22	41	7	9	16	5	6	28	18	26	6	1	17	20	3	13	7	12	20
			2	51-D-07-09	1	1	1	1	2	1	2	8	3	24	23	34	32	46	9	12	20	21	6	34	44	12	43	7	25	37	15	32	20	12	7	24	25	3	27	15	22	22	27	17	26	17	14	9	4
			1	52-D-07-17	3	17	10	5	12	18	9	2	16	24	24	9	32	42	33	18	22	27	16	3	7	8	37	22	24	20	22	41	7	9	16	5	6	28	18	28	10	9	2	3	1	1	21	5	9
			2	52-D-07-17	12	8	10	5	9	29	9	2	16	24	24	9	32	42	33	18	22	27	16	3	7	8	37	22	25	37	15	32	20	12	7	24	25	3	27	15	22	22	27	17	26	17	14	9	4
			1	53-D-08-08	3	17	10	5	12	18	9	2	16	24	24	9	32	42	33	18	22	27	16	3	7	8	37	22	24	20	22	41	7	9	16	5	6	28	18	28	10	9	2	3	1	1	21	5	9
			2	53-D-08-08	12	8	10	5	9	29	9	2	16	24	24	9	32	42	33	18	22	27	16	3	7	8	37	22	25	37	15	32	20	12	7	24	25	3	27	26	6	1	17	20	3	13	7	12	20
			1	54-M-07-06	12	8	10	5	9	29	9	2	16	24	23	34	32	46	9	12	20	21	6	34	44	12	43	7	26	37	15	32	20	12	7	24	25	3	27	15	22	22	27	17	26	17	14	9	4
			2	54-M-07-06	12	8	10	5	9	29	9	2	16	24	24	9	32	42	33	18	22	27	16	3	7	8	37	22	24	20	22	41	7	9	16	5	6	28	18	28	10	9	2	3	1	1	21	5	9
			1	56-D-07-16	12	8	10	5	9	29	9	2	16	24	24	9	32	42	33	18	22	27	16	3	7	8	37	22	24	20	22	41	7	9	16	5	6	28	18	28	10	9	2	3	1	1	21	5	9
			2	56-D-07-16	1	1	1	1	2	1	2	8	2	3	21	19	4	19	9	11	22	27	16	3	7	8	37	22	24	20	22	41	7	9	16	5	6	28	18	28	10	9	2	3	1	1	21	5	9
			1	D-08-19	11	5	18	21	23	22	24	8	13	21	3	13	13	26	30	26	5	15	43	8	26	23	28	33	30	23	21	2	39	5	22	15	9	13	25	3	3	9	2	3	1	1	21	5	9
			2	D-08-19	3	17	10	5	12	17	22	17	17	7	16	29	11	2	29	24	35	44	5	13	8	8	37	22	24	20	22	41	7	9	16	5	6	28	18	28	10	1	17	20	3	13	7	12	20
			1	102-G34-10	1	1	1	1	2	1	2	8	2	3	21	19	4	19	9	12	20	12	25	31	3	7	23	7	7	10	8	21	35	28	30	22	18	8	20	11	21	35	22	25	13	17	14	9	4
			2	102-G34-10	1	1	1	1	2	1	2	8	2	3	21	19	4	19	9	12	20	12	25	31	6	24	15	40	34	16	29	7	3	33	31	23	26	13	25	3	3	9	2	3	1	1	21	5	9
			1	111-G110-11	12	8	10	5	9	29	9	2	16	24	23	34	32	46	9	12	20	21	6	34	44	12	43	7	26	37	15	32	20	12	7	25	17	19	24	26	6	1	17	20	3	13	7	12	20
			2	111-G110-11	12	8	10	5	9	29	9	2	16	24	23	34	32	46	9	14	25	4	2	3	7	8	37	22	24	20	22	41	7	9	16	5	6	28	18	28	11	13	22	25	13	17	14	9	4
			1	61-G97-13	9	14	4	15	22	29	9	2	18	33	9	37	34	12	11	32	25	4	3	8	26	24	15	40	34	16	28	21	35	28	30	22	18	8	20	11	21	35	22	25	14	11	15	7	16
			2	61-G97-13	11	5	18	21	23	22	24	8	13	21	3	13	13	26	30	26	5	15	45	21	10	24	18	32	3	24	24	4	24	14	10	20	17	19	24	24	22	23	2	3	1	1	21	5	9
			1	62-G174-13	9	14	4	15	22	29	9	2	18	33	9	37	34	12	11	32	25	4	3	8	26	24	15	40	34	16	28	21	35	28	30	22	18	8	20	11	21	33	2	3	1	1	21	5	9
			2	62-G174-13	11	5	18	21	23	22	24	8	13	21	3	13	13	26	30	26	5	15	45	21	10	24	18	32	3	24	24	4	24	14	10	20	17	19	24	24	22	22	27	17	26	17	14	9	4
			1	68-D-10-68	12	8	10	5	9	29	9	2	16	24	24	9	32	42	33	18	22	27	16	3	3	8	37	22	24	20	22	41	7	9	16	5	7	28	18	29	22	22	27	17	26	17	14	9	4
			2	68-D-10-68	12	8	10	5	9	29	9	2	16	24	24	9	33	26	30	26	5	15	45	21	10	24	18	32	3	24	24	4	24	14	10	20	17	19	24	24	22	22	27	17	26	17	14	9	4
			1	69-D-10-15	12	8	10	5	9	29	9	2	16	24	24	9	32	42	33	18	22	27	43	8	26	24	15	40	34	16	29	7	3	33	31	23	26	13	25	3	3	9	1	17	26	17	14	9	4
			2	69-D-10-15	1	1	1	1	2	1	2	8	3	24	24	9	32	42	33	18	22	27	27	8	26	24	15	40	34	16	29	7	3	33	31	23	26	13	25	3	3	9	2	3	1	1	21	5	9
			1	108-D-10-44	12	8	10	5	9	29	9	2	16	24	24	9	32	42	33	18	22	27	27	8	26	24	15	40	34	16	29	7	3	33	31	23	26	13	25	3	3	9	2	3	1	1	21	5	9
			2	108-D-10-44	1	1	1	1	2	1	2	8	3	24	24	9	32	42	33	18	22	27	27	8	26	24	15	40	34	16	29	7	3	33	31	23	26	13	25	3	3	9	2	3	1	1	21	5	9
			1	70-D-10-23	12	8	10	5	9	29	9	2	16	24	24	9	32	42	33	18	22	27	27	8	26	24	15	40	34	16	29	7	3	33	31	23	26	13	25	3	3	9	2	3	1	1	21	5	9
			2	70-D-10-23	1	1	1	1	2	1	2	8	3	24	24	9	32	42	33	18	22	27	27	8	26	24	15	40	34	16	29	7	3	33	31	23	26	13	25	3	3	9	2	3	1	1	21	5	9
			1	92-G58-15	12	8	10	5	9	29	9	2	16	24	23	34	32	46	9	12	20	21	6	34	44	12	43	7	26	37	15	32	20	12	7	24	25	3	27	15	22	22	27	17	26	17	14	10	3
			2	92-G58-15	12	8	10	5	9	29	9	2	16	24	23	34	32	46	9	12	20	21	6	32	3	8	37	22	24	20	22	41	7	9	16	5	6	28	18	28	11	14	24	19	17	9	29	14	7
			1	73-D-11-22	12	8	10	5	9	29	9	2	16	24	23	34	32	46	9	12	20	21	6	34	44	12	43	7	26	37	15	32	20	12	7	24	25	3	27	15	22	22	27	17	26	17	14	9	4
			2	73-D-11-22	11	5	18	21	23	22	24	8	13	33	9	37	34	12	11	32	25	4	3	8	26	24	15	40	34	16	28	21	35	28	30	22	18	8	20	11	21	35	22	25	14	11	15	7	16
			1	77-G87-12	12	8	10	5	9	29	9	2	16	24	24	9	32	42	33	18	22	25	16	3	7	8	37	22	24	20	22	41	7	9	16	5	6	28	18	28	10	9	2	3	1	1	21	5	9
			2	77-G87-12	1	1	1	1	2	1	2	8	2	3	21	19	4	19	9	12	20	12	25	31	3	7	23	7	7	10	8	21	35	28	30	22	18	8	20	11	21	35	22	25	14	11	15	7	16
			1	78-D-11-58	1	1	1	1	2	1	2	8	2	3	21	19	4	19	9	12	20	12	25	31	3	7	23	7	7	10	8	21	35	28	30	22	18	8	20	11	21	35	22	25	14	11	15	7	16
			2	78-D-11-58	1	1	1	1	2	1	2	8	2	3	21	19	13	19	9	12	20	12	25	31	3	7	23	7	7	10	8	20	20	12	7	24	25	3	27	15	22	22	27	17	26	17	14	9	4
			1	86-G126-13	12	8	10	5	9	29	9	2	16	24	23	34	32	46	9	12	20	21	6	34	44	12	43	7	26	37	15	32	7	9	16	5	6	28	18	28	10	9	2	3	1	1	21	5	9
			2	86-G126-13	12	8	10	5	9	29	9	2	16	24	24	9	32	42	33	18	22	27	16	3	7	8	39	32	3	24	24	4	32	12	7	24	25	3	27	15	22	22	27	17	26	17	14	9	4
			1	88-G50-12	3	17	10	5	12	18	9	2	16	24	24	9	32	42	33	18	22	27	16	3	7	8	37	22	24	20	22	41	7	13	30	22	18	8	20	11	21	35	22	25	14	11	15	7	16
			2	88-G50-12	9	14	4	15	22	29	9	2	18	33	9	37	34	12	11	32	25	4	3	8	26	24	15	40	34	16	29	21	35	28	30	22	18	8	20	11	21	35	22	25	14	11	15	7	16
			1	91-G24-14	12	8	10	5	9	29	9	2	16	31	24	9	32	42	33	18	22	24	45	21	10	24	18	32	3	24	24	4	24	14	10	20	17	29	20	11	21	35	22	25	14	11	15	7	16
			2	91-G24-14	11	5	18	21	23	22	24	8	13	10	3	13	13	26	30	26	5	4	3	8	26	24	15	40	34	16	27	21	35	28	30	22	18	36	24	24	22	22	27	17	26	17	14	9	4
			1	95-G175-13	3	17	10	5	12	18	9	2	16	24	24	9	32	42	33	18	22	27	16	3	7	8	37	22	24	20	22	41	7	9	16	5	6	28	18	28	11	14	24	19	17	9	29	13	7
			2	95-G175-13	1	1	1	1	2	1	2	8	2	3	21	19	4	19	9	12	20	12	25	31	3	7	23	7	7	10	8	21	35	28	30	22	18	8	20	11	21	35	22	25	13	17	14	9	4
			1	97-G32-12	9	14	4	15	22	29	9	2	16	24	23	34	32	46	9	12	20	21	6	34	44	12	43	7	26	37	15	32	20	12	7	24	25	3	27	15	22	22	27	17	26	17	14	9	4
			2	97-G32-12	11	5	18	21	23	23	9	2	18	33	9	37	34	12	11	32	25	4	3	8	26	24	15	40	34	16	28	21	35	28	30	22	18	8	20	11	21	35	22	25	14	11	15	7	16
			1	D-10-50	12	8	10	5	9	29	9	2	16	24	24	9	32	42	33	18	22	27	16	3	7	8	37	22	24	20	22	41	7	8	10	20	17	19	24	24	22	22	27	17	26	17	14	9	4
			2	D-10-50	12	8	10	5	9	26	2	8	2	3	21	19	4	19	9	12	20	12	25	31	3	7	23	7	7	10	8	21	35	28	30	22	18	8	20	11	21	35	22	25	14	11	15	7	16
Founder haplotype assignment:
Female founder			1	F_1	3	17	10	5	12	17	22	17	17	7	16	29	11	2	29	24	35	44	5	13	8	5	28	33	30	23	21	2	39	5	22	15	9	13	25	3	3	9	2	3	1	1	21	5	9
			2	F_2	9	14	4	15	22	29	9	2	18	33	9	37	34	12	11	32	25	4	3	8	26	24	15	40	34	16	29	7	3	33	31	23	28	7	8	30	28	4	16	14	12	22	24	6	27
First male founder			1	M1_1	12	8	10	5	9	29	9	2	16	24	24	9	32	42	33	18	22	27	16	3	7	8	37	22	24	20	22	41	7	9	16	5	6	28	18	28	11	14	24	19	17	9	29	13	7
			2	M1_2	1	1	1	1	2	1	2	8	2	3	21	19	4	19	9	12	20	12	25	31	3	7	23	7	7	10	8	21	35	28	30	22	18	8	20	11	21	35	22	25	14	11	15	7	16
Second male founder			1	M2_1	11	5	18	21	23	22	24	8	13	21	3	13	13	26	30	26	5	15	45	21	10	24	18	32	3	24	24	4	24	14	10	20	17	19	24	26	6	1	17	20	3	13	7	12	20
			2	M2_2	12	8	10	5	9	29	9	2	16	24	23	34	32	46	9	12	20	21	6	34	44	12	43	7	26	37	15	32	20	12	7	24	25	3	27	15	22	22	27	17	26	17	14	9	4
[truncated: 44 more columns]

## Sheet: chr6_1Mb
				window:	0	1	2	3	4	5	6	7	8	9	10	11	12	13	14	15	16	17	18	19	20	21	22	23	24	25	26	27	28	29	30	31	32	33	34	35	36	37	38	39	40	41	42	43	44
Female founder			1	D-85-01	10	14	11	17	12	9	12	23	10	12	37	19	19	13	15	45	45	28	21	25	5	23	1	35	25	7	19	10	23	4	5	29	24	20	20	5	13	5	1	7	26	28	21	25	36
			2	D-85-01	8	5	2	9	6	3	5	15	4	32	3	15	1	3	1	32	3	3	19	17	42	9	15	29	27	29	8	29	22	16	28	23	23	4	27	26	5	13	17	2	13	11	28	21	13
1983-1993	First male founder	F1 offspring	1	D-84-03	8	5	2	9	6	3	5	15	4	32	3	15	1	3	1	32	3	3	19	17	42	9	15	29	27	29	8	29	22	16	28	23	23	4	27	26	5	13	17	2	13	11	28	21	13
			2	D-84-03	9	2	8	13	15	5	18	9	27	20	25	7	20	11	32	8	10	1	23	9	31	12	1	35	25	9	11	35	23	2	23	13	4	33	41	16	4	24	15	11	27	4	21	24	11
			1	D-85-02	10	14	11	17	12	9	12	23	10	12	37	19	19	13	15	45	45	28	21	25	5	23	1	35	25	7	19	10	23	4	5	29	24	20	20	5	13	5	1	7	26	28	21	25	36
			2	D-85-02	9	2	8	13	15	5	18	9	27	20	25	7	20	11	32	8	10	1	23	9	31	12	1	35	25	9	11	35	23	2	23	13	4	33	41	16	4	24	15	11	27	4	21	24	11
			1	3-D-86-01	8	5	2	9	6	3	5	15	4	32	3	15	1	3	1	32	3	3	19	17	42	9	15	29	27	29	8	29	22	16	28	23	23	4	27	26	5	13	17	2	13	11	28	21	13
			2	3-D-86-01	9	2	8	13	15	5	18	9	27	20	25	7	20	11	32	8	10	1	23	9	31	12	1	35	25	9	11	35	23	2	23	13	4	33	41	16	4	24	15	11	27	4	21	24	11
		F2 offspring	1	4-D-89-01	9	2	8	13	15	5	18	9	27	20	25	7	20	11	32	7	27	30	42	2	2	27	4	27	2	13	32	2	16	16	28	23	23	4	27	26	5	13	17	2	13	11	28	21	13
			2	4-D-89-01	13	9	5	4	2	20	16	10	6	23	32	35	12	5	21	2	27	30	42	2	2	27	4	27	2	13	32	2	16	5	20	1	8	29	27	26	5	13	17	14	22	18	1	34	33
			1	5-D-91-01	10	14	11	17	12	9	12	23	10	12	37	19	19	13	15	45	45	28	21	25	5	23	1	35	25	7	19	10	23	4	5	29	24	20	20	5	13	5	1	7	26	28	21	25	36
			2	5-D-91-01	9	2	8	13	15	5	18	9	27	20	25	7	20	11	32	7	27	30	42	2	2	27	4	27	2	13	32	2	16	5	20	1	8	29	27	26	5	13	17	14	22	18	1	34	33
			1	16-D-89-03	8	5	2	9	6	3	5	15	4	32	3	15	1	3	1	32	3	3	19	17	42	9	15	29	27	29	8	29	22	16	28	23	23	4	27	26	5	13	17	2	13	11	28	21	13
			2	16-D-89-03	13	9	5	4	2	20	16	10	6	23	32	35	12	5	21	2	27	30	42	2	2	27	4	27	2	13	32	2	16	5	20	1	8	29	27	26	5	13	17	14	22	18	1	34	33
			1	17-D-92-05	8	5	2	9	6	3	5	15	4	32	3	15	1	3	1	32	3	3	19	17	42	9	15	29	27	29	8	29	22	16	28	23	23	4	26	16	4	24	15	11	27	4	21	24	11
			2	17-D-92-05	13	9	5	4	2	20	16	10	6	23	32	35	12	5	21	2	27	30	42	2	2	27	4	27	2	13	32	2	16	5	20	1	8	29	27	26	5	13	17	14	22	18	1	34	33
			1	30-D-93-02	8	5	2	9	6	3	5	15	4	32	3	15	1	3	1	32	3	3	19	17	42	9	15	29	27	29	8	29	22	16	28	23	23	4	27	26	5	13	17	2	13	11	28	20	36
			2	30-D-93-02	9	2	8	13	15	5	18	9	27	20	25	7	20	11	32	7	27	30	42	2	2	27	4	27	2	13	32	2	16	5	20	1	8	29	27	26	5	13	17	14	22	18	1	34	33
		F3 offspring	1	6-M-98-02	8	5	2	9	6	3	5	15	4	32	3	15	1	3	1	32	3	3	19	17	42	9	15	29	27	29	8	29	22	16	28	23	23	4	26	16	4	24	15	11	27	4	21	24	11
			2	6-M-98-02	8	5	2	9	6	3	5	15	4	32	3	15	1	3	1	32	3	3	19	17	42	8	4	27	2	13	32	2	16	5	20	1	8	29	27	26	5	13	17	14	22	18	1	34	33
			1	31-D-93-03	8	5	2	9	6	3	5	15	4	32	3	15	1	3	1	32	3	3	19	17	42	9	15	29	27	29	8	29	22	16	28	23	23	4	26	16	4	24	15	11	27	4	21	24	11
			2	31-D-93-03	13	9	5	4	2	20	16	10	6	23	32	35	12	5	21	2	27	30	42	2	2	27	4	27	2	13	32	2	16	5	20	1	8	29	27	26	5	13	17	14	22	18	1	34	33
			1	19-D-94-01	8	5	2	9	6	3	5	15	4	32	3	15	1	3	1	32	3	3	19	17	42	8	4	27	2	13	32	2	16	5	20	1	8	29	27	26	5	13	17	14	22	18	1	34	33
			2	19-D-94-01	13	9	5	4	2	20	16	10	6	23	32	35	12	5	21	2	27	30	42	2	2	27	4	27	2	13	32	2	16	5	20	1	8	29	27	26	5	13	17	14	22	18	1	34	33
			1	57-D-92-06	8	5	2	9	6	3	5	15	4	32	3	15	1	3	1	32	3	3	19	17	42	8	4	27	2	13	32	2	16	5	20	1	8	29	27	26	5	13	17	14	22	18	1	34	33
			2	57-D-92-06	13	9	5	4	2	20	16	10	6	23	32	35	12	5	21	2	27	30	42	2	2	27	4	27	2	13	32	2	16	5	20	1	8	29	27	26	5	13	17	14	22	18	1	34	33
	Second male founder	F1 offspring	1	94-D-92-01	9	2	8	13	15	5	18	9	27	20	24	23	21	16	13	34	42	29	2	17	39	10	19	23	4	5	24	5	27	23	21	26	13	18	11	2	12	7	5	19	7	17	13	46	35
			2	94-D-92-01	8	5	2	9	6	3	5	15	4	32	3	15	1	3	1	32	3	3	19	17	42	9	15	29	27	29	8	29	22	16	28	23	23	4	27	26	5	13	17	2	13	11	28	21	13
			1	59-D-96-01	9	2	8	13	15	5	18	9	27	20	24	23	21	16	13	34	42	29	2	17	39	10	19	23	4	5	24	5	27	23	21	26	13	18	11	2	12	7	5	19	7	17	13	46	35
			2	59-D-96-01	9	2	8	13	15	5	18	9	27	20	25	7	20	11	32	8	10	1	23	8	2	27	4	27	2	13	32	2	16	5	20	1	8	29	27	26	5	13	17	14	22	18	1	34	33
			1	43-D-92-02	9	2	8	13	15	5	18	9	27	20	24	23	21	16	13	34	42	29	2	17	39	10	19	23	4	5	24	5	27	23	21	26	13	18	11	2	12	7	5	19	7	17	13	46	35
			2	43-D-92-02	8	5	2	9	6	3	5	15	4	32	3	15	1	3	3	8	10	1	23	8	2	27	4	27	2	13	32	2	16	5	20	1	8	29	27	26	5	13	17	14	22	18	1	34	33
			1	D-93-01	9	2	8	13	15	5	18	9	27	20	24	23	21	16	13	34	42	29	2	17	39	10	19	23	4	5	24	5	27	23	21	26	13	18	11	2	12	7	5	19	7	17	13	46	35
			2	D-93-01	8	5	2	9	6	3	5	15	4	32	3	15	1	3	1	32	3	3	19	17	42	9	15	29	27	29	8	29	22	16	28	23	23	4	27	26	5	13	17	14	22	18	1	34	33
			1	8492	4	10	5	11	13	23	9	24	3	5	12	19	18	5	21	2	27	30	42	3	3	23	7	31	33	20	18	35	23	2	23	6	17	18	11	2	12	7	5	19	7	17	13	46	35
			2	8492	9	2	8	13	15	5	18	9	27	20	25	7	20	11	32	8	10	1	23	8	42	9	15	29	27	29	8	29	22	16	28	23	23	4	27	26	5	13	17	2	13	11	28	21	13
			1	22-D-99-02	4	10	5	11	13	23	9	24	3	5	12	19	18	5	21	2	27	30	42	2	3	23	7	31	33	20	18	35	23	2	23	6	17	18	11	2	12	7	5	19	7	17	13	46	35
			2	22-D-99-02	8	5	2	9	6	3	5	15	4	32	3	15	1	3	1	32	3	3	19	17	42	9	15	29	27	29	8	29	22	16	28	23	23	4	27	26	5	13	17	2	13	11	28	21	13
			1	11-M-98-03	9	2	8	13	15	5	18	9	27	20	24	23	21	16	13	34	42	29	2	17	39	10	19	23	4	5	24	5	27	23	21	26	13	18	11	2	12	7	5	19	7	17	13	46	35
			2	11-M-98-03	8	5	2	9	6	3	5	15	4	32	3	15	1	3	1	32	3	3	19	17	42	9	15	29	27	29	8	29	22	16	28	23	23	4	27	26	5	13	17	2	13	11	28	22	33
1994-2005			1	Varg0109	8	5	2	9	6	3	5	15	4	32	3	15	1	3	1	32	3	3	19	17	42	8	4	27	2	13	32	2	16	5	20	1	8	29	27	26	5	13	17	14	22	18	1	34	33
			2	Varg0109	8	5	2	9	6	3	5	15	4	32	3	15	1	3	1	32	3	2	2	17	39	10	19	23	4	5	24	5	27	23	21	26	13	18	11	2	12	7	5	19	7	17	13	46	35
			1	105-D-00-15	8	5	2	9	6	3	5	15	4	32	3	15	1	3	1	32	3	3	19	17	42	9	15	29	27	29	8	29	22	16	28	23	23	4	27	26	5	13	17	2	13	11	28	21	13
			2	105-D-00-15	13	9	5	4	2	20	16	10	6	23	32	35	12	5	21	2	27	30	42	2	2	27	4	27	2	13	32	2	16	5	20	1	8	29	27	26	5	13	17	14	22	18	1	34	33
			1	12-M-01-04	8	5	2	9	6	3	5	15	4	32	3	15	1	3	1	32	3	3	19	17	42	9	15	29	27	29	8	29	22	16	28	23	23	4	26	16	4	24	15	11	27	4	21	24	11
			2	12-M-01-04	13	9	5	4	2	20	16	10	6	23	32	35	12	5	21	1	3	3	19	17	42	9	15	29	27	29	8	29	22	16	28	23	23	4	27	26	5	13	17	2	13	11	28	22	33
			1	14-M-00-09	8	5	2	9	6	3	5	15	4	32	3	15	1	3	1	32	3	3	19	17	42	9	15	29	27	29	8	29	22	16	28	23	23	4	27	26	5	13	17	2	13	11	28	21	13
			2	14-M-00-09	13	9	5	4	2	20	16	10	6	23	32	35	12	5	21	2	30	3	19	17	42	8	4	27	2	13	32	2	16	5	20	1	8	29	27	26	4	24	15	11	27	4	21	24	11
			1	15-M-01-10	8	5	2	9	6	3	5	15	4	32	3	15	1	3	1	32	3	3	19	17	42	9	15	29	27	29	8	29	22	16	28	23	23	4	27	26	5	13	17	2	13	11	28	21	13
			2	15-M-01-10	8	5	2	9	6	3	5	15	4	32	3	15	1	3	1	32	3	3	19	17	42	8	4	27	2	13	32	2	16	5	20	1	8	29	27	26	5	13	17	14	22	18	1	34	33
			1	28-M-03-07	9	2	8	13	15	5	18	9	27	20	24	23	21	16	13	34	42	29	2	17	39	10	19	23	4	5	24	5	27	23	21	26	13	18	11	2	12	7	5	19	7	17	13	46	35
			2	28-M-03-07	8	5	2	9	6	3	5	15	4	32	3	15	1	3	1	32	3	3	19	17	42	9	15	29	27	29	8	29	22	16	28	23	23	4	27	26	5	13	17	2	13	11	28	21	13
			1	75-G9-05	8	5	2	9	6	3	5	15	4	32	3	15	1	3	1	32	3	3	19	17	42	9	15	29	27	29	8	29	22	16	28	23	23	4	26	16	4	24	15	11	27	4	21	24	11
			2	75-G9-05	9	2	8	13	15	5	18	9	27	20	25	7	20	11	32	8	10	1	23	8	2	27	4	27	2	13	32	2	16	5	20	1	8	29	27	26	5	13	17	14	22	18	1	34	33
			1	D-01-18	8	5	2	9	6	3	5	15	4	32	3	15	1	3	1	32	3	3	19	17	42	8	4	27	2	13	32	2	16	5	20	1	8	29	27	26	4	24	15	11	27	4	21	24	11
			2	D-01-18	8	5	2	9	6	3	5	15	4	32	3	15	1	3	1	32	3	3	19	17	42	9	15	29	27	29	8	29	22	16	28	23	23	4	27	26	5	13	17	2	13	11	28	21	13
			1	110-M-01-06	8	5	2	9	6	3	5	15	4	32	3	15	1	3	1	32	3	3	19	17	42	8	4	27	2	13	32	2	16	5	20	1	8	29	27	26	5	13	17	2	13	11	28	22	34
			2	110-M-01-06	8	5	2	9	6	3	5	15	4	32	3	15	1	3	1	32	3	3	19	17	42	9	15	29	27	29	8	29	22	16	28	23	23	4	27	26	5	13	17	2	13	11	28	22	33
			1	13-M-98-08	9	2	8	13	15	5	18	9	27	20	24	23	21	16	13	34	42	29	2	17	39	10	16	29	27	29	8	29	22	16	28	23	23	4	27	26	5	13	17	2	13	11	28	22	33
			2	13-M-98-08	8	5	2	9	6	3	5	15	4	32	3	15	1	3	1	32	3	3	19	17	42	9	15	29	27	29	8	29	22	16	28	23	23	4	26	16	4	24	15	11	27	4	21	27	11
			1	25-M-03-06	9	2	8	13	15	5	18	9	27	20	24	23	21	16	13	34	42	29	2	17	39	10	19	23	4	5	24	5	27	23	21	26	13	18	11	2	12	7	5	19	7	17	13	46	35
			2	25-M-03-06	8	5	2	9	6	3	5	15	4	32	3	15	1	3	1	32	3	3	19	17	42	8	4	27	2	13	32	2	16	5	20	1	8	29	27	26	5	13	17	14	22	18	1	34	33
			1	35-D-05-23	8	5	2	9	6	3	5	15	4	32	3	15	1	3	1	32	3	3	19	17	39	10	19	23	4	5	24	5	27	23	21	26	13	18	11	2	12	7	5	19	7	17	13	46	35
			2	35-D-05-23	8	5	2	9	6	3	5	15	4	32	3	15	1	3	1	32	3	3	19	17	42	9	15	29	27	29	8	29	22	16	28	23	23	4	27	26	5	13	17	2	13	11	28	22	33
			1	38-D-06-16	8	5	2	9	6	3	5	15	4	32	3	15	1	3	1	32	3	3	19	17	42	9	15	29	27	29	8	29	22	16	28	23	23	4	27	26	5	13	17	2	13	11	28	22	33
			2	38-D-06-16	8	5	2	9	6	3	5	15	4	32	3	15	1	3	1	32	3	3	19	17	42	8	4	27	2	13	32	2	16	5	20	1	8	29	27	26	5	13	17	14	22	18	1	34	33
			1	60-M-00-10	13	9	5	4	2	20	16	10	6	23	32	35	11	3	1	32	3	3	19	17	42	9	15	29	27	29	8	29	22	16	28	23	23	4	27	26	5	13	17	2	13	11	28	21	13
			2	60-M-00-10	13	9	5	4	2	20	16	10	6	23	32	35	12	5	21	2	30	3	19	17	42	8	4	27	2	13	32	2	16	5	20	1	8	29	27	26	4	24	15	11	27	4	21	24	11
			1	D-00-12	8	5	2	9	6	3	5	15	4	32	3	15	1	3	1	32	3	3	19	17	42	9	15	29	27	29	8	29	22	16	28	23	23	4	26	16	4	24	15	11	27	4	21	24	11
			2	D-00-12	13	9	5	4	2	20	16	10	7	32	3	15	1	3	1	32	3	3	19	17	42	9	15	29	27	29	8	29	22	16	28	23	23	4	27	26	5	13	17	2	13	11	28	22	33
			1	M-98-01	9	2	8	13	15	5	18	9	27	20	24	23	21	16	13	34	42	32	19	17	42	9	15	29	27	29	8	29	22	16	28	23	23	4	27	26	5	13	17	2	13	11	28	21	13
			2	M-98-01	13	9	5	4	2	20	16	10	6	23	32	35	11	3	1	32	3	3	19	17	42	9	15	29	27	29	8	29	22	16	28	23	23	4	27	26	4	24	15	11	27	4	21	24	11
			1	V009511	8	5	2	9	6	3	5	15	4	32	3	15	1	3	1	32	3	3	19	17	42	9	15	29	27	29	8	29	22	16	28	23	23	4	27	26	5	13	17	2	13	11	28	21	13
			2	V009511	8	5	2	9	6	3	5	15	4	32	3	15	1	3	1	32	3	3	19	17	42	8	4	27	2	13	32	2	16	5	20	3	23	4	27	26	5	13	17	2	13	11	28	21	13
			1	106-D-10-20	8	5	2	9	6	3	5	15	4	32	3	15	1	3	1	32	3	3	19	17	42	8	4	27	2	13	32	2	16	5	20	1	8	29	27	26	5	13	17	14	22	18	1	34	33
			2	106-D-10-20	8	5	2	9	6	3	5	15	4	32	3	15	1	3	1	32	3	3	19	17	39	10	19	23	4	5	24	5	27	23	21	26	13	18	11	2	12	7	5	19	7	17	13	46	35
			1	109-D-10-30	8	5	2	9	6	3	5	15	4	32	3	15	1	3	1	32	3	3	19	17	42	9	15	29	27	29	8	29	22	16	28	23	23	4	26	16	4	24	15	11	27	4	21	24	11
			2	109-D-10-30	8	5	2	9	6	3	5	15	4	32	3	15	1	3	1	32	3	3	19	17	42	9	15	29	27	29	8	29	22	16	28	23	23	4	26	16	4	24	15	11	27	4	21	24	11
			1	36-D-06-14	8	5	2	9	6	3	5	15	4	32	3	15	1	2	32	8	10	1	23	8	2	27	4	27	2	13	32	2	16	5	20	1	8	29	27	26	5	13	17	14	22	18	1	34	33
			2	36-D-06-14	8	5	2	9	6	3	5	15	4	32	3	15	1	3	1	32	3	3	19	17	42	9	15	29	27	29	8	29	22	16	28	23	23	4	27	26	5	13	17	2	13	11	28	22	33
			1	37-M-06-03	8	5	2	9	6	3	5	15	4	32	3	15	1	3	1	32	3	3	19	17	42	8	4	27	2	13	32	2	16	5	20	1	8	29	27	24	4	24	15	11	27	4	21	24	11
			2	37-M-06-03	8	5	2	9	6	3	5	15	4	32	3	15	1	3	1	32	3	3	19	17	42	9	15	29	27	29	8	29	22	16	28	23	23	4	26	16	4	24	15	11	27	4	21	24	11
			1	39-M-06-04	8	5	2	9	6	3	5	15	4	32	3	15	1	3	1	32	3	3	19	17	42	8	4	27	2	13	32	2	16	5	20	1	8	29	27	24	4	24	15	11	27	4	21	24	11
			2	39-M-06-04	8	5	2	9	6	3	5	15	4	32	3	15	1	3	1	32	3	3	19	17	42	9	15	29	27	29	8	29	22	16	28	23	23	4	27	26	5	13	17	2	13	11	28	22	33
			1	40-D-07-28	8	5	2	9	6	3	5	15	4	32	3	15	1	3	1	32	3	3	19	17	42	8	3	29	27	29	8	29	22	16	28	23	23	4	27	26	5	13	17	2	13	11	28	22	33
			2	40-D-07-28	8	5	2	9	6	3	5	15	4	32	3	15	1	3	1	32	3	3	19	17	42	9	15	29	27	29	8	29	22	16	28	23	23	4	27	26	5	13	17	2	13	11	28	22	33
			1	55-D-08-10	8	5	2	9	6	3	5	15	4	32	3	15	1	3	1	32	3	3	19	17	42	8	4	27	2	13	32	2	16	5	20	1	8	29	27	26	5	13	17	14	22	18	1	34	33
			2	55-D-08-10	9	2	8	13	15	5	18	9	27	20	23	15	1	3	1	32	3	3	19	17	42	9	15	29	27	29	8	29	22	16	28	23	23	4	27	26	5	13	17	2	13	11	28	22	33
			1	80-M-09-17	8	5	2	9	6	3	5	15	4	32	3	15	1	3	1	32	3	3	19	17	42	9	15	29	27	29	8	29	22	16	28	23	23	4	27	26	5	13	17	2	13	11	28	21	13
			2	80-M-09-17	8	5	2	9	6	3	5	15	4	32	3	15	1	3	1	32	3	3	19	17	42	9	15	29	27	29	8	29	22	16	28	23	23	4	27	26	5	13	17	2	13	11	28	21	13
			1	D-08-20	8	5	2	9	6	3	5	15	4	32	3	15	1	3	1	32	3	3	19	17	42	8	4	27	2	13	32	2	16	5	20	1	8	29	27	26	5	13	17	14	22	18	1	34	33
			2	D-08-20	8	5	2	9	6	3	5	15	4	32	3	15	1	3	1	32	3	3	19	17	39	10	19	23	4	5	24	5	27	23	21	26	13	18	11	2	12	7	5	19	7	17	13	46	35
			1	M-05-07	8	5	2	9	6	3	5	15	4	32	3	15	1	3	1	32	3	3	19	17	42	8	4	27	2	13	32	2	16	5	20	1	8	29	27	24	4	24	15	11	27	4	21	24	11
			2	M-05-07	8	5	2	9	6	3	5	15	4	32	3	15	1	3	1	32	3	3	19	17	42	9	15	29	27	29	8	29	22	16	28	23	23	4	26	16	4	24	15	11	27	4	21	24	11
			1	81-M-09-05	8	5	2	9	6	3	5	15	4	32	3	15	1	3	1	32	3	3	19	17	42	8	4	27	2	13	32	2	16	5	20	1	8	29	27	24	4	24	15	11	27	4	21	24	11
			2	81-M-09-05	8	5	2	9	6	3	5	15	4	32	3	15	1	3	1	32	3	3	19	17	39	10	19	23	4	5	24	5	27	23	21	26	13	18	11	2	12	7	5	19	7	17	13	46	35
2006-2014			1	103-D-11-17	8	5	2	9	6	3	5	15	4	32	3	15	1	3	1	32	3	3	19	17	42	9	15	29	27	29	8	29	22	16	28	23	23	4	27	26	5	13	17	2	13	11	28	21	13
			2	103-D-11-17	8	5	2	9	6	3	5	15	4	32	3	15	1	3	1	32	3	3	19	17	42	9	15	29	27	29	8	29	22	16	28	23	23	4	26	16	4	24	15	11	27	4	21	24	11
			1	112-D-10-29	9	2	8	13	15	5	18	9	27	20	25	7	20	11	32	8	10	1	23	8	2	27	4	27	2	13	32	2	16	5	20	1	8	29	27	26	5	13	17	14	22	18	1	34	33
			2	112-D-10-29	8	5	2	9	6	3	5	15	4	32	3	15	1	3	1	32	3	3	19	17	39	10	19	23	4	5	24	5	27	23	21	26	13	18	11	2	12	7	5	19	7	17	13	46	35
			1	45-D-07-24	9	2	8	13	15	5	18	9	27	20	24	23	21	16	13	34	42	29	2	17	39	13	15	29	27	29	8	29	22	16	28	23	23	4	26	16	4	24	15	11	25	11	28	21	13
			2	45-D-07-24	9	2	8	13	15	5	18	9	27	20	24	23	21	16	13	34	42	32	19	17	42	9	15	29	27	29	8	29	22	16	28	23	23	4	27	26	5	13	17	2	13	11	28	21	13
			1	48-D-08-21	8	5	2	9	6	3	5	15	4	32	3	15	1	3	1	32	3	3	19	17	42	8	4	27	2	13	32	2	16	5	20	1	8	29	27	24	4	24	15	11	27	4	21	24	11
			2	48-D-08-21	8	5	2	9	6	3	5	15	4	32	3	15	1	3	1	32	3	3	19	17	39	10	19	23	4	5	24	5	27	23	21	26	13	18	11	2	12	7	5	19	7	17	13	46	35
			1	51-D-07-09	8	5	2	9	6	3	5	15	4	32	3	15	1	3	1	32	3	11	42	2	2	27	4	27	2	13	32	2	16	5	20	1	8	29	27	26	5	13	17	14	22	18	1	34	33
			2	51-D-07-09	13	9	5	4	2	20	16	10	6	23	32	35	12	5	21	2	27	30	42	2	2	27	4	27	2	13	32	2	16	5	20	1	8	29	27	26	5	13	17	14	22	18	1	34	33
			1	52-D-07-17	8	5	2	9	6	3	5	15	4	32	3	15	1	3	1	32	3	3	19	17	42	9	15	29	27	29	8	29	22	16	28	23	23	4	27	26	5	13	17	14	22	18	1	34	33
			2	52-D-07-17	8	5	2	9	6	3	5	15	4	32	3	15	1	3	1	32	3	3	19	17	42	8	4	27	2	13	32	2	16	5	20	1	8	29	27	26	5	13	17	14	23	11	28	21	13
			1	53-D-08-08	8	5	2	9	6	3	5	15	4	32	3	15	1	3	1	32	3	3	19	17	42	9	15	29	27	29	8	29	22	16	28	23	23	4	27	26	5	13	17	2	13	11	28	21	13
			2	53-D-08-08	8	5	2	9	6	3	5	15	4	32	3	15	1	3	1	32	3	3	19	17	42	8	4	27	2	13	32	2	16	5	20	1	8	29	27	26	5	13	17	14	23	11	28	21	13
			1	54-M-07-06	8	5	2	9	6	3	5	15	4	32	3	15	1	3	1	32	3	3	19	17	42	9	15	29	27	29	8	29	22	16	28	23	23	4	27	26	5	13	17	2	13	11	28	21	13
			2	54-M-07-06	8	5	2	9	6	3	5	15	4	32	3	15	1	3	1	32	3	3	19	17	42	9	15	29	27	29	8	29	22	16	28	23	23	4	26	16	4	24	15	11	27	4	21	24	11
			1	56-D-07-16	8	5	2	9	6	3	5	15	4	32	3	15	1	3	1	32	3	3	19	17	42	9	15	29	27	29	8	29	22	16	28	23	23	4	27	26	5	13	17	2	13	11	28	21	13
			2	56-D-07-16	8	5	2	9	6	3	5	15	4	32	3	15	1	3	1	32	3	3	19	17	42	8	4	27	2	13	32	2	16	5	20	1	8	29	27	26	5	13	17	14	22	18	1	34	33
			1	D-08-19	9	2	8	13	15	5	18	9	27	20	25	7	20	11	32	8	10	1	23	8	2	9	15	29	27	29	8	29	22	16	28	23	23	4	27	26	5	13	17	2	13	11	28	21	13
			2	D-08-19	8	5	2	9	6	3	5	15	4	32	3	15	1	3	1	32	3	3	19	17	41	10	19	23	4	5	24	5	27	23	21	26	13	18	11	2	12	7	5	19	7	17	13	46	35
			1	102-G34-10	8	5	2	9	6	3	5	15	4	32	3	15	1	3	1	32	3	3	19	17	42	9	15	29	27	29	8	29	22	16	28	23	23	4	27	26	5	13	17	2	13	11	28	21	13
			2	102-G34-10	9	1	2	9	6	3	5	15	4	32	3	15	1	3	1	32	3	3	19	17	42	9	15	29	27	29	8	29	22	16	28	23	23	4	27	26	5	13	17	2	13	11	28	22	33
			1	111-G110-11	9	2	8	13	15	5	18	9	27	20	25	7	20	11	32	8	10	1	23	8	2	27	4	27	2	13	32	2	16	5	20	1	8	29	27	26	5	13	17	14	22	18	1	34	33
			2	111-G110-11	8	5	2	9	6	3	5	15	4	32	3	15	1	3	1	32	3	3	19	17	42	8	4	27	2	13	32	2	16	5	20	1	8	29	27	26	5	13	17	14	22	18	1	34	33
			1	61-G97-13	9	2	8	13	15	5	18	9	27	20	24	23	21	16	13	34	42	29	2	17	39	10	19	23	4	5	24	5	27	23	21	26	13	18	11	2	12	7	5	19	7	17	13	46	35
			2	61-G97-13	8	5	2	9	6	3	5	15	4	32	3	15	1	3	1	32	3	3	19	17	42	9	15	29	27	29	8	29	22	16	28	23	23	4	27	26	5	13	17	2	13	11	28	21	13
			1	62-G174-13	8	5	2	9	6	3	5	15	4	32	3	15	1	3	1	32	3	3	19	17	42	9	15	29	27	29	8	29	22	16	28	23	23	4	27	26	5	13	17	2	13	11	28	21	13
			2	62-G174-13	13	9	5	4	1	3	5	15	4	32	3	15	1	3	1	32	3	3	19	17	42	9	15	29	27	29	8	29	17	5	20	1	8	29	27	26	5	13	17	14	22	18	1	34	33
			1	68-D-10-68	8	5	2	9	6	3	5	15	4	32	3	15	1	3	1	32	3	3	19	17	42	8	4	27	2	13	32	2	16	5	20	1	8	29	27	26	5	13	17	14	22	18	1	34	33
			2	68-D-10-68	8	5	2	9	6	3	5	15	4	32	3	15	1	3	1	32	3	3	19	17	42	8	4	27	2	13	32	2	16	5	20	1	8	29	27	26	5	13	17	14	22	18	1	34	33
			1	69-D-10-15	9	2	8	13	15	5	18	9	27	20	24	23	21	16	13	34	42	29	2	17	40	9	15	29	27	29	8	29	22	16	28	23	23	4	27	26	5	13	17	2	13	11	28	22	33
			2	69-D-10-15	9	2	8	13	15	5	18	9	27	20	24	23	21	16	13	34	42	29	2	17	40	9	15	29	27	29	8	29	22	16	28	23	23	4	27	26	5	13	17	2	13	11	28	22	33
			1	108-D-10-44	9	2	8	13	15	5	18	9	27	20	24	23	21	16	13	34	42	29	2	17	40	9	15	29	27	29	8	29	22	16	28	23	23	4	27	26	5	13	17	2	13	11	28	22	33
			2	108-D-10-44	9	2	8	13	15	5	18	9	27	20	24	23	21	16	13	34	42	29	2	17	40	9	15	29	27	29	8	29	22	16	28	23	23	4	27	26	5	13	17	2	13	11	28	22	33
			1	70-D-10-23	8	5	2	9	6	3	5	15	4	32	3	15	1	3	1	32	3	3	19	17	42	9	15	29	27	29	8	29	22	16	28	23	23	4	27	26	5	13	17	2	13	11	28	21	13
			2	70-D-10-23	8	5	2	9	6	3	5	15	4	32	3	15	1	3	1	32	3	3	19	17	42	9	15	29	27	29	8	29	22	16	28	23	23	4	27	26	5	13	17	2	13	11	28	23	33
			1	92-G58-15	9	2	8	13	15	5	18	9	27	20	24	23	1	3	1	32	3	3	19	17	39	10	19	23	4	5	24	5	27	23	21	26	13	18	11	2	12	7	5	19	7	17	13	46	35
			2	92-G58-15	9	2	8	13	15	5	18	9	27	20	24	23	21	16	13	34	42	32	19	17	42	9	15	29	27	29	7	5	27	23	21	26	13	18	11	2	12	7	5	19	7	17	13	46	35
			1	73-D-11-22	8	5	2	9	6	3	5	15	4	32	3	15	1	3	1	32	3	3	19	17	42	9	15	29	27	29	8	29	22	16	28	23	23	4	26	24	4	24	15	11	27	4	21	24	11
			2	73-D-11-22	8	5	2	9	6	3	5	15	4	32	3	15	1	3	1	32	3	3	19	17	42	9	15	29	27	29	8	29	22	16	28	23	23	4	26	16	4	24	15	11	27	4	21	24	11
			1	77-G87-12	9	2	8	13	15	5	18	9	27	20	24	23	21	16	13	34	42	29	2	17	40	9	15	29	27	29	8	29	22	16	28	23	23	4	27	26	5	13	17	2	13	11	28	22	33
			2	77-G87-12	8	5	2	9	6	3	5	15	4	32	3	15	1	3	1	32	3	2	2	17	39	10	19	23	2	5	24	5	27	23	21	25	8	29	27	26	5	13	17	14	22	18	1	34	33
			1	78-D-11-58	8	5	2	9	6	3	5	15	4	32	3	15	1	3	1	32	3	3	19	17	42	9	15	29	27	29	8	29	22	16	28	23	23	4	27	26	5	13	17	2	13	11	28	21	13
			2	78-D-11-58	9	2	8	13	15	5	18	9	27	20	24	23	21	17	1	32	3	3	19	17	42	8	4	27	2	13	32	2	16	5	20	1	8	29	27	26	5	13	17	14	22	18	1	34	33
			1	86-G126-13	8	5	2	9	6	3	5	15	4	32	3	15	1	3	1	32	3	3	19	17	42	8	4	27	2	13	32	2	16	5	20	1	8	29	27	24	4	24	15	11	27	4	21	24	11
			2	86-G126-13	8	5	2	9	6	3	5	15	4	32	3	15	1	3	2	34	42	29	2	17	40	9	15	29	27	29	21	5	27	23	21	26	13	18	11	2	12	7	5	19	7	17	13	46	35
			1	88-G50-12	8	5	2	9	6	3	5	15	4	32	3	15	1	3	1	32	3	3	19	17	42	8	4	27	2	13	32	2	16	5	20	1	8	29	27	24	4	24	15	11	27	4	21	24	11
			2	88-G50-12	8	5	2	9	6	3	5	15	4	32	3	15	1	3	1	32	3	3	19	17	42	8	4	27	2	13	32	2	16	5	20	1	8	29	27	26	5	13	17	14	22	18	1	34	33
			1	91-G24-14	8	5	2	9	6	3	5	15	4	32	3	15	1	3	1	32	3	3	19	17	39	10	19	23	4	5	24	5	27	23	21	26	13	18	11	2	12	7	5	19	7	17	13	46	35
			2	91-G24-14	8	5	2	9	6	3	5	15	4	32	3	15	1	3	1	32	3	3	19	17	42	9	15	29	27	29	8	29	22	16	28	23	23	4	27	26	5	13	17	2	13	11	28	21	13
			1	95-G175-13	8	5	2	9	6	3	5	15	4	32	3	15	1	3	1	32	3	3	19	17	42	8	4	27	2	13	32	2	16	5	20	1	8	29	27	24	4	24	15	11	27	4	21	24	11
			2	95-G175-13	8	5	2	9	6	3	5	15	4	32	3	15	1	3	1	32	3	3	19	17	42	8	4	27	2	13	32	2	16	5	20	1	8	29	27	26	5	13	17	14	22	18	1	34	33
			1	97-G32-12	8	5	2	9	6	3	5	15	4	32	3	15	1	3	1	32	3	3	19	17	42	9	15	29	27	29	8	29	22	16	28	23	23	4	27	26	5	13	17	2	13	11	28	21	13
			2	97-G32-12	8	5	2	9	6	3	5	15	4	32	3	15	1	3	1	32	3	3	19	17	42	9	15	29	27	29	8	29	22	16	28	23	23	4	26	16	4	24	15	11	27	4	21	24	11
			1	D-10-50	8	5	2	9	6	3	5	15	4	32	3	15	1	3	1	32	3	3	19	17	42	9	15	29	27	29	8	29	22	16	28	23	23	4	26	16	4	24	15	11	27	4	21	24	11
			2	D-10-50	8	5	2	9	6	3	5	15	4	32	3	15	1	3	1	32	3	3	19	17	39	10	19	23	4	5	24	5	27	23	21	26	13	18	11	2	12	7	5	19	7	17	13	46	35
Founder haplotype assignment:
Female founder			1	F_1	8	5	2	9	6	3	5	15	4	32	3	15	1	3	1	32	3	3	19	17	42	9	15	29	27	29	8	29	22	16	28	23	23	4	27	26	5	13	17	2	13	11	28	21	13
			2	F_2	10	14	11	17	12	9	12	23	10	12	37	19	19	13	15	45	45	28	21	25	5	23	1	35	25	7	19	10	23	4	5	29	24	20	20	5	13	5	1	7	26	28	21	25	36
First male founder			1	M1_1	9	2	8	13	15	5	18	9	27	20	25	7	20	11	32	8	10	1	23	9	31	12	1	35	25	9	11	35	23	2	23	13	4	33	41	16	4	24	15	11	27	4	21	24	11
			2	M1_2	13	9	5	4	2	20	16	10	6	23	32	35	12	5	21	2	27	30	42	2	2	27	4	27	2	13	32	2	16	5	20	1	8	29	27	26	5	13	17	14	22	18	1	34	33
Second male founder			1	M2_1	9	2	8	13	15	5	18	9	27	20	24	23	21	16	13	34	42	29	2	17	39	10	19	23	4	5	24	5	27	23	21	26	13	18	11	2	12	7	5	19	7	17	13	46	35
			2	M2_2	4	10	5	11	13	23	9	24	3	5	12	19	18	5	21	2	27	30	42	3	3	23	7	31	33	20	18	35	23	2	23	6	17	18	11	2	12	7	5	19	7	17	13	46	35
[truncated: 33 more columns]

## Sheet: chr7_1Mb
				window:	0	1	2	3	4	5	6	7	8	9	10	11	12	13	14	15	16	17	18	19	20	21	22	23	24	25	26	27	28	29	30	31	32	33	34	35	36	37	38	39	40	41	42	43	44
Female founder			1	D-85-01	5	2	1	21	19	28	22	17	11	19	36	18	10	20	2	14	35	36	21	12	30	30	26	10	4	33	31	16	11	1	2	28	3	8	1	1	1	23	29	18	35	11	7	4	1
			2	D-85-01	24	6	11	7	21	20	28	29	31	1	1	11	8	2	4	25	7	5	19	8	17	3	20	26	28	31	1	5	21	9	13	34	10	1	18	5	9	1	18	22	26	14	3	1	34
1983-1993	First male founder	F1 offspring	1	D-84-03	21	1	9	18	4	19	19	21	15	10	44	2	24	29	6	1	2	8	4	6	4	7	1	4	16	9	9	11	4	2	33	13	31	21	9	29	20	26	12	26	40	8	1	8	22
			2	D-84-03	5	2	1	21	19	28	22	17	11	19	36	18	10	20	2	14	35	36	21	12	30	30	26	10	4	33	31	16	11	1	2	28	3	8	1	1	1	23	29	18	35	11	7	4	1
			1	D-85-02	7	11	14	20	15	10	1	14	21	5	41	13	5	19	1	20	11	8	4	6	4	10	28	24	18	18	13	13	13	29	6	18	32	18	27	23	10	17	21	9	40	8	1	8	22
			2	D-85-02	24	6	11	7	21	20	28	29	31	1	1	11	8	2	4	25	7	5	19	8	17	3	20	26	28	31	1	5	21	9	13	34	10	1	18	5	9	1	18	22	26	14	3	1	34
			1	3-D-86-01	7	11	14	20	15	10	1	14	21	5	41	13	5	19	1	20	11	8	4	6	4	10	28	24	18	18	13	13	13	29	6	18	32	18	27	23	10	17	21	9	40	8	1	8	22
			2	3-D-86-01	24	6	11	7	21	20	28	29	31	1	1	11	8	2	4	25	7	5	19	8	17	3	20	26	28	31	1	5	21	9	13	34	10	1	18	5	9	1	18	22	26	14	3	1	34
		F2 offspring	1	4-D-89-01	5	2	1	21	19	28	22	17	11	19	36	18	10	20	2	11	11	8	4	6	4	10	28	24	18	18	13	13	13	29	6	18	32	18	27	23	10	17	21	9	40	8	1	8	22
			2	4-D-89-01	5	2	1	21	19	28	22	17	11	19	36	18	10	20	2	14	35	36	21	12	30	30	26	10	4	33	31	16	11	1	2	28	3	8	1	1	1	23	29	18	35	11	7	4	1
			1	5-D-91-01	5	2	1	21	19	28	22	17	11	19	36	18	10	20	2	14	35	36	21	12	30	30	26	10	4	33	31	16	11	1	2	28	3	8	1	1	1	23	29	18	35	11	7	4	1
			2	5-D-91-01	7	11	14	20	15	10	1	14	21	5	41	13	5	19	1	20	11	8	4	6	4	10	28	24	18	18	13	13	13	29	6	18	32	18	27	23	10	17	21	9	40	8	1	8	22
			1	16-D-89-03	7	11	14	20	15	10	1	14	21	5	41	13	5	19	1	20	11	8	4	6	4	10	29	10	4	33	31	16	11	1	2	28	3	8	1	1	1	23	29	18	35	11	7	4	1
			2	16-D-89-03	7	11	14	20	15	10	1	14	21	5	41	13	5	19	1	20	11	8	4	6	4	10	28	24	18	18	13	13	13	29	6	18	32	18	27	23	10	17	21	9	40	8	1	8	22
			1	17-D-92-05	5	2	1	21	19	28	22	17	11	19	36	18	10	20	2	14	35	36	21	12	30	30	26	10	4	33	31	16	11	1	2	28	3	8	1	1	1	23	29	18	35	11	7	4	1
			2	17-D-92-05	7	11	14	20	15	10	1	14	21	5	41	13	5	19	1	20	11	8	4	6	4	10	28	24	18	18	13	13	13	29	6	18	32	18	27	23	10	17	21	9	40	8	1	8	22
			1	30-D-93-02	21	1	9	18	4	19	19	21	15	10	44	2	24	29	6	1	2	8	4	6	4	7	1	4	16	9	9	11	4	2	33	13	31	21	9	29	20	29	21	9	40	8	1	8	22
			2	30-D-93-02	7	11	14	20	15	10	1	14	21	5	41	13	5	19	1	20	11	8	4	6	4	10	28	24	18	18	13	13	13	29	6	18	32	18	27	23	10	17	21	9	40	8	1	8	22
		F3 offspring	1	6-M-98-02	21	1	9	18	4	19	19	21	15	10	44	2	24	29	6	1	2	8	4	6	4	7	1	4	16	9	9	11	4	2	33	13	31	21	9	29	20	29	21	9	40	8	1	8	22
			2	6-M-98-02	5	2	1	21	19	28	22	17	11	19	36	18	10	20	2	14	35	36	21	12	30	30	26	10	4	33	31	16	11	1	2	28	3	8	1	1	1	23	29	18	35	11	7	4	1
			1	31-D-93-03	5	2	1	21	19	28	22	17	11	19	36	18	10	20	2	14	35	36	21	12	30	30	26	10	4	33	31	16	11	1	2	28	3	8	1	1	1	23	29	18	35	11	7	4	1
			2	31-D-93-03	5	2	1	21	19	28	22	17	11	19	36	18	10	20	2	14	35	36	21	12	30	30	26	10	4	33	31	16	11	1	2	28	3	8	1	1	1	23	29	18	37	8	1	8	22
			1	19-D-94-01	5	2	1	21	19	28	22	17	11	19	36	18	10	20	2	14	35	36	21	12	30	30	26	10	4	33	31	16	11	1	2	28	3	8	1	1	1	23	29	18	35	11	7	4	1
			2	19-D-94-01	7	11	14	20	15	10	1	14	21	5	41	13	5	19	1	20	11	8	4	6	4	10	28	24	18	18	13	13	13	29	6	18	32	18	27	23	10	17	21	9	40	8	1	8	22
			1	57-D-92-06	21	1	9	18	4	19	19	21	15	10	44	2	24	29	6	1	2	8	4	6	4	8	26	10	4	33	31	16	11	1	2	28	3	8	1	1	1	23	29	18	35	11	7	4	1
			2	57-D-92-06	5	2	1	21	19	28	22	17	11	19	36	18	10	20	2	14	35	36	21	12	30	30	26	10	4	33	31	16	11	1	2	28	3	8	1	1	1	23	29	18	35	11	7	4	1
	Second male founder	F1 offspring	1	94-D-92-01	21	1	9	18	4	19	19	21	15	10	44	2	24	29	7	14	35	36	21	12	30	30	26	10	4	33	31	16	11	1	2	28	3	8	1	1	1	23	29	18	35	11	7	4	1
			2	94-D-92-01	13	8	8	13	10	6	23	5	23	34	32	1	23	5	25	14	37	17	30	19	21	20	3	1	12	14	33	17	18	16	23	29	2	18	27	23	10	17	21	9	40	8	1	8	22
			1	59-D-96-01	21	1	9	18	4	19	19	21	15	10	44	2	24	29	6	1	2	8	4	6	4	7	1	4	16	9	9	11	4	2	33	13	31	21	9	29	20	26	12	26	42	5	25	29	22
			2	59-D-96-01	13	8	8	13	10	6	23	5	23	34	32	1	23	5	25	14	37	17	30	19	21	20	3	1	12	14	33	17	18	16	23	29	2	18	27	23	10	17	21	9	40	8	1	8	22
			1	43-D-92-02	21	1	9	18	4	19	19	21	15	10	44	2	24	29	6	1	2	8	4	6	4	7	1	4	16	9	10	16	11	1	2	28	3	8	1	1	1	23	29	18	35	11	7	4	1
			2	43-D-92-02	13	8	8	13	10	6	23	5	23	34	32	1	23	5	25	14	37	17	30	19	21	20	3	1	12	14	33	17	18	16	23	29	2	18	27	23	10	17	21	9	40	8	1	8	22
			1	D-93-01	5	2	1	21	19	28	22	17	11	19	36	18	10	20	2	14	35	36	21	12	30	30	26	10	4	33	31	16	11	1	2	28	3	8	1	1	1	23	29	18	35	11	7	4	1
			2	D-93-01	13	8	8	13	10	6	23	5	23	34	32	1	23	5	25	14	37	17	30	19	21	20	3	1	12	14	33	17	18	16	23	29	2	18	27	23	10	17	21	9	40	8	1	8	22
			1	8492	5	2	1	21	19	28	22	17	11	19	36	18	10	20	2	14	35	36	21	12	30	30	26	10	4	33	31	16	11	1	2	28	3	8	1	1	1	23	29	18	35	11	7	4	1
			2	8492	13	8	8	13	10	6	23	5	23	34	32	1	23	5	25	14	37	17	30	19	21	20	3	1	12	14	33	17	18	16	23	29	2	18	27	23	10	17	21	9	40	8	1	8	22
			1	22-D-99-02	21	1	9	18	4	19	19	21	15	10	44	2	24	29	6	1	2	8	4	6	4	7	1	4	16	9	9	11	4	2	33	13	31	21	9	29	20	26	12	26	42	5	25	29	22
			2	22-D-99-02	13	8	8	13	10	6	23	5	23	34	32	1	23	5	25	14	36	6	30	19	21	20	3	1	12	14	33	22	1	19	5	2	21	25	23	27	22	8	1	15	34	21	3	20	20
			1	11-M-98-03	21	1	9	18	4	19	19	21	15	10	44	2	24	29	6	1	2	8	4	6	4	7	1	4	16	9	8	16	11	1	2	28	3	8	1	1	1	23	29	18	35	11	7	4	1
			2	11-M-98-03	13	8	8	13	10	6	23	5	23	34	32	1	23	5	25	14	37	17	30	19	21	20	3	1	12	14	33	17	18	16	23	29	2	18	27	23	10	17	20	15	34	21	3	20	20
1994-2005			1	Varg0109	21	1	9	18	4	19	19	21	15	10	44	2	24	29	6	1	2	8	4	6	4	7	1	4	16	9	9	11	4	2	33	13	31	21	9	29	20	29	21	9	40	8	1	8	22
			2	Varg0109	13	8	8	13	10	6	23	5	23	34	32	1	23	5	25	14	37	17	30	19	21	20	3	1	12	14	33	17	18	16	23	29	2	18	27	23	1	23	29	18	35	11	7	4	1
			1	105-D-00-15	5	2	1	21	19	28	22	17	11	19	36	18	10	20	2	14	35	36	21	12	30	30	26	10	4	33	31	16	11	1	2	28	3	8	1	1	1	23	29	18	35	11	7	4	1
			2	105-D-00-15	7	11	14	20	15	10	1	14	21	5	41	13	5	18	2	14	35	36	21	12	30	30	26	10	4	33	31	16	11	1	2	28	3	8	1	1	1	23	29	18	35	11	7	4	1
			1	12-M-01-04	21	1	9	18	4	19	21	17	11	19	36	18	10	20	2	14	35	36	21	12	30	30	26	10	4	33	31	16	11	1	2	28	3	8	1	1	1	23	29	18	35	11	7	4	1
			2	12-M-01-04	13	8	8	13	10	6	23	5	23	34	32	1	23	5	25	14	37	17	30	19	21	20	3	1	16	9	8	16	11	1	2	28	3	8	1	1	1	23	29	18	35	11	7	4	1
			1	14-M-00-09	5	2	1	21	19	28	22	17	11	19	36	18	10	20	2	14	35	36	21	12	30	30	26	10	4	33	31	16	11	1	2	28	3	8	1	1	1	23	29	18	35	11	7	4	1
			2	14-M-00-09	7	11	14	20	15	10	1	14	21	5	41	13	5	18	2	14	35	36	21	12	30	30	26	10	4	33	31	16	11	1	2	28	3	8	1	1	1	23	29	18	35	11	7	4	1
			1	15-M-01-10	5	2	1	21	19	28	22	17	11	19	36	18	10	20	2	14	35	36	21	12	30	30	26	10	4	33	31	16	11	1	2	28	3	8	1	1	1	23	29	18	35	11	7	4	1
			2	15-M-01-10	7	11	14	20	15	10	1	14	21	5	41	13	5	18	2	14	35	36	21	12	30	30	26	10	4	33	31	16	11	1	2	28	3	8	1	1	1	23	29	18	35	11	7	4	1
			1	28-M-03-07	7	11	14	20	15	10	1	14	21	5	41	13	5	18	2	14	35	36	21	12	30	30	26	10	4	33	31	16	11	1	2	28	3	8	1	1	1	23	29	18	35	11	7	4	1
			2	28-M-03-07	13	8	8	13	10	6	23	5	23	34	32	1	23	5	25	14	37	17	30	19	21	20	3	1	12	14	33	17	18	16	23	31	3	8	1	1	1	23	29	18	35	11	7	4	1
			1	75-G9-05	5	2	1	21	19	28	22	17	11	19	36	18	10	20	3	1	3	6	30	19	21	20	3	1	12	14	33	22	1	19	5	2	21	25	23	27	22	8	1	15	34	21	3	20	20
			2	75-G9-05	5	2	1	21	19	28	22	17	11	19	36	18	10	20	2	14	35	36	21	12	30	30	26	10	4	33	31	16	11	1	2	28	3	8	1	1	1	23	29	18	35	11	7	4	1
			1	D-01-18	21	1	9	18	4	19	19	21	15	10	44	2	24	29	6	1	2	8	4	6	4	7	1	4	16	9	9	11	4	2	33	13	31	21	9	29	20	29	21	9	40	8	1	8	22
			2	D-01-18	5	2	1	21	19	28	22	17	11	19	36	18	10	20	2	14	35	36	21	12	30	30	26	10	4	33	31	16	11	1	2	28	3	8	1	1	1	23	29	18	35	11	7	4	1
			1	110-M-01-06	5	2	1	21	19	28	22	17	11	19	36	18	10	20	2	14	35	36	21	12	30	30	26	10	4	33	31	16	11	1	2	28	3	8	1	1	1	23	30	9	40	8	1	8	22
			2	110-M-01-06	13	8	8	13	10	6	23	5	23	34	32	1	23	5	25	14	37	17	30	19	21	20	3	1	16	9	8	16	11	1	2	28	3	8	1	1	1	23	29	18	35	11	7	4	1
			1	13-M-98-08	21	1	9	18	4	19	19	21	15	10	44	2	24	29	6	1	2	8	4	6	4	7	1	4	16	9	9	11	4	2	33	13	31	21	9	29	20	29	21	9	40	8	1	8	22
			2	13-M-98-08	13	8	8	13	10	6	23	5	23	34	32	1	23	5	25	14	37	17	30	19	21	20	3	1	12	14	33	17	18	16	23	29	2	18	27	23	10	17	20	15	34	21	3	20	20
			1	25-M-03-06	13	8	8	13	10	6	23	5	23	34	32	1	23	5	25	14	37	17	30	19	21	20	3	1	12	14	33	17	18	16	23	29	2	18	27	23	10	17	21	9	40	8	1	8	22
			2	25-M-03-06	13	8	8	13	10	6	23	5	23	34	32	1	23	5	25	14	37	17	30	19	21	20	3	1	12	14	33	17	18	16	23	31	3	8	1	1	1	23	29	18	35	11	7	4	1
			1	35-D-05-23	21	1	9	18	4	19	19	21	15	10	44	2	24	29	6	1	2	8	4	6	4	7	1	4	16	9	8	16	11	1	2	28	3	8	1	1	1	23	29	18	35	11	7	4	1
			2	35-D-05-23	13	8	8	13	10	6	23	5	23	34	32	1	23	5	25	12	3	6	30	19	21	21	26	10	4	33	31	16	11	1	2	28	3	8	1	1	1	23	29	18	35	11	7	4	1
			1	38-D-06-16	5	2	1	21	19	28	22	17	11	19	36	18	10	20	2	14	35	36	21	12	30	30	26	10	4	33	31	16	11	1	2	28	3	8	1	1	1	23	29	18	35	11	7	4	1
			2	38-D-06-16	13	8	8	13	10	6	23	5	23	34	32	1	23	5	25	14	37	17	30	19	23	30	26	10	4	33	31	16	11	1	2	28	3	8	1	1	1	23	30	9	40	8	1	8	22
			1	60-M-00-10	5	2	1	21	19	28	22	17	11	19	36	18	10	20	2	14	35	36	21	12	30	30	26	10	4	33	31	16	11	1	2	28	3	8	1	1	1	23	29	18	35	11	7	4	1
			2	60-M-00-10	5	2	1	21	19	28	22	17	11	19	36	18	10	20	2	14	35	36	21	12	30	30	26	10	4	33	31	16	11	1	2	28	3	8	1	1	1	23	29	18	35	11	7	4	1
			1	D-00-12	5	2	1	21	19	28	22	17	11	19	36	18	10	20	2	14	35	36	21	12	30	29	28	24	18	18	13	13	13	29	6	18	32	18	27	23	10	17	21	9	40	8	1	8	22
			2	D-00-12	13	8	8	13	10	6	23	5	23	34	32	1	23	5	25	14	37	17	30	19	21	20	3	1	12	15	9	11	4	2	33	13	31	21	9	29	20	29	21	9	40	8	1	8	22
			1	M-98-01	13	8	8	13	10	6	23	5	23	34	31	2	24	29	6	1	2	8	4	6	4	7	1	4	16	9	9	11	4	2	33	13	31	21	9	29	20	29	21	9	40	8	1	8	22
			2	M-98-01	5	2	1	21	19	28	22	17	11	19	36	18	10	20	2	14	35	36	21	12	30	29	28	24	18	18	13	13	13	29	6	18	32	18	27	23	10	17	21	9	40	8	1	8	22
			1	V009511	13	8	8	13	10	6	23	5	23	34	32	1	23	5	25	14	37	17	30	19	21	20	3	1	12	14	33	17	18	16	23	29	2	18	27	23	10	17	21	9	40	8	1	8	22
			2	V009511	13	8	8	13	10	6	23	5	23	34	32	1	23	5	25	14	37	17	30	19	21	20	3	1	12	14	33	17	18	16	23	31	3	8	1	1	1	23	29	18	35	11	7	4	1
			1	106-D-10-20	5	2	1	21	19	28	22	17	11	19	36	18	10	20	25	14	37	17	30	19	21	20	3	1	12	14	33	17	18	16	23	31	3	8	1	1	1	23	29	18	35	11	7	4	1
			2	106-D-10-20	13	8	8	13	10	6	23	5	23	34	32	1	23	5	25	14	37	17	30	19	21	20	3	1	12	14	33	17	18	16	23	29	2	18	27	23	10	17	21	9	40	8	1	8	22
			1	109-D-10-30	21	1	9	18	4	19	19	21	15	10	44	2	24	29	6	1	2	8	4	6	4	7	1	4	16	9	9	11	4	2	33	13	31	21	9	29	20	29	21	9	40	8	1	8	22
			2	109-D-10-30	13	8	8	13	10	6	23	5	23	34	32	1	23	5	25	12	3	6	30	19	21	21	26	10	4	33	31	16	11	1	2	28	3	8	1	1	1	23	29	18	35	11	7	4	1
			1	36-D-06-14	5	2	1	21	19	28	22	17	11	19	36	18	10	20	2	14	35	36	21	12	30	30	26	10	4	33	31	16	11	1	2	28	3	8	1	1	1	23	29	18	35	11	7	4	1
			2	36-D-06-14	7	11	14	20	15	10	1	14	21	5	41	13	5	18	2	14	35	36	21	12	30	30	26	10	4	33	31	16	11	1	2	28	3	8	1	1	1	23	29	18	35	11	7	4	1
			1	37-M-06-03	21	1	9	18	4	19	19	21	15	10	44	2	24	29	6	1	2	8	4	6	4	7	1	4	16	9	9	11	3	16	23	29	2	18	27	23	10	17	20	15	34	21	3	20	20
			2	37-M-06-03	21	1	9	18	4	19	19	21	15	10	44	2	23	5	25	14	37	17	30	19	21	20	3	1	12	14	33	17	18	16	23	29	2	18	27	23	10	17	20	15	34	21	3	20	20
			1	39-M-06-04	21	1	9	18	4	19	19	21	15	10	44	2	24	29	6	1	2	8	4	6	4	7	1	4	16	9	9	11	3	16	23	29	2	18	27	23	10	17	20	15	34	21	3	20	20
			2	39-M-06-04	21	1	9	18	4	19	19	21	15	10	44	2	23	5	25	14	37	17	30	19	21	20	3	1	12	14	33	17	18	16	23	29	2	18	27	23	10	17	20	15	34	21	3	20	20
			1	40-D-07-28	5	2	1	21	19	28	22	17	11	19	36	18	10	20	2	14	35	36	21	12	30	30	26	10	4	33	31	16	11	1	2	28	3	8	1	1	1	23	30	9	40	8	1	8	22
			2	40-D-07-28	5	2	1	21	19	28	22	17	11	19	36	18	10	20	2	14	35	36	21	12	30	30	26	10	4	33	31	16	11	1	2	28	3	8	1	1	1	23	30	9	40	8	1	8	22
			1	55-D-08-10	13	8	8	13	10	6	23	5	23	34	32	1	23	5	25	14	37	17	30	19	21	20	3	1	12	14	33	17	14	1	2	28	3	8	1	1	1	23	29	18	35	11	7	4	1
			2	55-D-08-10	13	8	8	13	10	6	23	5	23	34	32	1	23	5	25	14	37	17	30	19	23	30	26	10	4	33	31	16	11	1	2	28	3	8	1	1	1	23	30	9	40	8	1	8	22
			1	80-M-09-17	5	2	1	21	19	28	22	17	11	19	36	18	23	5	25	14	37	17	30	19	21	20	3	1	12	14	33	17	18	16	23	29	2	18	27	23	10	17	21	9	40	8	1	8	22
			2	80-M-09-17	13	8	8	13	10	6	23	5	23	34	32	1	23	5	25	14	37	17	30	19	21	20	3	1	12	14	33	17	18	16	23	31	3	8	1	1	1	23	29	18	35	11	7	4	1
			1	D-08-20	13	8	8	13	10	6	23	5	23	34	32	1	23	5	25	14	37	17	30	19	21	20	3	1	12	14	33	17	18	16	23	29	2	18	27	23	1	23	29	18	35	11	7	4	1
			2	D-08-20	13	8	8	13	10	6	23	5	23	34	32	1	23	5	25	14	37	17	30	19	21	20	3	1	12	14	33	17	18	16	23	29	2	18	27	23	10	17	20	15	34	21	3	20	20
			1	M-05-07	21	1	9	18	4	19	19	21	15	10	44	2	23	5	25	14	35	36	21	12	30	30	26	9	12	14	33	17	18	16	23	29	2	18	27	23	10	17	20	15	34	21	3	20	20
			2	M-05-07	21	1	9	18	4	19	19	21	15	12	36	18	10	20	2	14	37	17	30	19	21	20	3	1	12	14	33	17	18	16	23	31	3	8	1	1	1	23	29	18	35	11	7	4	1
			1	81-M-09-05	5	2	1	21	19	28	22	17	11	19	36	18	10	20	2	14	35	36	21	12	30	29	28	24	18	18	13	13	13	29	6	18	32	18	27	23	10	17	21	9	40	8	1	8	22
			2	81-M-09-05	5	2	1	21	19	28	22	17	11	19	36	18	10	20	2	14	35	36	21	12	30	30	26	10	4	33	31	16	11	1	2	28	3	8	1	1	1	23	29	18	36	21	3	20	20
2006-2014			1	103-D-11-17	5	2	1	21	19	28	22	17	11	19	36	18	10	20	2	14	35	36	21	12	30	30	26	10	4	33	31	16	11	1	2	28	3	8	1	1	1	23	29	18	35	11	7	4	1
			2	103-D-11-17	13	8	8	13	10	6	23	5	23	34	32	1	23	5	25	14	37	17	30	19	21	20	3	1	12	14	33	17	18	16	23	29	2	18	27	23	10	17	20	15	34	21	3	20	20
			1	112-D-10-29	5	2	1	21	19	28	22	17	11	19	36	18	10	20	3	1	3	6	30	19	21	20	3	1	12	14	33	16	11	1	2	28	3	8	1	1	1	23	29	18	35	11	7	4	1
			2	112-D-10-29	13	8	8	13	10	6	23	5	23	33	36	18	10	20	25	14	37	17	30	19	21	20	3	1	12	14	33	17	18	16	23	29	2	18	27	23	10	17	21	9	40	8	1	8	22
			1	45-D-07-24	5	2	1	21	19	28	22	17	11	19	36	18	10	20	2	14	35	36	21	12	30	31	3	1	12	14	33	17	18	16	23	29	2	18	27	23	10	17	20	15	34	21	3	20	20
			2	45-D-07-24	13	8	8	13	10	6	23	5	23	34	32	1	23	5	25	14	36	6	30	19	21	20	3	1	12	14	33	22	1	19	5	2	21	25	23	27	22	8	1	15	34	21	1	20	20
			1	48-D-08-21	5	2	1	21	19	28	22	17	11	19	36	18	10	20	2	14	35	36	21	12	30	30	26	10	4	33	31	16	11	1	2	28	3	8	1	1	1	23	29	18	35	11	7	4	1
			2	48-D-08-21	7	11	14	20	15	10	1	14	21	5	41	13	5	18	2	14	35	36	21	12	30	30	26	10	4	33	31	16	11	1	2	28	3	8	1	1	1	23	29	18	36	21	3	20	20
			1	51-D-07-09	5	2	1	21	19	28	22	17	11	19	36	18	10	20	2	14	35	36	21	12	30	30	26	10	4	33	31	16	11	1	2	28	3	8	1	1	1	23	29	18	35	11	7	4	1
			2	51-D-07-09	21	1	8	13	10	6	23	5	23	34	32	1	23	5	25	14	36	6	30	19	21	20	3	1	12	14	33	22	1	19	5	2	21	25	23	27	22	8	1	15	34	21	3	20	20
			1	52-D-07-17	5	2	1	21	19	28	22	17	11	19	36	18	10	15	6	1	2	8	4	6	4	7	1	4	16	9	8	16	11	1	2	28	3	8	1	1	1	23	29	18	35	11	7	4	1
			2	52-D-07-17	13	8	8	13	10	6	23	5	23	34	32	1	23	5	25	14	37	17	30	19	21	20	3	1	12	14	33	17	18	16	23	29	2	18	27	23	1	23	29	18	35	11	7	4	1
			1	53-D-08-08	5	2	1	21	19	28	22	17	11	19	36	18	10	20	2	14	35	36	21	12	30	30	26	10	4	33	31	16	11	1	2	28	3	8	1	1	1	23	29	18	35	11	7	4	1
			2	53-D-08-08	13	8	8	13	10	6	23	5	23	34	32	1	23	5	25	14	37	17	30	19	21	20	3	1	12	14	33	22	1	19	5	2	21	25	23	27	22	8	1	15	34	21	3	20	20
			1	54-M-07-06	13	8	8	13	10	6	23	5	23	34	32	1	23	5	25	14	37	17	30	19	21	20	3	1	12	14	33	17	18	16	23	29	2	18	27	23	10	17	20	15	34	21	3	20	20
			2	54-M-07-06	13	8	8	13	10	6	23	5	23	34	32	1	23	5	25	14	37	17	30	19	21	20	3	1	12	14	33	17	18	16	23	29	2	18	27	23	10	17	20	15	34	21	3	20	20
			1	56-D-07-16	5	2	1	21	19	28	22	17	11	19	36	18	10	20	2	14	35	36	21	12	30	30	26	10	4	33	31	16	11	1	2	28	3	8	1	1	1	23	30	9	40	8	1	8	22
			2	56-D-07-16	13	8	8	13	10	6	23	5	23	34	32	1	23	5	25	14	37	17	30	19	21	20	3	1	12	14	33	17	18	16	23	29	2	18	27	23	10	17	20	15	34	21	3	20	20
			1	D-08-19	5	2	1	21	19	28	22	17	11	19	36	18	10	20	2	14	35	36	21	12	30	30	26	10	4	33	31	16	11	1	2	28	3	8	1	1	1	23	29	18	35	11	7	4	1
			2	D-08-19	21	1	9	18	4	19	20	5	23	34	32	1	23	5	25	14	37	17	30	19	21	20	3	1	12	14	33	17	18	16	23	29	2	18	27	23	1	23	29	18	35	11	7	4	1
			1	102-G34-10	13	8	8	13	10	6	23	5	23	34	32	1	23	5	25	14	37	17	30	19	21	20	3	1	12	14	33	17	18	16	23	29	2	18	27	23	10	17	21	9	40	8	1	8	22
			2	102-G34-10	13	8	8	13	10	6	23	5	23	34	32	1	23	5	25	14	37	17	30	19	21	20	3	1	12	14	33	17	18	16	23	29	2	18	27	23	10	17	21	9	40	8	1	8	22
			1	111-G110-11	5	2	1	21	19	28	22	17	11	19	36	18	10	20	2	14	35	36	21	12	30	30	26	10	4	33	31	16	11	1	2	28	3	8	1	1	1	23	29	18	35	11	7	4	1
			2	111-G110-11	5	2	1	21	19	28	22	17	11	19	36	18	10	20	25	14	37	17	30	19	21	20	3	1	12	14	33	17	18	16	23	29	2	18	27	23	10	17	21	9	40	8	1	8	22
			1	61-G97-13	5	2	1	21	19	28	22	17	11	19	36	18	4	5	25	14	37	17	30	19	21	20	3	1	12	14	33	17	18	16	23	29	2	18	27	23	10	17	21	9	40	8	1	7	1
			2	61-G97-13	13	8	8	13	10	6	23	5	23	34	32	1	23	5	25	14	37	17	30	19	21	20	3	1	12	14	33	18	11	1	2	28	3	8	1	1	1	23	29	18	35	11	7	4	1
			1	62-G174-13	7	11	14	20	15	6	23	5	23	34	32	1	23	5	25	14	36	6	29	6	4	7	1	4	16	9	8	16	11	1	2	28	3	8	1	1	1	23	29	18	35	11	7	4	1
			2	62-G174-13	21	1	8	13	10	6	23	5	23	34	32	1	23	5	25	14	37	17	30	19	21	20	3	1	12	14	33	17	18	16	23	31	3	8	1	1	1	23	29	18	35	11	7	4	1
			1	68-D-10-68	5	2	1	21	19	28	22	17	11	19	36	18	10	20	2	14	35	17	30	19	21	20	3	1	12	14	33	17	18	16	23	29	2	18	27	23	10	17	20	15	34	20	7	4	1
			2	68-D-10-68	13	8	8	13	10	6	23	5	23	34	32	1	23	5	25	14	37	17	30	19	21	20	3	1	12	14	33	17	18	16	23	29	2	18	27	23	10	17	20	15	34	21	3	20	20
			1	69-D-10-15	21	1	9	18	4	19	19	21	15	10	44	2	24	29	6	1	2	8	4	6	4	7	1	4	16	9	8	16	11	1	2	28	3	8	1	1	1	23	29	18	35	11	7	4	1
			2	69-D-10-15	21	1	9	18	4	19	19	21	15	10	44	2	24	29	6	1	2	8	4	6	4	7	1	4	16	9	8	16	11	1	2	28	3	8	1	1	1	23	29	18	35	11	7	4	1
			1	108-D-10-44	21	1	9	18	4	19	19	21	15	10	44	2	24	29	6	1	2	8	4	6	4	7	1	4	16	9	8	16	11	1	2	28	3	8	1	1	1	23	29	18	35	11	7	4	1
			2	108-D-10-44	13	8	8	13	10	6	23	5	23	34	32	13	5	18	2	13	2	8	4	6	4	7	1	4	16	9	8	16	11	1	2	28	3	8	1	1	1	23	29	18	35	11	7	4	1
			1	70-D-10-23	21	1	9	18	4	19	19	21	15	10	44	2	24	29	6	1	2	8	4	6	4	7	1	4	16	9	8	16	11	1	2	28	3	8	1	1	1	23	29	18	35	11	7	4	1
			2	70-D-10-23	21	1	9	18	4	19	19	21	15	10	44	2	24	29	6	1	2	8	4	6	4	7	1	4	16	9	8	16	11	1	2	28	3	8	1	1	1	23	29	18	35	11	7	4	1
			1	92-G58-15	21	1	9	18	4	19	19	21	15	10	44	2	24	29	6	1	2	8	4	6	4	7	1	4	16	9	8	16	11	1	2	28	3	8	1	1	1	23	29	18	35	11	7	4	1
			2	92-G58-15	21	1	9	18	4	19	19	21	15	10	44	2	24	29	6	1	2	8	4	6	4	7	1	4	16	9	8	16	11	1	2	28	3	8	1	1	1	23	29	18	35	11	7	4	1
			1	73-D-11-22	13	8	8	13	10	6	23	5	23	34	32	1	23	5	25	14	37	17	30	19	21	20	3	1	12	14	33	17	18	16	23	29	2	18	27	23	10	17	20	15	34	21	3	20	20
			2	73-D-11-22	13	8	8	13	10	6	23	5	23	34	32	1	23	5	25	14	37	17	30	19	21	20	3	1	12	14	33	18	11	1	2	28	3	8	1	1	1	23	29	18	35	11	7	4	1
			1	77-G87-12	21	1	9	18	4	19	19	21	15	11	36	18	10	20	2	14	35	36	21	12	30	30	25	1	12	14	33	17	18	16	23	29	2	18	27	23	10	17	20	15	34	21	3	20	20
			2	77-G87-12	13	8	8	13	10	6	23	5	23	34	32	1	23	5	25	14	37	17	30	19	21	20	3	1	12	14	33	17	18	16	23	29	2	18	27	23	1	23	29	18	35	11	7	4	1
			1	78-D-11-58	5	2	1	21	19	28	22	17	X	34	32	1	23	5	25	14	37	17	30	19	21	20	3	1	12	14	33	17	18	16	23	31	3	8	1	1	1	23	29	18	35	11	7	4	1
			2	78-D-11-58	13	8	8	13	10	6	23	5	23	34	32	1	23	5	25	14	37	17	30	19	22	7	1	4	16	9	8	16	11	1	2	28	3	8	1	1	1	23	29	18	35	11	7	4	1
			1	86-G126-13	21	1	9	18	4	19	19	21	15	10	44	2	23	5	25	12	3	6	30	19	21	21	26	10	4	33	31	16	11	1	2	28	3	8	1	1	1	23	29	18	35	11	7	4	1
			2	86-G126-13	7	11	14	20	15	6	23	5	23	34	32	1	23	5	25	14	37	17	30	19	21	20	3	1	12	14	33	17	18	16	23	29	2	18	27	23	10	17	20	15	34	21	3	20	20
			1	88-G50-12	7	11	14	20	15	10	1	14	21	5	41	13	5	18	2	14	35	36	21	12	30	30	26	10	4	33	31	16	11	1	2	28	3	8	1	1	1	23	29	18	35	11	7	4	1
			2	88-G50-12	13	8	8	13	10	6	23	5	23	34	32	1	23	5	25	14	37	17	30	19	21	20	3	1	12	14	33	17	18	16	23	29	2	18	27	23	10	17	21	9	39	11	7	4	1
			1	91-G24-14	13	8	1	20	15	10	1	14	21	5	41	13	5	18	2	14	35	36	21	12	30	30	26	10	4	33	31	16	11	1	2	28	3	8	1	1	1	23	29	18	35	11	7	4	1
			2	91-G24-14	13	8	8	13	10	6	23	5	23	34	32	1	23	5	25	14	37	17	30	19	21	20	3	1	12	14	33	17	18	16	23	31	3	8	1	1	1	23	29	18	35	11	7	4	1
			1	95-G175-13	5	2	1	21	19	28	22	17	11	19	36	18	10	20	2	14	35	36	21	12	30	30	26	10	4	33	31	17	18	16	23	29	2	18	27	23	10	17	21	9	39	11	7	4	1
			2	95-G175-13	5	2	1	21	19	28	22	16	23	34	32	1	23	5	25	14	37	17	30	19	21	20	3	1	12	14	33	17	18	16	23	29	2	18	27	23	10	17	20	15	34	21	3	20	20
			1	97-G32-12	13	8	8	13	10	6	23	5	23	34	32	1	23	5	25	14	37	17	30	19	21	20	3	1	12	14	33	18	11	1	2	28	3	8	1	1	1	23	29	18	35	11	7	4	1
			2	97-G32-12	13	8	8	13	10	6	23	5	23	34	32	1	23	5	25	14	37	17	30	19	21	20	3	1	12	14	33	17	18	16	23	31	3	8	1	1	1	23	29	18	35	11	7	4	1
			1	D-10-50	13	8	8	13	10	6	23	5	23	34	32	1	23	5	25	14	37	17	30	19	21	20	3	1	12	14	33	17	18	16	23	29	2	18	27	23	10	17	20	15	34	21	3	20	20
			2	D-10-50	13	8	8	13	10	6	23	5	23	34	32	1	23	5	25	14	37	17	30	19	21	20	3	1	12	14	33	17	18	16	23	31	3	8	1	1	1	25	1	15	34	21	3	20	20
Founder haplotype assignment:
Female founder			1	F_1	5	2	1	21	19	28	22	17	11	19	36	18	10	20	2	14	35	36	21	12	30	30	26	10	4	33	31	16	11	1	2	28	3	8	1	1	1	23	29	18	35	11	7	4	1
			2	F_2	24	6	11	7	21	20	28	29	31	1	1	11	8	2	4	25	7	5	19	8	17	3	20	26	28	31	1	5	21	9	13	34	10	1	18	5	9	1	18	22	26	14	3	1	34
First male founder			1	M1_1	21	1	9	18	4	19	19	21	15	10	44	2	24	29	6	1	2	8	4	6	4	7	1	4	16	9	9	11	4	2	33	13	31	21	9	29	20	26	12	26	42	5	25	29	22
			2	M1_2	7	11	14	20	15	10	1	14	21	5	41	13	5	19	1	20	11	8	4	6	4	10	28	24	18	18	13	13	13	29	6	18	32	18	27	23	10	17	21	9	40	8	1	8	22
Second male founder			1	M2_1	13	8	8	13	10	6	23	5	23	34	32	1	23	5	25	14	37	17	30	19	21	20	3	1	12	14	33	17	18	16	23	29	2	18	27	23	10	17	21	9	40	8	1	8	22
			2	M2_2	13	8	8	13	10	6	23	5	23	34	32	1	23	5	25	14	36	6	30	19	21	20	3	1	12	14	33	22	1	19	5	2	21	25	23	27	22	8	1	15	34	21	3	20	20
[truncated: 36 more columns]

## Sheet: chr8_1Mb
				window:	0	1	2	3	4	5	6	7	8	9	10	11	12	13	14	15	16	17	18	19	20	21	22	23	24	25	26	27	28	29	30	31	32	33	34	35	36	37	38	39	40	41	42	43	44
Female founder			1	D-85-01	5	12	14	2	24	28	1	2	1	2	1	1	1	1	1	1	1	1	2	28	9	4	10	20	33	6	24	29	7	10	6	19	26	3	13	29	17	7	31	11	19	17	2	23	19
			2	D-85-01	16	19	12	8	22	9	29	22	6	33	13	34	11	24	27	7	31	11	18	15	14	16	4	17	36	9	34	33	22	22	27	15	31	15	7	17	28	22	10	33	21	8	12	12	10
1983-1993	First male founder	F1 offspring	1	D-84-03	5	12	14	2	24	28	1	2	1	2	1	1	1	1	1	1	1	1	2	28	9	4	10	20	33	6	24	29	7	10	6	19	26	3	13	29	17	7	31	11	19	17	2	23	19
			2	D-84-03	15	10	40	3	23	22	22	4	26	34	8	13	4	10	19	23	13	14	20	37	3	19	27	2	10	17	36	17	5	17	8	37	40	17	16	10	16	4	24	25	3	6	3	2	31
			1	D-85-02	5	12	14	2	24	28	1	2	1	2	1	1	1	1	1	1	1	1	2	28	9	4	10	20	33	6	24	29	7	10	6	19	26	3	13	29	17	7	31	11	19	17	2	23	19
			2	D-85-02	15	10	40	3	23	22	22	4	26	34	8	13	4	10	19	23	13	14	20	37	2	4	10	21	18	15	6	11	24	21	4	33	26	3	13	29	17	7	32	19	24	28	23	15	6
			1	3-D-86-01	5	12	14	2	24	28	1	2	1	2	1	1	1	1	1	1	1	1	1	3	5	4	10	21	18	15	6	11	24	21	4	33	26	3	13	29	17	7	32	19	24	28	23	15	6
			2	3-D-86-01	16	19	12	8	22	9	29	22	6	33	13	34	11	24	27	7	31	11	18	15	14	16	4	17	36	9	34	33	22	22	27	15	31	15	7	17	28	22	10	33	21	8	12	12	10
		F2 offspring	1	4-D-89-01	5	12	14	2	24	28	1	2	1	2	1	1	1	1	1	1	1	1	1	3	5	4	10	21	18	15	6	11	24	21	4	33	26	3	13	29	17	7	32	19	24	28	23	2	31
			2	4-D-89-01	5	12	14	2	24	28	1	2	1	2	1	1	1	1	1	1	1	1	2	28	9	4	10	20	33	6	24	29	7	10	6	19	26	3	13	29	17	7	31	11	19	17	2	23	19
			1	5-D-91-01	5	12	14	2	24	28	1	2	1	2	1	1	1	1	1	1	1	1	1	3	5	4	10	21	18	15	6	11	24	21	4	33	26	3	13	29	17	7	32	19	24	28	23	2	31
			2	5-D-91-01	5	12	14	2	24	28	1	2	1	2	1	1	1	1	1	1	1	1	2	28	9	4	10	20	33	6	24	29	7	10	6	19	26	3	13	29	17	7	31	11	19	17	2	23	19
			1	16-D-89-03	5	12	14	2	24	28	1	2	1	2	1	1	1	1	1	1	1	1	1	8	14	16	4	17	36	9	34	33	22	22	27	15	32	3	13	29	17	7	31	11	19	17	2	23	19
			2	16-D-89-03	15	10	40	3	23	22	22	4	26	34	8	13	4	10	19	23	13	14	20	37	3	19	27	2	10	17	36	17	5	17	8	37	40	17	16	10	16	4	24	25	3	6	3	2	31
			1	17-D-92-05	5	12	14	2	24	28	1	2	1	2	1	1	1	1	1	1	1	1	1	3	5	4	10	21	18	15	6	11	24	21	4	33	26	3	13	29	17	7	32	19	24	28	23	2	31
			2	17-D-92-05	15	10	40	3	23	22	22	4	26	34	8	13	4	10	19	23	13	14	20	37	3	19	27	2	10	17	36	17	5	17	8	37	40	17	16	10	16	4	24	25	3	6	3	2	31
			1	30-D-93-02	5	12	14	2	24	28	1	2	1	2	1	1	1	1	1	1	1	1	1	3	5	4	10	21	18	15	6	11	24	21	4	33	26	3	13	29	17	7	32	19	24	28	23	15	6
			2	30-D-93-02	5	12	14	2	24	28	1	2	1	2	1	1	1	1	1	1	1	1	2	28	9	4	10	20	33	6	24	29	7	10	6	19	26	3	13	31	16	4	24	25	3	6	3	2	31
		F3 offspring	1	6-M-98-02	5	12	14	2	24	28	1	2	1	2	1	1	1	1	1	1	1	1	2	28	9	4	10	20	33	6	24	29	7	10	6	19	26	3	13	29	17	7	31	11	19	17	2	23	19
			2	6-M-98-02	15	10	40	3	23	22	22	4	26	34	8	13	4	10	19	23	13	14	20	37	3	19	27	2	10	17	36	17	5	17	8	37	40	17	16	10	16	4	24	25	3	6	3	2	31
			1	31-D-93-03	5	12	14	2	24	28	1	2	1	2	1	1	1	1	1	1	1	1	2	28	9	4	10	20	33	6	24	29	7	10	6	19	26	3	13	29	17	7	31	11	19	17	2	23	19
			2	31-D-93-03	16	19	12	8	22	9	29	22	6	33	13	34	11	24	27	7	31	11	18	15	14	16	4	17	36	9	34	33	22	22	27	15	32	3	13	29	17	7	31	11	19	17	2	23	19
			1	19-D-94-01	15	10	40	3	23	22	22	4	26	34	8	13	4	10	19	23	13	14	20	37	3	19	27	2	10	17	36	17	5	17	8	37	40	17	16	10	16	4	24	25	3	6	3	2	31
			2	19-D-94-01	16	19	12	8	22	9	29	22	6	33	13	34	11	24	27	7	31	11	18	15	14	16	4	17	36	9	34	33	22	22	27	15	32	3	13	29	17	7	31	11	19	17	2	23	19
			1	57-D-92-06	5	12	14	2	24	28	1	2	1	2	1	1	1	1	1	1	1	1	1	3	5	4	10	21	18	15	6	11	24	21	4	33	26	3	13	29	17	7	32	19	24	28	23	2	31
			2	57-D-92-06	5	12	14	2	24	28	1	2	1	2	1	1	1	1	1	1	1	1	2	28	9	4	10	20	33	6	24	29	7	10	6	19	26	3	13	29	17	7	31	11	19	17	2	23	19
	Second male founder	F1 offspring	1	94-D-92-01	8	1	3	26	30	4	9	30	1	4	29	24	8	30	24	13	4	11	19	26	28	10	18	14	18	15	6	11	24	23	8	37	40	17	16	10	16	4	24	25	3	6	3	2	35
			2	94-D-92-01	16	19	12	8	22	9	29	22	6	33	13	34	11	24	27	7	31	11	18	15	14	16	4	17	36	9	34	33	22	22	27	15	31	15	7	17	28	22	10	33	21	8	12	12	10
			1	59-D-96-01	8	1	3	26	30	4	9	30	1	4	29	24	8	30	24	13	4	11	19	26	28	10	18	14	18	15	6	11	24	23	8	37	40	17	16	10	16	4	24	25	3	6	3	2	35
			2	59-D-96-01	16	19	12	8	22	9	29	22	6	33	13	34	11	24	27	7	31	11	18	15	14	16	4	17	36	9	34	33	22	22	27	15	31	15	7	17	28	22	10	33	21	8	12	12	10
			1	43-D-92-02	5	12	14	2	24	28	1	2	1	2	1	1	1	1	1	1	1	1	1	3	5	4	10	21	18	15	6	11	24	21	4	33	26	3	13	29	17	7	32	19	24	28	23	15	6
			2	43-D-92-02	8	1	3	26	30	4	9	30	1	4	29	24	8	30	24	13	4	11	19	26	28	10	18	14	18	15	6	11	24	21	5	10	24	22	33	32	6	22	9	27	12	5	32	30	16
			1	D-93-01	16	19	12	8	22	9	29	22	6	33	13	34	11	24	27	7	31	11	18	15	14	16	4	17	35	15	6	11	24	21	4	33	26	3	13	29	17	7	32	19	24	28	23	15	6
			2	D-93-01	3	23	30	24	8	29	19	13	36	6	8	15	33	13	30	14	9	23	17	17	28	10	18	14	18	15	6	11	24	21	5	10	24	22	33	32	6	22	9	27	12	5	32	30	16
			1	8492	5	12	14	2	24	28	1	2	1	2	1	1	1	1	1	1	1	1	1	3	5	4	10	21	18	15	6	11	24	21	4	33	26	3	13	29	17	7	32	19	24	28	23	14	10
			2	8492	3	23	30	24	8	29	19	13	36	6	8	15	33	13	30	14	9	23	17	17	28	10	18	14	18	15	6	11	24	21	5	10	24	22	33	32	6	22	9	27	12	5	32	30	16
			1	22-D-99-02	5	12	14	2	24	28	1	2	1	2	1	1	1	1	1	1	1	1	1	3	5	4	10	21	18	15	6	11	24	21	4	33	26	3	13	29	17	7	32	19	24	28	23	15	6
			2	22-D-99-02	3	23	30	24	8	29	19	13	36	6	8	15	33	13	30	14	9	23	17	17	28	10	18	14	18	15	6	11	24	21	5	10	24	22	33	32	6	22	9	27	12	5	32	30	16
			1	11-M-98-03	5	12	14	2	24	28	1	2	1	2	1	1	1	1	1	1	1	1	1	3	5	4	10	21	18	15	6	11	24	21	4	33	26	3	13	29	17	7	32	19	24	28	23	15	6
			2	11-M-98-03	3	23	30	24	8	29	19	13	36	6	8	15	33	13	30	14	9	23	17	17	28	10	18	14	18	15	6	11	24	21	5	10	24	22	33	32	6	22	9	27	12	5	32	30	16
1994-2005			1	Varg0109	5	12	14	2	24	28	1	2	1	2	1	1	1	1	1	1	1	1	1	3	5	4	10	21	18	15	6	11	24	21	4	33	26	3	13	29	17	7	32	19	24	28	23	15	6
			2	Varg0109	5	12	14	2	24	28	1	2	1	2	1	1	1	1	1	1	1	1	2	28	9	4	10	20	33	6	24	29	7	10	6	19	26	3	13	29	17	7	31	11	19	17	2	23	19
			1	105-D-00-15	5	12	14	2	24	28	1	2	1	2	1	1	1	1	1	1	1	1	2	28	9	4	10	20	33	6	24	29	7	10	6	19	26	3	13	29	17	7	31	11	19	17	2	23	19
			2	105-D-00-15	16	19	12	8	22	9	29	22	6	33	13	34	11	24	27	7	31	11	18	15	14	16	4	17	36	10	6	11	24	21	4	33	26	2	33	32	6	22	9	27	12	5	32	30	16
			1	12-M-01-04	5	12	14	2	24	28	1	2	1	2	1	1	1	1	1	1	1	1	1	3	5	4	10	21	18	15	6	11	24	21	4	33	26	3	13	29	17	7	32	19	24	28	23	2	31
			2	12-M-01-04	5	12	14	2	24	28	1	2	1	2	1	1	1	1	1	1	1	1	1	3	9	4	10	21	18	15	6	11	24	21	4	33	26	3	13	29	17	7	32	19	24	28	23	15	6
			1	14-M-00-09	16	19	12	8	22	9	29	22	6	33	13	34	11	24	27	7	31	11	18	15	14	16	4	17	36	9	34	33	22	22	27	15	32	3	13	29	17	7	31	11	19	17	2	23	19
			2	14-M-00-09	16	19	12	8	22	9	29	22	6	33	13	34	11	24	27	7	31	11	18	15	14	16	4	17	36	10	6	11	24	21	4	33	26	3	13	29	17	7	32	19	24	28	23	15	6
			1	15-M-01-10	3	23	30	24	8	29	19	13	1	2	1	1	1	1	1	1	1	1	1	3	5	4	10	21	18	15	6	11	24	21	4	33	26	3	13	29	17	7	32	19	24	28	23	15	6
			2	15-M-01-10	16	19	12	8	22	9	29	22	6	33	13	34	11	24	27	7	31	11	18	15	14	16	4	17	36	10	6	11	24	21	4	33	26	2	33	32	6	22	9	27	12	5	32	30	16
			1	28-M-03-07	5	12	14	2	24	28	1	2	1	2	1	1	1	1	1	1	1	1	2	28	9	4	10	20	33	6	24	29	7	10	6	19	26	3	13	29	17	7	31	11	19	17	2	23	19
			2	28-M-03-07	3	23	30	24	8	29	19	13	1	2	1	1	1	1	1	1	1	1	2	28	9	4	10	20	33	6	24	29	7	10	6	19	26	3	13	29	17	7	31	11	19	17	2	23	19
			1	75-G9-05	5	12	14	2	24	28	1	2	1	2	1	1	1	1	1	1	1	1	2	28	9	4	10	20	33	6	24	29	7	10	6	19	26	3	13	29	17	7	31	11	19	17	2	23	19
			2	75-G9-05	8	1	3	26	30	4	9	30	1	4	29	24	8	30	24	13	4	11	19	26	28	10	18	14	18	15	6	11	24	21	4	33	26	3	13	29	17	7	32	19	24	28	23	15	6
			1	D-01-18	16	19	12	8	22	9	29	22	6	33	13	34	11	24	27	7	31	11	18	15	14	16	4	17	36	9	34	33	22	22	27	15	32	3	13	29	17	7	31	11	19	17	2	23	19
			2	D-01-18	3	23	30	24	8	29	19	13	36	6	8	15	33	13	30	14	9	23	17	17	28	10	18	14	18	15	6	11	24	21	5	10	24	22	33	32	6	22	9	27	12	5	32	30	16
			1	110-M-01-06	5	12	14	2	24	28	1	2	1	2	1	1	1	1	1	1	1	1	1	3	5	4	10	21	18	15	6	11	24	21	4	33	26	3	13	29	17	7	32	19	24	28	23	2	31
			2	110-M-01-06	5	12	14	2	24	28	1	2	1	2	1	1	1	1	1	1	1	1	2	28	9	4	10	20	33	6	25	17	5	17	8	37	40	17	16	10	16	4	24	25	3	6	3	2	31
			1	13-M-98-08	15	10	40	3	23	22	22	4	26	34	8	13	4	10	19	23	13	14	20	37	3	19	27	2	10	17	36	17	5	17	8	37	40	17	16	10	16	4	24	25	3	6	3	2	31
			2	13-M-98-08	3	23	30	24	8	29	19	13	36	6	8	15	33	13	30	14	9	23	17	17	28	10	18	14	18	15	6	11	24	21	5	10	24	22	33	32	6	22	9	27	12	5	32	30	16
			1	25-M-03-06	5	12	14	2	24	28	1	2	1	2	1	1	1	1	1	1	1	1	2	28	9	4	10	20	33	6	24	29	7	10	6	19	26	3	13	29	17	7	31	11	19	17	2	23	19
			2	25-M-03-06	8	1	3	26	30	4	9	30	1	4	29	24	8	30	24	13	4	11	19	26	28	10	18	14	18	15	6	11	24	23	8	37	40	17	16	10	16	4	24	25	3	6	3	2	35
			1	35-D-05-23	5	12	14	2	24	28	1	2	1	2	1	1	1	1	1	1	1	1	1	3	5	4	10	21	18	15	6	11	24	21	4	33	26	3	13	29	17	7	32	19	24	28	23	2	31
			2	35-D-05-23	3	23	30	24	8	29	19	13	36	6	8	15	32	1	1	1	1	1	2	28	9	4	10	20	33	6	24	29	7	10	6	19	26	3	13	29	17	7	31	11	19	17	2	23	19
			1	38-D-06-16	5	12	14	2	24	28	1	2	1	2	1	1	1	1	1	1	1	1	1	3	5	4	10	21	18	15	6	11	24	21	4	33	26	3	13	29	17	7	32	19	24	28	23	15	6
			2	38-D-06-16	5	12	14	2	24	28	1	2	1	2	1	1	1	1	1	1	1	1	1	3	5	4	10	21	18	15	6	11	24	21	4	33	26	3	13	29	17	7	32	19	24	28	23	2	31
			1	60-M-00-10	16	19	12	8	22	9	29	22	6	33	13	34	11	24	27	7	31	11	18	15	14	16	4	17	36	9	34	33	22	22	27	15	32	3	13	29	17	7	31	11	19	17	2	23	19
			2	60-M-00-10	16	19	12	8	22	9	29	22	6	33	13	34	11	24	27	7	31	11	18	15	14	16	4	17	36	9	34	33	22	22	27	15	32	3	13	29	17	7	31	11	19	17	2	23	19
			1	D-00-12	5	12	14	2	24	28	1	2	1	2	1	1	1	1	1	1	1	1	1	2	28	10	18	14	18	15	6	11	24	21	5	10	24	22	33	32	6	22	9	27	12	5	32	30	16
			2	D-00-12	3	23	30	24	8	29	19	13	36	33	13	34	11	24	27	7	31	11	18	15	14	16	4	17	36	9	34	33	22	22	27	15	32	3	13	29	17	7	31	11	19	17	2	23	19
			1	M-98-01	5	12	14	2	24	28	1	2	1	2	1	1	1	1	1	1	1	1	1	2	28	10	18	14	18	15	6	11	24	21	5	10	24	22	33	32	6	22	9	27	12	5	32	30	16
			2	M-98-01	3	23	30	24	8	29	19	13	36	6	8	15	33	13	30	14	9	23	17	17	28	10	18	14	18	15	6	11	24	21	5	10	24	22	33	32	6	22	9	27	12	5	32	30	16
			1	V009511	5	12	14	2	24	28	1	2	1	2	1	1	1	1	1	1	1	1	2	28	9	4	10	20	33	6	24	29	7	10	6	19	26	3	13	29	17	7	31	11	19	17	2	23	19
			2	V009511	16	19	12	8	22	9	29	22	6	33	13	34	11	24	27	7	31	11	18	15	14	16	4	17	36	9	34	33	22	22	27	15	31	15	7	17	28	22	10	33	21	8	12	12	10
			1	106-D-10-20	5	12	14	2	24	28	1	2	1	2	1	1	1	1	1	1	1	1	2	28	9	4	10	20	33	6	24	29	7	10	6	19	26	3	13	29	17	7	31	11	19	17	2	23	19
			2	106-D-10-20	16	19	12	8	22	9	29	22	6	33	13	34	11	24	27	7	31	11	18	15	14	16	4	17	36	9	34	33	22	22	27	15	31	15	7	17	28	22	10	33	21	8	12	12	10
			1	109-D-10-30	5	12	14	2	24	28	1	2	1	2	1	1	1	1	1	1	1	1	2	28	9	4	10	20	33	6	24	29	7	10	6	19	26	4	33	32	6	22	9	27	12	5	32	30	16
			2	109-D-10-30	3	23	30	24	8	29	19	13	36	6	8	15	33	13	30	14	9	23	17	17	28	10	18	14	18	15	6	11	24	21	5	10	24	22	33	32	6	22	9	27	12	5	32	30	16
			1	36-D-06-14	5	12	14	2	24	28	1	2	1	2	1	1	1	1	1	1	1	1	1	3	5	4	10	21	18	15	6	11	24	21	4	33	26	3	13	29	17	7	32	19	24	28	23	15	6
			2	36-D-06-14	5	12	14	2	24	28	1	2	1	2	1	1	1	1	1	1	1	1	1	3	5	4	10	21	18	15	6	11	24	21	4	33	26	3	13	29	17	7	32	19	24	28	23	15	6
			1	37-M-06-03	5	12	14	2	24	28	1	2	1	2	1	1	1	1	1	1	1	1	1	3	5	4	10	21	18	15	6	11	24	21	4	33	26	3	13	29	17	7	32	19	24	28	23	15	6
			2	37-M-06-03	5	12	12	8	22	9	29	22	6	33	13	34	11	24	27	7	31	11	18	15	14	16	4	17	36	10	6	11	24	21	4	33	26	2	33	32	6	22	9	27	12	5	32	30	16
			1	39-M-06-04	16	19	12	8	22	9	29	22	6	33	13	34	11	24	27	7	31	11	18	15	14	16	4	17	36	10	6	11	24	21	4	33	26	2	33	32	6	22	9	27	12	5	32	30	16
			2	39-M-06-04	3	23	30	24	8	29	19	13	36	6	8	15	33	13	30	14	9	23	17	17	28	10	18	14	18	15	6	11	24	21	4	33	26	3	13	29	17	7	32	19	24	28	23	15	6
			1	40-D-07-28	5	12	14	2	24	28	1	2	1	2	1	1	1	1	1	1	1	1	1	3	5	4	10	21	18	15	6	11	24	21	4	33	26	3	13	29	17	7	32	19	24	28	23	15	6
			2	40-D-07-28	5	12	14	2	24	28	1	2	1	2	1	1	1	1	1	1	1	1	1	3	5	4	10	21	18	15	6	11	24	21	4	33	26	3	13	29	17	7	32	19	24	28	23	15	6
			1	55-D-08-10	5	12	14	2	24	28	1	2	1	2	1	1	1	1	1	1	1	1	1	3	5	4	10	21	18	15	6	11	24	21	4	33	26	3	13	29	17	7	32	19	24	28	23	15	6
			2	55-D-08-10	5	12	14	2	24	28	1	2	1	2	1	1	1	1	1	1	1	1	1	3	5	4	10	21	18	15	6	11	24	21	4	33	26	3	13	29	17	7	32	19	24	28	23	15	6
			1	80-M-09-17	5	12	14	2	24	28	1	2	1	2	1	1	1	1	1	1	1	1	2	28	9	4	10	20	33	6	24	29	7	10	6	19	26	3	13	29	17	7	31	11	19	17	2	23	19
			2	80-M-09-17	8	1	3	26	30	4	29	30	1	4	29	24	8	30	24	7	31	11	18	15	14	16	4	17	36	9	34	33	22	22	27	15	31	15	7	17	28	22	10	33	21	8	12	12	10
			1	D-08-20	5	12	14	2	24	28	1	2	1	2	1	1	1	1	1	1	1	1	2	28	9	4	10	20	33	6	24	29	7	10	6	19	26	3	13	29	17	7	31	11	19	17	2	23	19
			2	D-08-20	16	19	12	8	22	9	29	22	6	33	13	34	11	24	27	7	31	11	18	15	14	16	4	17	36	10	6	11	24	21	4	33	26	2	33	32	6	22	9	27	12	5	32	30	16
			1	M-05-07	16	19	12	8	22	9	29	22	6	33	13	34	11	24	27	7	31	11	18	15	14	16	4	17	36	10	6	11	24	21	4	33	26	2	33	32	6	22	9	27	12	5	32	30	16
			2	M-05-07	3	23	30	24	8	29	19	13	36	6	8	15	33	13	30	14	9	23	17	17	28	10	18	14	18	15	6	11	24	21	5	10	24	22	33	32	6	22	9	27	12	5	32	30	16
			1	81-M-09-05	5	12	14	2	24	28	1	2	1	2	1	1	1	1	1	1	1	1	1	3	5	4	10	21	18	15	6	11	24	21	4	33	26	3	13	29	17	7	32	19	24	28	23	2	31
			2	81-M-09-05	3	23	30	24	8	29	19	13	36	6	8	15	33	13	30	14	9	23	17	17	28	10	18	14	18	15	6	11	24	21	5	10	24	22	33	32	6	22	9	27	12	5	32	30	16
2006-2014			1	103-D-11-17	5	12	14	2	24	28	1	2	1	2	1	1	1	1	1	1	1	1	1	3	5	4	10	21	18	15	6	11	24	21	4	33	26	3	13	29	17	7	32	19	24	28	23	15	6
			2	103-D-11-17	5	12	14	2	24	28	1	2	1	2	1	1	1	1	1	1	1	1	2	28	9	4	10	20	33	6	24	29	7	10	6	19	26	3	13	29	17	7	31	11	19	17	2	23	19
			1	112-D-10-29	8	1	3	26	30	4	9	30	1	4	29	24	8	30	24	13	4	11	19	26	28	10	18	14	18	15	6	11	24	21	4	33	26	3	13	29	17	7	32	19	24	28	23	15	6
			2	112-D-10-29	5	12	14	2	24	28	1	2	1	2	1	2	11	24	27	7	31	11	18	15	14	16	4	17	36	9	34	33	22	22	27	15	31	15	7	17	28	22	10	33	21	8	12	12	10
			1	45-D-07-24	3	23	30	24	8	29	19	13	36	6	8	15	33	13	30	14	9	23	17	17	28	10	18	14	18	15	6	11	24	21	5	10	24	22	33	32	6	22	9	27	12	5	32	30	16
			2	45-D-07-24	3	23	30	24	8	29	19	13	36	6	13	15	33	13	30	14	9	23	17	17	28	10	18	14	18	15	6	11	24	21	5	10	24	22	33	32	6	22	9	27	12	5	32	30	16
			1	48-D-08-21	5	12	14	2	24	28	1	2	1	2	1	1	1	1	1	1	1	1	1	3	5	4	10	21	18	15	6	11	24	21	4	33	26	3	13	29	17	7	32	19	24	28	23	15	6
			2	48-D-08-21	16	19	12	8	22	9	29	22	6	33	13	34	11	24	27	7	31	11	18	15	14	16	4	17	36	9	34	33	22	22	27	15	31	15	7	17	28	22	10	33	21	8	12	12	10
			1	51-D-07-09	5	12	14	2	24	28	1	2	1	2	1	1	1	1	1	1	1	1	1	3	5	4	10	21	18	15	6	11	24	21	4	33	26	2	33	32	6	22	9	27	12	5	32	30	16
			2	51-D-07-09	16	19	12	8	22	9	29	22	6	33	13	34	11	24	27	7	31	11	18	15	14	16	4	17	36	10	6	11	24	21	4	33	26	2	33	32	6	22	9	27	12	5	32	30	16
			1	52-D-07-17	16	19	12	8	22	9	29	22	6	33	13	34	11	24	27	7	31	11	18	15	14	16	4	17	36	10	6	11	24	21	4	33	26	2	33	32	6	22	9	27	12	5	32	30	16
			2	52-D-07-17	3	23	30	24	8	29	19	13	36	6	8	15	33	13	30	14	9	23	17	17	28	10	18	14	18	15	6	11	24	21	5	10	24	22	33	32	6	22	9	27	12	5	32	30	16
			1	53-D-08-08	5	12	14	2	24	28	1	2	1	2	1	1	1	1	1	1	1	1	1	3	5	4	10	21	18	15	6	11	24	21	4	33	26	3	13	29	17	7	32	19	24	28	23	2	31
			2	53-D-08-08	3	23	30	24	8	29	19	13	36	6	8	15	33	13	30	14	9	23	17	17	28	10	18	14	18	15	6	11	24	21	5	10	24	22	33	32	6	22	9	27	12	5	32	30	16
			1	54-M-07-06	5	12	14	2	24	28	1	2	1	2	1	1	1	1	1	1	1	1	1	3	5	4	10	21	18	15	6	11	24	21	4	33	26	3	13	29	17	7	32	19	24	28	23	15	6
			2	54-M-07-06	5	12	14	2	24	28	1	2	1	2	1	1	1	1	1	1	1	1	2	28	9	4	10	20	33	6	24	29	7	10	6	19	26	3	13	29	17	7	31	11	19	17	2	23	19
			1	56-D-07-16	5	12	14	2	24	28	1	2	1	2	1	1	1	1	1	1	1	1	1	3	5	4	10	21	18	15	6	11	24	21	4	33	26	3	13	29	17	7	32	19	24	28	23	15	6
			2	56-D-07-16	5	12	14	2	24	28	1	2	1	2	1	1	1	1	1	1	1	1	1	3	5	4	10	21	18	15	6	11	24	21	4	33	26	3	13	29	17	7	32	19	24	28	23	15	6
			1	D-08-19	5	12	14	2	24	28	1	2	1	2	1	1	1	1	1	1	1	1	1	3	5	4	10	21	18	15	6	11	24	21	4	33	26	3	13	29	17	7	32	19	24	28	23	15	6
			2	D-08-19	3	23	30	24	8	29	19	13	36	6	8	13	4	10	19	23	13	14	20	37	3	19	27	2	10	17	36	17	5	17	8	37	40	17	16	10	16	4	24	25	3	6	3	2	31
			1	102-G34-10	5	12	14	2	24	28	1	2	1	2	1	1	1	1	1	1	1	1	2	28	9	4	10	20	33	6	24	29	7	10	6	19	26	3	13	29	17	7	31	11	19	17	2	23	19
			2	102-G34-10	16	19	12	8	22	9	29	22	6	33	13	34	11	24	27	7	31	11	18	15	14	16	4	17	36	9	34	33	22	22	27	15	31	15	7	15	17	7	31	11	19	17	2	23	19
			1	111-G110-11	5	12	14	2	24	28	1	2	1	2	1	1	1	1	1	1	1	1	2	28	9	4	10	20	33	6	24	29	7	10	6	19	26	3	13	29	17	7	31	11	19	17	2	23	19
			2	111-G110-11	16	19	12	8	22	9	29	22	6	33	13	34	11	24	27	7	31	11	18	15	14	16	4	17	36	9	34	33	22	22	27	15	31	15	7	17	28	22	10	33	21	8	12	12	10
			1	61-G97-13	5	12	14	2	24	28	1	2	1	2	1	1	1	1	1	1	1	1	2	28	9	4	10	20	33	6	24	29	7	10	6	19	26	3	13	29	17	7	31	11	19	17	2	23	19
			2	61-G97-13	8	1	3	26	30	4	9	30	1	4	29	24	8	30	24	7	31	11	18	15	14	16	4	17	36	9	34	33	22	22	27	15	31	15	7	17	28	22	10	33	21	8	12	12	10
			1	62-G174-13	5	12	14	2	24	28	1	2	1	2	1	1	1	1	1	1	1	1	1	3	5	4	10	21	18	15	6	11	24	21	4	33	26	3	13	29	17	7	32	19	24	28	23	15	6
			2	62-G174-13	5	12	14	2	24	28	1	2	1	2	1	1	1	1	1	1	1	1	2	28	9	4	10	20	33	6	24	29	7	10	6	19	26	3	13	29	17	7	31	11	19	18	23	15	6
			1	68-D-10-68	5	12	14	2	24	28	1	2	1	2	1	1	1	1	1	1	1	2	18	15	14	16	4	17	36	9	6	11	24	21	4	33	26	2	33	32	6	22	9	27	12	5	32	30	16
			2	68-D-10-68	5	12	14	2	24	28	1	2	1	2	1	1	1	1	1	1	1	1	2	28	9	4	10	20	33	6	25	17	5	17	8	37	40	17	16	10	16	3	32	19	24	28	23	15	6
			1	69-D-10-15	5	12	14	2	24	28	1	2	1	2	1	1	1	1	1	1	1	1	2	28	9	4	10	20	18	15	6	11	24	21	4	33	26	3	13	29	17	7	32	19	24	28	23	15	6
			2	69-D-10-15	5	12	14	2	24	28	1	2	1	2	1	1	1	1	1	1	1	1	2	28	9	4	10	20	33	6	24	29	7	10	6	19	26	4	33	32	6	22	9	27	12	5	32	30	16
			1	108-D-10-44	5	12	14	2	24	28	1	2	1	2	1	1	1	1	1	1	1	1	1	1	9	4	10	20	33	6	24	29	7	10	6	19	26	3	13	29	17	7	31	11	19	17	2	23	19
			2	108-D-10-44	3	23	30	24	8	29	19	13	1	2	1	1	1	1	1	1	1	1	2	28	9	4	10	20	18	15	6	11	24	21	4	33	26	3	13	29	17	7	32	19	24	28	23	15	6
			1	70-D-10-23	5	12	14	2	24	28	1	2	1	2	1	1	1	1	1	1	1	1	2	28	9	4	10	20	33	6	24	29	7	10	6	19	26	3	13	29	17	7	31	11	19	17	2	23	19
			2	70-D-10-23	5	12	14	2	24	28	1	2	1	2	1	1	1	1	1	1	1	1	2	28	9	4	10	20	33	6	24	29	7	10	6	19	26	4	33	32	6	22	9	27	12	5	32	30	16
			1	92-G58-15	5	12	14	2	24	28	1	2	1	2	1	1	1	1	1	1	1	1	2	28	9	4	10	20	33	6	24	35	24	21	6	19	26	3	13	29	17	7	31	11	19	17	2	23	19
			2	92-G58-15	5	12	14	2	24	28	1	2	1	2	1	1	1	1	1	1	1	1	2	28	9	4	10	20	33	6	24	29	7	10	6	19	26	3	13	29	17	7	31	11	19	17	2	23	19
			1	73-D-11-22	5	12	14	2	24	28	1	2	1	2	1	1	1	1	1	1	1	1	1	3	5	4	10	21	18	15	6	11	24	21	4	33	26	3	13	29	17	7	32	19	24	28	23	15	6
			2	73-D-11-22	5	12	14	2	24	28	1	2	1	2	1	1	1	1	1	1	1	1	2	28	9	4	10	20	33	6	24	29	7	10	6	19	26	3	13	29	17	7	31	11	19	17	2	23	19
			1	77-G87-12	8	1	3	26	30	4	9	30	1	4	29	24	8	30	27	13	4	11	19	26	28	10	18	14	18	15	6	11	24	23	8	37	37	3	13	29	17	7	32	19	24	28	23	2	31
			2	77-G87-12	3	23	30	24	8	29	19	13	36	6	8	15	33	13	30	14	9	23	17	17	5	4	10	21	18	15	6	11	24	21	4	33	26	3	13	29	17	7	32	19	24	28	23	15	6
			1	78-D-11-58	5	12	14	2	24	28	1	2	1	2	1	1	1	1	1	1	1	1	1	3	5	4	10	21	18	15	6	11	24	21	4	33	26	3	13	29	17	10	9	27	12	5	32	30	16
			2	78-D-11-58	5	12	14	2	24	28	1	2	1	2	1	1	1	1	1	1	1	1	2	28	9	4	10	20	33	6	24	29	7	10	6	19	26	3	13	29	17	7	31	11	19	17	2	23	19
			1	86-G126-13	8	1	3	26	30	4	9	30	1	4	29	24	8	30	24	13	10	11	19	26	28	10	18	14	18	15	6	11	24	10	6	19	26	3	13	29	17	7	32	19	24	28	23	15	6
			2	86-G126-13	3	23	30	24	8	29	19	13	36	6	8	15	33	13	30	14	9	23	17	17	28	10	18	14	18	15	6	11	24	21	5	10	24	22	33	32	6	22	9	27	12	5	32	30	16
			1	88-G50-12	16	19	12	8	22	9	29	22	6	33	13	34	11	24	27	7	31	11	18	15	14	16	4	17	36	9	34	33	22	22	27	15	31	15	7	17	28	22	10	33	21	8	12	12	10
			2	88-G50-12	16	19	12	8	22	9	29	22	6	33	13	34	11	24	27	7	31	11	18	15	14	16	4	17	36	9	34	33	22	22	27	15	31	15	7	17	28	22	10	33	21	8	12	12	10
			1	91-G24-14	3	23	30	24	8	29	19	13	1	2	1	1	1	1	1	1	1	1	1	28	9	4	10	20	33	6	24	29	7	10	6	19	26	3	13	29	17	7	31	11	19	17	2	23	19
			2	91-G24-14	3	23	30	24	8	29	19	13	36	6	8	15	33	13	30	14	9	23	17	17	28	10	18	14	18	15	6	11	24	21	5	10	24	22	33	32	6	22	9	27	12	5	32	30	16
			1	95-G175-13	16	19	12	8	22	9	29	22	6	33	13	34	11	24	27	7	31	11	18	15	14	16	4	17	36	9	34	33	22	22	27	15	31	15	7	17	28	22	10	33	21	8	12	12	10
			2	95-G175-13	16	19	12	8	22	9	29	22	6	33	13	34	11	24	27	7	31	11	18	15	14	16	4	17	36	9	34	33	22	22	27	15	31	15	7	17	28	22	10	33	21	8	12	12	10
			1	97-G32-12	5	12	14	2	24	28	1	2	1	2	1	1	1	1	1	1	1	1	1	3	5	4	10	21	18	15	6	11	24	21	4	33	26	3	13	29	17	7	32	19	24	28	23	15	6
			2	97-G32-12	8	1	3	26	30	4	9	30	1	4	29	24	8	30	24	7	31	11	18	15	14	16	4	17	36	9	34	33	22	22	27	15	31	15	7	17	28	22	10	33	21	8	12	12	10
			1	D-10-50	8	1	3	26	30	4	9	30	1	4	29	24	8	30	24	13	4	11	19	26	28	10	18	14	18	15	6	11	24	21	4	33	26	3	13	29	17	7	32	19	24	28	23	15	6
			2	D-10-50	3	23	30	24	8	29	19	13	36	6	8	15	33	13	30	14	9	23	17	17	28	10	18	14	18	15	6	11	24	21	5	10	24	22	33	32	6	22	9	27	12	5	32	30	16
Founder haplotype assignment:
Female founder			1	F_1	5	12	14	2	24	28	1	2	1	2	1	1	1	1	1	1	1	1	2	28	9	4	10	20	33	6	24	29	7	10	6	19	26	3	13	29	17	7	31	11	19	17	2	23	19
			2	F_2	16	19	12	8	22	9	29	22	6	33	13	34	11	24	27	7	31	11	18	15	14	16	4	17	36	9	34	33	22	22	27	15	31	15	7	17	28	22	10	33	21	8	12	12	10
First male founder			1	M1_1	15	10	40	3	23	22	22	4	26	34	8	13	4	10	19	23	13	14	20	37	3	19	27	2	10	17	36	17	5	17	8	37	40	17	16	10	16	4	24	25	3	6	3	2	31
			2	M1_2	5	12	14	2	24	28	1	2	1	2	1	1	1	1	1	1	1	1	1	3	5	4	10	21	18	15	6	11	24	21	4	33	26	3	13	29	17	7	32	19	24	28	23	15	6
Second male founder			1	M2_1	8	1	3	26	30	4	9	30	1	4	29	24	8	30	24	13	4	11	19	26	28	10	18	14	18	15	6	11	24	23	8	37	40	17	16	10	16	4	24	25	3	6	3	2	35
			2	M2_2	3	23	30	24	8	29	19	13	36	6	8	15	33	13	30	14	9	23	17	17	28	10	18	14	18	15	6	11	24	21	5	10	24	22	33	32	6	22	9	27	12	5	32	30	16
[truncated: 30 more columns]

## Sheet: chr9_1Mb
				window:	0	1	2	3	4	5	6	7	8	9	10	11	12	13	14	15	16	17	18	19	20	21	22	23	24	25	26	27	28	29	30	31	32	33	34	35	36	37	38	39	40	41	42	43	44
Female founder			1	D-85-01	7	10	23	24	6	6	42	13	7	9	4	9	20	22	14	20	35	0	26	27	4	11	6	6	13	12	10	14	12	12	38	43	7	6	7	21	2	28	29	15	15	10	3	25	16
			2	D-85-01	15	9	19	6	20	21	6	24	16	1	9	3	17	6	8	17	31	0	17	23	6	31	36	19	28	36	21	18	14	15	8	28	24	7	17	8	6	16	27	9	4	35	19	10	32
1983-1993	First male founder	F1 offspring	1	D-84-03	1	11	12	18	9	12	24	38	46	5	1	1	4	21	1	1	3	0	3	4	25	16	32	1	35	6	5	6	25	26	10	1	1	10	20	10	33	3	5	1	20	14	1	1	1
			2	D-84-03	7	10	23	24	6	6	42	13	7	9	4	9	20	22	14	20	35	0	26	27	4	11	6	6	13	12	10	14	12	12	38	43	7	6	7	21	2	28	29	15	15	10	3	25	16
			1	D-85-02	1	11	12	18	9	12	24	38	46	5	1	1	4	21	1	1	3	0	3	4	25	16	32	1	35	6	5	6	25	26	10	1	1	10	20	10	33	3	5	1	20	14	1	1	1
			2	D-85-02	7	10	23	24	6	6	42	13	7	9	4	9	20	22	14	20	35	0	26	27	4	11	6	6	13	12	10	14	12	12	38	43	7	6	7	21	2	28	29	15	15	10	3	25	16
			1	3-D-86-01	1	11	12	18	9	12	24	38	46	5	1	1	4	21	1	1	3	0	3	4	25	16	32	1	35	6	5	6	25	26	10	1	1	10	20	10	33	3	5	1	20	14	1	1	1
			2	3-D-86-01	15	9	19	6	20	21	6	24	16	1	9	3	17	6	8	17	31	0	17	23	6	31	36	19	28	36	21	18	14	15	8	28	24	7	17	8	6	16	27	9	4	35	19	10	32
		F2 offspring	1	4-D-89-01	1	11	12	18	9	12	24	38	46	5	1	1	4	21	1	1	3	0	3	4	25	16	32	1	35	6	5	6	25	26	10	1	7	6	7	21	2	28	29	15	15	10	3	25	16
			2	4-D-89-01	1	11	12	18	9	12	24	38	46	5	1	1	4	21	1	1	3	0	3	4	25	16	32	1	35	6	5	6	25	26	10	1	4	6	7	21	2	28	29	15	15	10	3	25	16
			1	5-D-91-01	1	11	12	18	9	12	24	38	46	5	1	1	4	21	1	1	3	0	3	4	25	16	32	1	35	6	5	6	25	26	10	1	1	10	20	10	33	3	5	1	20	14	1	1	1
			2	5-D-91-01	1	11	12	18	9	12	24	38	46	5	1	1	4	21	1	1	3	0	3	4	25	16	32	1	35	6	5	6	25	26	10	1	1	10	20	10	33	3	5	1	20	14	1	1	1
			1	16-D-89-03	1	11	12	18	9	12	24	38	46	5	1	1	4	21	1	1	3	0	3	4	25	16	32	1	35	6	5	6	25	26	10	1	1	10	20	10	33	3	5	1	20	14	1	1	1
			2	16-D-89-03	7	10	23	24	6	6	42	13	7	9	4	9	20	22	14	20	35	0	26	27	4	11	6	6	13	12	10	14	12	12	38	43	7	6	7	21	2	28	29	15	15	10	3	25	16
			1	17-D-92-05	1	11	12	18	9	12	24	38	46	5	1	1	4	21	1	1	3	0	3	4	25	16	32	1	35	6	5	6	25	26	10	1	1	10	21	21	2	28	29	15	15	10	3	25	16
			2	17-D-92-05	1	11	12	18	9	12	24	38	46	5	1	1	4	21	1	1	3	0	3	4	25	16	32	1	35	6	5	6	25	26	10	1	1	10	20	10	33	3	5	1	20	14	1	1	1
			1	30-D-93-02	7	10	23	24	6	5	24	38	46	5	1	1	4	21	1	1	3	0	3	4	25	16	32	1	35	6	5	6	25	26	10	1	1	10	20	10	33	3	5	1	20	14	1	1	1
			2	30-D-93-02	7	10	23	24	6	6	42	13	7	9	4	9	20	22	14	20	35	0	26	27	4	11	6	6	13	12	10	14	12	12	38	43	7	6	7	21	2	28	29	15	15	10	3	25	16
		F3 offspring	1	6-M-98-02	1	11	12	19	15	12	24	38	46	5	1	1	4	21	1	1	3	0	3	4	25	16	32	1	35	6	5	6	25	26	10	1	1	10	20	10	33	3	5	1	20	14	1	1	1
			2	6-M-98-02	1	11	12	18	9	12	24	38	46	5	1	1	4	21	1	1	3	0	3	4	25	16	32	1	35	6	5	6	25	26	10	1	1	10	21	21	2	28	29	15	15	10	3	25	16
			1	31-D-93-03	1	11	12	19	15	12	24	38	46	5	1	1	4	21	1	1	3	0	3	4	25	16	32	1	35	6	5	6	25	26	10	1	1	10	20	10	33	3	5	1	20	14	1	1	1
			2	31-D-93-03	7	10	23	24	6	6	42	13	7	9	4	9	20	22	14	20	35	0	26	27	4	11	6	6	13	12	10	14	12	12	38	43	7	6	7	21	2	28	29	15	15	10	3	25	16
			1	19-D-94-01	1	11	12	19	15	12	24	38	46	5	1	1	4	21	1	1	3	0	3	4	25	16	32	1	35	6	5	6	25	26	10	1	1	10	20	10	33	3	5	1	20	14	1	1	1
			2	19-D-94-01	1	11	12	18	9	12	24	38	46	5	1	1	4	21	1	1	3	0	3	4	25	16	32	1	35	6	5	6	25	26	10	1	1	10	20	10	33	3	5	1	20	14	1	1	1
			1	57-D-92-06	1	11	12	18	9	12	24	38	46	5	1	1	4	21	1	1	3	0	3	4	25	16	32	1	35	6	5	6	25	26	10	1	1	10	21	21	2	28	29	15	15	10	3	25	16
			2	57-D-92-06	1	11	12	18	9	12	24	38	46	5	1	1	4	21	1	1	3	0	3	4	25	16	32	1	35	6	5	6	25	26	10	1	1	10	20	10	33	3	5	1	20	14	1	1	1
	Second male founder	F1 offspring	1	94-D-92-01	4	12	4	16	1	23	27	55	41	15	19	25	21	15	20	27	19	0	37	4	25	16	32	1	35	6	5	10	20	11	13	41	17	6	13	28	16	23	32	11	1	33	29	7	9
			2	94-D-92-01	7	10	23	24	6	6	42	13	7	1	9	3	17	6	8	17	31	0	17	23	6	31	36	19	28	36	21	18	14	15	8	28	24	7	17	8	6	16	27	9	4	35	19	10	32
			1	59-D-96-01	1	11	12	18	9	12	24	38	46	1	9	3	17	6	8	16	3	0	17	23	6	31	36	19	28	36	21	18	14	15	8	28	24	7	17	8	6	16	27	9	4	35	19	10	32
			2	59-D-96-01	4	12	4	16	1	23	27	55	41	15	19	25	21	16	19	23	14	0	45	14	4	11	17	35	3	11	28	21	18	16	12	31	13	6	12	10	32	22	22	26	18	16	6	29	12
			1	43-D-92-02	1	11	12	18	9	12	24	38	46	5	1	1	4	21	1	1	3	0	3	4	25	16	32	1	35	6	2	18	14	15	8	28	24	7	17	8	6	16	27	9	4	35	19	10	32
			2	43-D-92-02	4	12	4	16	1	23	27	55	41	15	19	25	21	16	19	23	14	0	45	14	4	11	17	35	3	11	28	21	18	16	12	31	13	6	12	10	32	22	22	26	18	16	6	29	12
			1	D-93-01	7	10	23	24	6	6	42	13	7	1	9	3	17	6	8	17	31	0	17	23	6	31	36	19	28	36	21	18	14	15	8	28	24	7	17	8	6	16	27	9	4	35	19	10	32
			2	D-93-01	12	18	7	25	11	11	1	35	21	14	11	31	33	13	20	27	19	0	37	4	25	16	32	1	35	6	5	10	20	11	13	40	13	6	12	10	32	22	22	26	18	16	6	29	12
			1	8492	1	11	12	18	9	12	24	38	46	5	1	1	4	21	1	1	3	0	3	4	25	16	32	1	35	6	5	6	25	26	10	1	1	10	20	10	33	3	5	1	20	14	1	1	1
			2	8492	4	12	4	16	1	23	27	55	41	15	19	25	21	16	19	23	14	0	45	14	4	11	17	35	3	11	28	21	18	16	12	31	13	6	12	10	32	22	22	26	18	16	6	29	12
			1	22-D-99-02	1	11	12	18	9	12	24	38	46	5	1	1	4	21	1	1	3	0	3	4	25	16	32	1	35	6	5	6	25	26	10	1	1	10	20	10	33	3	5	1	20	14	1	1	1
			2	22-D-99-02	4	12	4	16	1	23	27	55	41	15	19	25	21	16	19	23	14	0	45	14	4	11	17	35	3	11	28	21	18	16	12	31	13	6	12	10	32	22	22	26	18	16	6	29	12
			1	11-M-98-03	7	10	23	24	6	6	42	13	7	1	9	3	17	6	8	17	31	0	17	23	6	31	36	19	28	36	21	18	14	15	8	28	24	7	17	8	6	16	27	9	4	35	19	10	32
			2	11-M-98-03	12	18	7	25	11	11	1	35	21	14	11	31	33	13	20	27	19	0	37	4	25	16	32	1	35	6	5	10	20	11	13	41	17	6	13	28	16	23	32	11	1	33	29	7	9
1994-2005			1	Varg0109	1	11	12	18	9	12	24	38	46	5	1	1	4	21	1	1	3	0	3	4	25	16	32	1	35	6	5	6	25	26	10	1	1	10	21	21	2	28	29	15	15	10	3	25	16
			2	Varg0109	7	10	23	24	6	6	42	13	7	1	9	3	17	6	8	17	31	0	17	23	6	31	36	19	28	36	21	18	14	15	8	28	24	7	17	8	6	16	27	9	4	35	19	10	31
			1	105-D-00-15	1	11	12	18	9	12	24	38	46	5	1	1	4	21	1	1	3	0	3	4	25	16	32	1	35	6	5	3	12	12	38	43	7	6	7	21	2	28	29	15	15	10	3	25	16
			2	105-D-00-15	4	12	4	16	1	23	27	55	41	15	19	25	21	16	19	23	14	0	45	14	4	11	17	35	3	11	28	21	18	16	12	30	1	10	20	10	33	3	5	1	20	14	1	1	1
			1	12-M-01-04	1	11	12	18	9	12	24	38	46	5	1	1	4	21	1	1	3	0	3	4	25	16	32	1	35	6	5	6	25	26	10	1	1	10	20	10	33	3	5	1	20	14	1	1	1
			2	12-M-01-04	7	10	23	24	6	6	42	13	7	1	9	3	17	6	8	17	31	0	17	23	6	31	36	19	28	36	21	18	14	15	8	28	24	7	17	8	16	23	32	11	1	33	29	7	9
			1	14-M-00-09	1	11	12	18	9	12	24	38	46	5	1	1	4	21	1	1	3	0	3	4	25	16	32	1	35	6	5	3	12	12	38	43	7	6	7	21	2	28	29	15	15	10	3	25	16
			2	14-M-00-09	1	12	4	16	1	23	27	55	41	15	19	25	21	16	19	23	14	0	45	14	4	11	17	35	3	11	28	21	18	16	12	31	13	6	12	10	32	22	22	26	18	16	6	29	12
			1	15-M-01-10	1	11	12	18	9	12	24	38	46	5	1	1	4	21	1	1	3	0	3	4	25	16	32	1	35	6	5	3	12	12	38	43	7	6	7	21	2	28	29	15	15	10	3	25	16
			2	15-M-01-10	1	11	12	18	9	12	24	38	46	5	1	1	4	21	1	1	3	0	3	4	25	16	32	1	35	6	5	6	25	26	10	1	1	10	21	21	2	28	29	15	15	10	3	25	16
			1	28-M-03-07	1	11	12	18	9	12	24	38	46	5	1	1	4	21	1	1	3	0	3	4	25	16	32	1	35	6	5	3	12	12	38	43	7	6	7	21	2	28	29	15	15	10	3	25	16
			2	28-M-03-07	12	18	7	25	11	11	1	35	20	1	9	3	17	6	8	17	31	0	17	23	6	31	36	19	28	36	21	18	14	15	8	28	24	7	17	8	6	16	27	9	4	35	19	10	32
			1	75-G9-05	1	11	12	18	9	12	24	38	46	5	1	1	4	21	1	1	3	0	3	4	25	16	32	1	35	6	5	6	25	26	10	1	1	10	21	21	3	22	22	26	18	16	5	1	1
			2	75-G9-05	4	12	4	16	1	23	27	55	41	1	9	3	17	6	8	17	31	0	17	23	6	31	36	19	28	36	21	18	14	15	8	28	24	7	17	8	6	16	27	10	20	14	1	1	1
			1	D-01-18	1	11	12	18	9	12	24	38	46	5	1	1	4	21	1	1	3	0	3	4	25	16	32	1	35	6	5	3	12	12	38	43	7	6	7	21	2	28	29	15	15	10	3	25	16
			2	D-01-18	1	11	12	18	9	12	24	38	46	5	1	1	4	21	1	1	3	0	3	4	25	16	32	1	35	6	5	6	25	26	10	1	1	10	20	10	33	3	5	1	20	14	1	1	1
			1	110-M-01-06	1	11	12	18	9	12	24	38	46	1	9	3	17	6	8	16	3	0	17	23	6	31	36	19	28	36	21	18	14	15	8	28	24	7	17	8	16	23	32	11	1	33	29	7	9
			2	110-M-01-06	12	18	8	19	15	12	24	38	46	5	1	1	4	21	1	1	3	0	3	4	25	16	32	1	35	6	5	6	25	26	10	1	1	10	20	10	33	3	5	1	20	14	1	1	1
			1	13-M-98-08	1	11	12	18	9	12	24	38	46	5	1	1	4	21	1	1	3	0	3	4	25	16	32	1	35	6	5	6	25	26	10	1	1	10	20	10	33	3	5	1	20	14	1	1	1
			2	13-M-98-08	7	10	23	24	6	6	42	13	7	1	9	3	17	6	8	17	31	0	17	23	6	31	36	19	28	36	21	18	14	15	8	28	24	7	17	8	6	16	27	9	4	35	19	10	32
			1	25-M-03-06	1	11	12	18	9	12	24	38	46	5	1	1	4	21	1	1	3	0	3	4	25	16	32	1	35	6	5	3	12	12	38	43	7	4	20	10	33	3	5	1	20	14	1	1	1
			2	25-M-03-06	4	12	4	16	1	23	27	55	41	15	19	25	21	16	19	23	14	0	45	14	4	10	32	1	35	6	5	10	20	11	13	41	17	6	13	28	16	23	32	11	1	33	29	7	9
			1	35-D-05-23	1	11	12	18	9	12	24	38	46	5	1	1	4	21	1	1	3	0	3	4	25	16	32	1	35	6	5	6	25	26	10	1	1	10	21	21	2	28	29	15	15	10	3	25	16
			2	35-D-05-23	1	11	12	18	9	12	24	38	46	5	1	1	4	21	1	1	3	0	3	4	25	16	32	1	35	6	5	6	25	26	10	1	1	10	20	10	33	3	5	1	20	14	1	1	1
			1	38-D-06-16	1	11	12	19	15	12	24	38	46	5	1	1	4	21	1	1	3	0	3	4	25	16	32	1	35	6	5	6	25	26	10	1	1	10	20	10	33	3	5	1	20	14	1	1	1
			2	38-D-06-16	7	10	23	24	6	6	42	13	7	5	1	1	4	21	1	1	3	0	3	4	25	16	32	1	35	6	5	6	25	26	10	1	1	10	20	10	33	3	5	1	20	14	1	1	1
			1	60-M-00-10	1	11	12	18	9	12	24	38	46	5	1	1	4	21	1	1	3	0	3	4	25	16	32	1	35	6	5	6	25	26	10	1	1	10	20	10	33	3	5	1	20	14	1	1	1
			2	60-M-00-10	1	11	12	18	9	12	24	38	7	5	1	2	20	22	14	20	35	0	3	4	25	16	32	1	35	6	5	3	12	12	38	43	7	6	7	21	2	28	29	15	15	10	3	25	16
			1	D-00-12	7	10	23	24	6	6	42	13	7	5	1	2	20	22	14	20	35	0	3	4	25	16	32	1	35	6	5	6	25	26	10	1	1	10	21	21	2	28	29	15	15	10	3	25	16
			2	D-00-12	12	18	7	25	11	11	1	35	21	14	11	31	33	13	20	27	19	0	37	4	25	16	32	1	35	6	5	10	20	11	13	41	16	10	21	21	2	28	29	15	15	10	3	25	16
			1	M-98-01	7	10	23	24	6	6	42	13	7	5	1	2	20	22	14	20	35	0	3	4	25	16	32	1	35	6	5	6	25	26	10	1	1	10	21	21	2	28	29	15	15	10	3	25	16
			2	M-98-01	12	18	7	25	11	11	1	35	21	14	11	31	33	13	20	27	19	0	37	4	25	16	32	1	35	6	5	10	20	11	15	1	1	10	20	10	33	3	5	1	20	14	1	1	1
			1	V009511	1	11	12	18	9	12	24	38	46	5	1	1	4	21	1	1	3	0	3	4	25	16	32	1	35	6	5	3	12	12	38	43	7	4	20	10	33	3	5	1	20	14	1	1	1
			2	V009511	1	11	12	18	9	12	24	38	46	5	1	1	4	21	1	1	3	0	3	4	25	16	32	1	35	6	5	6	25	26	10	1	1	10	20	10	33	3	5	1	20	14	1	1	1
			1	106-D-10-20	1	11	12	18	9	12	24	38	46	5	1	1	4	21	1	1	3	0	3	4	25	16	32	1	35	6	5	6	25	26	10	1	1	10	21	21	2	28	29	15	15	10	3	25	16
			2	106-D-10-20	1	11	12	18	9	12	24	38	46	5	1	1	4	21	1	1	3	0	3	4	25	16	32	1	35	6	5	6	25	26	10	1	1	10	20	10	33	3	5	1	20	14	1	1	1
			1	109-D-10-30	7	10	23	24	6	6	42	13	7	1	9	3	17	6	8	17	31	0	17	23	6	31	36	19	28	36	21	18	14	15	8	28	24	7	17	8	6	16	27	9	4	36	29	7	9
			2	109-D-10-30	12	18	7	25	11	11	1	35	46	5	1	1	4	21	1	1	3	0	3	6	4	11	17	35	3	11	28	21	18	16	10	1	1	10	21	21	2	28	29	15	15	10	3	25	16
			1	36-D-06-14	1	11	12	18	9	12	24	38	46	5	1	1	4	21	1	1	3	0	3	4	25	16	32	1	35	6	5	6	25	26	10	1	1	10	21	21	2	28	29	15	15	10	3	25	16
			2	36-D-06-14	12	18	7	25	11	11	1	35	21	14	11	31	33	13	20	27	19	0	37	5	6	31	36	19	28	36	21	18	14	15	8	28	24	7	17	8	6	16	27	10	20	14	1	1	1
			1	37-M-06-03	4	12	4	16	1	23	27	55	41	15	19	25	21	16	19	23	14	0	45	14	4	11	17	35	3	11	28	21	18	16	12	30	1	10	20	10	33	3	5	1	20	14	1	1	1
			2	37-M-06-03	4	12	4	16	1	23	27	55	41	15	19	25	21	16	19	23	14	0	45	14	4	8	32	1	35	6	5	6	25	26	10	1	1	10	21	21	2	28	29	15	15	10	3	25	16
			1	39-M-06-04	1	11	12	19	15	12	24	38	46	5	1	1	4	21	1	1	3	0	3	4	25	16	32	1	35	6	5	6	25	26	10	1	1	10	21	21	2	28	29	14	20	14	1	1	1
			2	39-M-06-04	4	12	4	16	1	23	27	55	41	15	19	25	21	16	19	23	14	0	45	14	4	8	32	1	35	6	5	6	25	26	10	1	1	10	21	21	2	28	29	15	15	10	3	25	16
			1	40-D-07-28	7	10	23	24	6	6	42	13	7	5	1	1	4	21	1	1	3	0	3	4	25	16	32	1	35	6	5	6	25	26	10	1	1	10	20	10	33	3	5	1	20	14	1	1	1
			2	40-D-07-28	12	18	7	25	11	11	1	35	21	14	11	31	33	13	20	27	19	0	37	4	25	16	32	1	35	6	5	10	20	11	13	41	17	6	13	28	16	23	32	11	1	33	29	7	9
			1	55-D-08-10	7	10	23	24	6	6	42	13	7	5	1	1	4	21	1	1	3	0	3	4	25	16	32	1	35	6	5	6	25	26	10	1	1	10	20	10	33	3	5	1	20	14	1	1	1
			2	55-D-08-10	12	18	7	25	11	11	1	35	21	14	11	31	33	13	20	27	19	0	37	4	25	16	32	1	35	6	5	10	20	11	13	41	17	6	13	28	16	23	32	11	1	33	29	7	9
			1	80-M-09-17	1	11	12	18	9	12	24	38	46	5	1	1	4	21	1	1	3	0	3	4	25	16	32	1	35	6	5	6	25	26	10	1	1	10	20	10	33	3	5	1	20	14	1	1	3
			2	80-M-09-17	1	11	12	18	9	12	24	38	46	5	1	1	4	21	1	1	3	0	3	4	25	16	32	1	35	6	5	6	25	26	10	1	1	10	21	21	2	28	29	15	15	23	1	1	1
			1	D-08-20	1	11	12	18	9	12	24	38	46	5	1	1	4	21	1	1	3	0	3	4	25	16	32	1	35	6	5	6	25	26	10	1	1	10	21	21	2	28	29	15	15	10	3	25	16
			2	D-08-20	7	10	23	24	6	6	42	13	7	1	9	3	17	6	8	17	31	0	17	23	6	31	36	19	28	36	21	18	14	15	8	28	24	7	17	8	6	16	27	9	4	36	29	7	9
			1	M-05-07	1	11	12	18	9	12	24	38	46	5	1	1	4	21	1	1	3	0	3	4	25	16	32	1	35	6	5	10	20	11	13	41	17	6	13	28	16	23	32	11	1	33	29	7	9
			2	M-05-07	4	12	4	16	1	23	27	55	41	15	19	25	21	16	19	23	14	0	45	14	4	11	17	35	3	11	28	21	18	16	12	30	1	10	20	10	33	3	5	1	20	14	1	1	1
			1	81-M-09-05	1	11	12	19	15	12	24	38	46	5	1	1	4	21	1	1	3	0	3	4	25	16	32	1	35	6	5	6	25	26	10	1	1	10	21	21	2	28	18	1	20	14	1	1	1
			2	81-M-09-05	1	11	12	18	9	12	24	38	46	5	1	1	4	21	1	1	3	0	3	4	25	16	32	1	35	6	5	6	25	26	10	1	1	10	21	21	3	22	22	26	18	16	5	1	1
2006-2014			1	103-D-11-17	7	10	23	24	6	6	42	13	7	1	9	3	17	6	8	17	31	0	17	23	6	31	36	19	28	36	21	18	14	15	8	28	24	7	17	8	6	16	27	9	4	35	19	10	31
			2	103-D-11-17	7	10	23	24	6	6	42	13	7	1	9	3	17	6	8	17	31	0	17	23	6	31	36	19	28	36	21	18	14	15	8	28	24	7	17	8	6	16	27	9	4	36	29	7	9
			1	112-D-10-29	1	11	12	18	9	12	24	38	46	5	1	1	4	21	1	1	3	0	3	4	25	16	32	1	35	6	5	6	25	26	10	1	1	10	21	21	3	22	22	26	18	16	5	1	1
			2	112-D-10-29	1	11	12	18	9	12	24	38	46	5	1	1	4	21	1	1	3	0	3	4	25	16	32	1	35	6	5	6	25	26	10	1	1	10	20	10	33	11	29	15	15	10	3	25	16
			1	45-D-07-24	1	11	12	20	15	12	24	38	46	5	1	1	4	21	1	1	3	0	3	4	25	16	32	1	35	11	28	21	18	26	12	31	13	6	12	10	32	22	22	26	18	16	6	29	12
			2	45-D-07-24	4	12	4	16	1	23	27	55	41	15	19	25	21	16	19	23	14	0	45	14	4	11	17	35	3	11	28	21	18	26	10	1	1	10	21	21	2	28	29	15	15	10	3	25	16
			1	48-D-08-21	1	11	12	18	9	12	24	38	46	5	1	1	4	21	1	1	3	0	3	4	25	16	32	1	35	6	5	3	12	12	38	43	7	4	20	10	33	3	19	15	15	10	3	25	16
			2	48-D-08-21	1	11	12	18	9	12	24	38	46	5	1	1	4	21	1	1	3	0	3	4	25	16	32	1	35	6	5	6	25	26	10	1	1	10	20	10	33	3	5	1	20	14	1	1	1
			1	51-D-07-09	1	11	12	18	9	12	24	38	46	5	1	1	4	21	1	1	3	0	3	4	25	16	32	1	35	6	5	6	25	26	8	28	24	7	17	8	6	16	27	9	4	35	19	10	31
			2	51-D-07-09	1	11	12	18	9	12	24	38	46	5	1	1	4	21	1	1	3	0	3	4	25	16	32	1	35	6	5	6	25	26	10	1	1	10	21	21	6	16	27	8	4	35	19	10	31
			1	52-D-07-17	1	11	12	18	9	12	24	38	46	5	1	1	4	21	1	1	3	0	3	23	6	31	36	19	28	36	21	18	14	15	8	28	24	7	17	8	6	16	27	9	4	35	19	9	16
			2	52-D-07-17	1	11	12	18	9	12	24	38	46	5	1	1	4	21	1	1	3	0	3	4	25	16	32	1	35	6	5	6	25	26	10	1	1	10	21	21	2	28	29	15	15	10	3	25	9
			1	53-D-08-08	1	11	12	18	9	12	24	38	46	5	1	1	4	21	1	1	3	0	3	4	25	16	32	1	35	6	5	6	25	26	10	1	1	10	21	21	2	28	29	15	15	10	3	25	9
			2	53-D-08-08	1	11	12	18	9	12	24	38	46	5	1	1	4	21	1	1	3	0	3	4	25	16	32	1	34	36	21	18	14	15	8	28	24	7	17	8	6	16	27	9	4	35	19	9	16
			1	54-M-07-06	12	18	7	25	11	11	1	35	46	5	1	1	4	21	1	1	3	0	3	4	25	16	32	1	35	6	5	6	25	26	10	1	1	10	20	10	33	3	5	1	20	14	1	1	1
			2	54-M-07-06	12	18	7	25	11	11	1	35	46	5	1	1	4	21	1	1	3	0	3	4	25	16	32	1	35	6	5	6	25	26	10	1	1	10	20	10	33	3	5	1	20	14	1	1	1
			1	56-D-07-16	1	11	12	19	15	12	24	38	46	5	1	1	4	21	1	1	3	0	3	4	25	16	32	1	35	6	5	6	25	26	10	1	1	10	20	10	33	3	5	1	20	14	1	1	1
			2	56-D-07-16	12	18	7	25	11	11	1	35	21	14	11	31	33	13	20	27	19	0	37	4	25	16	32	1	35	6	5	10	20	11	13	41	17	6	13	28	16	23	32	11	1	33	29	7	9
			1	D-08-19	1	11	12	18	9	12	24	38	46	5	1	1	4	21	1	1	3	0	3	4	25	16	32	1	35	6	5	10	20	11	13	41	17	6	13	28	16	23	32	11	2	35	19	10	32
			2	D-08-19	7	10	23	24	6	6	42	13	7	1	9	3	17	6	8	17	31	0	17	23	7	16	32	1	35	6	5	3	12	12	38	43	6	7	17	8	6	16	27	9	4	35	19	10	31
			1	102-G34-10	4	12	4	16	1	23	27	55	41	5	1	1	4	21	1	1	3	0	3	4	25	16	32	1	35	6	5	6	25	26	10	1	1	10	15	21	2	28	29	15	15	10	3	25	16
			2	102-G34-10	4	12	4	16	1	23	27	55	41	15	19	25	21	16	19	23	14	0	45	14	4	11	17	36	35	6	5	6	25	26	10	1	1	10	20	21	2	28	29	15	15	10	3	25	16
			1	111-G110-11	1	11	12	18	9	12	24	38	46	5	1	1	4	21	1	1	3	0	3	4	25	16	32	1	35	6	5	6	25	26	10	1	1	10	21	21	2	28	29	15	15	10	3	25	16
			2	111-G110-11	1	11	12	18	9	12	24	38	46	5	1	1	4	21	1	1	3	0	3	4	25	16	32	1	35	6	5	6	25	26	10	1	1	10	20	10	33	3	5	1	20	14	1	1	1
			1	61-G97-13	1	11	12	18	9	12	24	38	46	5	1	1	4	21	1	1	3	0	3	4	25	16	32	1	35	6	5	6	25	26	10	1	1	10	20	10	33	3	5	1	20	14	1	1	1
			2	61-G97-13	1	11	12	18	9	12	24	38	46	5	1	1	4	21	1	1	3	0	3	4	25	16	32	1	35	6	5	6	25	26	10	1	1	10	21	21	2	28	29	15	15	14	1	1	1
			1	62-G174-13	1	11	12	18	9	12	24	38	46	5	1	1	4	21	1	1	3	0	3	4	25	16	32	1	35	6	7	21	18	16	10	1	1	10	21	21	2	28	29	15	15	10	3	25	16
			2	62-G174-13	1	11	12	18	9	12	24	38	46	5	1	1	4	21	1	1	3	0	3	4	25	16	32	1	35	6	5	6	25	26	10	1	1	10	21	21	2	28	29	15	15	14	1	1	1
			1	68-D-10-68	12	18	7	25	11	11	1	35	47	5	1	1	4	21	1	1	3	0	3	4	25	16	32	1	35	6	5	6	25	26	10	1	1	10	20	10	33	3	5	1	20	14	1	1	1
			2	68-D-10-68	7	10	23	24	6	6	42	13	7	1	1	1	4	21	1	1	3	0	3	4	25	16	32	1	35	6	5	6	25	26	10	1	1	10	21	21	2	28	29	15	15	10	3	25	16
			1	69-D-10-15	4	12	4	16	1	23	27	55	41	15	19	25	21	16	19	23	14	0	45	14	4	11	17	35	3	11	28	21	18	16	12	30	1	10	20	10	33	3	5	1	20	14	1	1	1
			2	69-D-10-15	7	10	23	24	6	6	42	13	7	5	9	3	17	6	8	17	31	0	3	4	25	16	32	1	35	6	5	6	25	26	10	1	1	10	20	10	33	3	5	1	20	14	1	1	1
			1	108-D-10-44	4	12	4	16	1	23	27	55	41	15	19	25	21	16	19	23	14	0	45	14	4	11	17	35	3	11	28	21	18	16	12	30	1	10	20	10	33	3	5	1	20	14	1	1	1
			2	108-D-10-44	12	18	7	25	11	11	1	35	46	5	1	1	4	21	1	1	3	0	3	4	25	16	32	1	35	6	6	21	18	16	12	30	1	10	21	10	33	3	5	1	20	14	1	4	32
			1	70-D-10-23	4	12	4	16	1	23	27	55	41	15	19	25	21	16	19	23	14	0	45	14	4	11	17	35	3	11	28	21	18	26	12	30	1	10	20	10	33	3	5	1	20	14	1	1	1
			2	70-D-10-23	12	18	7	25	11	11	1	35	46	5	1	1	4	21	1	1	3	0	3	4	25	16	32	1	35	6	5	6	25	26	10	1	1	10	21	10	33	3	5	1	20	14	1	1	1
			1	92-G58-15	1	11	12	18	9	12	24	38	46	5	1	1	4	21	1	1	3	0	3	4	25	16	32	1	35	6	5	3	12	12	38	44	1	10	21	21	2	28	29	15	15	10	3	25	16
			2	92-G58-15	7	10	23	24	6	6	42	13	7	5	9	3	17	6	8	17	31	0	17	23	6	31	36	19	28	36	21	18	14	15	8	28	23	10	21	21	2	28	30	9	4	35	19	10	31
			1	73-D-11-22	1	11	12	18	9	12	24	38	46	5	1	1	4	21	1	1	3	0	3	4	25	16	32	1	35	6	5	6	25	26	10	1	1	10	20	10	33	3	5	1	20	14	1	1	1
			2	73-D-11-22	12	18	7	25	11	11	1	35	46	5	1	1	4	21	1	1	3	0	3	4	25	16	32	1	35	6	5	6	25	26	10	1	1	10	21	10	33	3	5	1	20	14	1	1	1
			1	77-G87-12	1	11	12	18	9	12	24	38	46	5	9	2	20	22	14	20	32	0	3	4	25	16	32	1	35	6	5	6	25	26	10	1	1	10	20	10	33	3	29	26	18	16	5	1	1
			2	77-G87-12	1	11	12	18	9	12	24	38	46	5	1	1	4	21	1	1	3	0	3	4	25	16	32	1	35	6	5	6	25	26	10	1	1	10	20	10	33	3	5	1	20	14	1	1	1
			1	78-D-11-58	1	11	12	18	9	12	24	38	46	5	1	1	4	21	1	1	3	0	17	23	6	31	36	19	28	36	21	18	14	15	8	28	24	7	17	8	6	16	22	26	18	16	5	1	1
			2	78-D-11-58	12	18	7	25	11	11	1	35	21	1	9	3	17	6	8	17	31	0	17	23	6	31	36	19	28	36	21	18	14	10	10	1	1	10	20	10	33	3	5	1	20	14	1	1	1
			1	86-G126-13	4	12	5	24	6	6	42	13	7	1	9	3	17	6	8	17	31	0	17	23	6	31	36	19	28	36	21	18	14	15	8	28	24	7	17	8	6	16	27	9	4	36	29	7	9
			2	86-G126-13	4	12	4	16	1	23	27	55	41	15	19	25	21	16	19	23	14	0	45	14	4	11	17	35	3	11	28	24	20	11	13	41	17	6	13	28	16	23	32	11	1	33	29	5	1
			1	88-G50-12	1	11	12	18	9	12	24	38	46	5	1	1	4	21	1	1	3	0	3	4	25	16	32	1	35	6	5	3	12	12	39	1	1	10	21	21	3	22	22	26	18	16	5	1	1
			2	88-G50-12	4	12	4	16	1	23	27	55	41	15	19	25	21	16	19	23	14	0	45	14	4	10	32	1	35	6	5	6	25	26	10	1	1	10	21	21	3	22	22	26	18	16	5	1	1
			1	91-G24-14	1	11	12	18	9	12	24	38	46	5	1	1	4	21	1	1	3	0	3	4	25	16	32	1	35	6	5	6	25	26	10	1	1	10	15	21	2	28	29	15	15	10	3	25	16
			2	91-G24-14	4	12	4	16	1	23	27	55	41	15	19	25	21	16	19	27	14	0	45	14	4	11	17	35	3	11	28	21	18	16	12	30	1	10	21	10	33	3	5	1	20	14	1	1	1
			1	95-G175-13	1	11	12	18	9	12	24	38	46	5	1	1	4	21	1	1	3	0	3	4	25	16	32	1	35	6	5	6	25	26	10	1	1	10	21	21	3	22	5	1	20	14	1	1	1
			2	95-G175-13	1	11	12	18	9	12	24	38	46	5	1	1	4	21	1	1	3	0	3	4	25	16	32	1	35	6	5	6	25	26	10	1	1	10	21	21	3	22	22	26	18	16	5	1	1
			1	97-G32-12	1	11	12	18	9	12	24	38	46	5	1	1	4	21	1	1	3	0	3	4	25	16	32	1	35	6	5	6	25	26	10	1	1	10	20	10	33	3	5	1	20	14	1	1	3
			2	97-G32-12	1	11	12	18	9	12	24	38	46	5	1	1	4	21	1	1	3	0	3	4	25	16	32	1	35	6	5	6	25	26	10	1	1	10	20	10	33	3	5	1	20	14	1	1	1
			1	D-10-50	4	12	4	16	1	23	27	55	41	1	9	3	17	6	8	17	31	0	17	23	6	31	36	19	28	36	21	18	14	15	8	28	24	7	17	8	6	16	27	10	20	14	1	1	1
			2	D-10-50	12	18	7	25	11	11	1	35	46	5	1	1	4	21	1	1	3	0	3	4	25	16	32	1	35	6	5	6	25	26	10	1	1	10	20	10	33	3	5	1	20	14	1	1	1
Founder haplotype assignment:
Female founder			1	F_1	7	10	23	24	6	6	42	13	7	9	4	9	20	22	14	20	35	7	26	27	4	11	6	6	13	12	10	14	12	12	38	43	7	6	7	21	2	28	29	15	15	10	3	25	16
			2	F_2	15	9	19	6	20	21	6	24	16	1	9	3	17	6	8	17	31	7	17	23	6	31	36	19	28	36	21	18	14	15	8	28	24	7	17	8	6	16	27	9	4	35	19	10	32
First male founder			1	M1_1	1	11	12	18	9	12	24	38	46	5	1	1	4	21	1	1	3	7	3	4	25	16	32	1	35	6	5	6	25	26	10	1	1	10	20	10	33	3	5	1	20	14	1	1	1
			2	M1_2	1	11	12	19	15	12	24	38	46	5	1	1	4	21	1	1	3	7	3	4	25	16	32	1	35	6	5	6	25	26	10	1	1	10	20	10	33	3	5	1	20	14	1	1	1
Second male founder			1	M2_1	4	12	4	16	1	23	27	55	41	15	19	25	21	16	19	23	14	7	45	14	4	11	17	35	3	11	28	21	18	16	12	31	13	6	12	10	32	22	22	26	18	16	6	29	12
			2	M2_2	12	18	7	25	11	11	1	35	21	14	11	31	33	13	20	27	19	7	37	4	25	16	32	1	35	6	5	10	20	11	13	41	17	6	13	28	16	23	32	11	1	33	29	7	9
[truncated: 17 more columns]

[truncated: 30 more sheets: chr10_1Mb, chr11_1Mb, chr12_1Mb, chr13_1Mb, chr14_1Mb, chr15_1Mb, chr16_1Mb, chr17_1Mb, chr18_1Mb, chr19_1Mb, chr20_1Mb, chr21_1Mb, chr22_1Mb, chr23_1Mb, chr24_1Mb, chr25_1Mb, chr26_1Mb, chr27_1Mb, chr28_1Mb, chr29_1Mb …]
