# Supplementary material for: Whole-genome resequencing of temporally stratified samples reveals substantial loss of haplotype diversity in the highly inbred Scandinavian wolf population
Source: HighWire-hosted journal article supplement (doi:10.1101/gr.276070.121), 2022-02-08
Supplement: Supplemental_Table_S1.xlsx [file Supplemental_Table_S1.xlsx]

## Sheet: S1
Supplemental Table S1. Summary of shared and homozygous 1 Mb haplotypes/windows in founder wolves.
Chr	No. of analysed windows	No. of homozygous windows within each founder			No. of male founder haplotypes identical to F		No. of M2 haplotypes identical to M1
		F	M1	M2	M1	M2
1	123	2	26	4	29	7	8
2	83	2	5	16	16	42	14
3	92	4	7	4	10	13	33
4	89	4	4	55	6	9	42
5	89	2	0	2	11	19	16
6	78	3	0	39	26	4	27
7	81	0	26	31	0	3	36
8	75	0	11	9	44	5	28
9	60	0	55	1	2	4	9
10	70	1	18	12	1	11	49
11	75	4	5	26	3	38	42
12	73	4	10	38	63	59	29
13	64	2	57	25	5	3	4
14	60	0	3	53	37	0	26
15	65	5	3	52	14	12	28
16	59	0	0	0	17	14	48
17	65	0	3	5	8	26	41
18	56	0	1	0	14	14	27
19	54	3	0	1	5	28	24
20	58	0	13	19	29	5	4
21	51	3	0	11	21	16	16
22	62	0	50	1	13	15	14
23	53	0	1	20	1	27	13
24	48	0	37	3	13	6	7
25	52	0	32	5	13	11	32
26	37	12	10	17	2	3	12
27	46	14	0	0	6	9	10
28	42	3	3	12	5	7	19
29	42	0	7	4	8	13	19
30	41	2	5	8	19	14	34
31	40	3	6	4	7	17	24
32	39	0	12	10	1	1	36
33	32	0	28	12	14	13	31
34	43	0	33	11	15	11	9
35	27	0	17	1	11	2	0
36	31	0	16	4	4	25	12
37	31	0	0	2	10	1	0
38	24	0	0	0	2	0	1
X	123 (see note below)	11	1	0	10	15	15
Total	2333 (see note below)	84	505	517	515	522	839
Abbreviations: F – female founder; M1 – first male founder; M2 – second male founder;
Note: Only 2217 windows ot the analyzed 2333 are diploid in males, as 116 windows of X chromosome in males have a single haplotype per window
