# Supplementary material for: Whole-genome resequencing of temporally stratified samples reveals substantial loss of haplotype diversity in the highly inbred Scandinavian wolf population
Source: HighWire-hosted journal article supplement (doi:10.1101/gr.276070.121), 2022-02-08
Supplement: Supplemental_Table_S2.xlsx [file Supplemental_Table_S2.xlsx]

## Sheet: S2
Supplemental Table S2. Pairwise comparison of 1 Mb haplotypes of the six founder chromosome-level haplotypes. Pairwise comparisons are given for each chromosome. Diagonal values provide the total number of analysed windows, values above the diagonal provide number of identical 1 Mb haplotypes and values below the diagonal represent the proportion of chromosome that was identical (%). Labels repre…
Chr 1	F_1	F_2	M1_1	M1_2	M2_1	M2_2
F_1	123	2	14	13	1	3
F_2	1.6	123	3	0	2	2
M1_1	11.3	2.4	123	26	1	2
M1_2	10.5	0	21.1	123	2	5
M2_1	0.8	1.6	0.8	1.6	123	4
M2_2	2.4	1.6	1.6	4.0	3.2	123
Chr 2	F_1	F_2	M1_1	M1_2	M2_1	M2_2
F_1	83	2	0	2	13	7
F_2	2.4	83	3	11	13	13
M1_1	0	3.6	83	5	9	1
M1_2	2.4	13.2	6.0	83	2	4
M2_1	15.6	15.6	10.8	2.4	83	16
M2_2	8.4	15.6	1.2	4.8	19.2	83
Chr 3	F_1	F_2	M1_1	M1_2	M2_1	M2_2
F_1	92	4	5	3	13	0
F_2	4.3	92	2	2	4	0
M1_1	5.4	2.1	92	7	28	0
M1_2	3.2	2.1	7.6	92	7	3
M2_1	14.1	4.3	30.4	7.6	92	4
M2_2	0	0	0	3.2	4.3	92
Chr 4	F_1	F_2	M1_1	M1_2	M2_1	M2_2
F_1	89	4	3	0	2	3
F_2	4.4	89	0	3	0	4
M1_1	3.3	0	89	4	0	2
M1_2	0	3.3	4.4	89	19	21
M2_1	2.2	0	0	21.3	89	55
M2_2	3.3	4.4	2.2	23.5	61.7	89
Chr 5	F_1	F_2	M1_1	M1_2	M2_1	M2_2
F_1	89	2	3	0	0	15
F_2	2.2	89	8	0	1	3
M1_1	3.3	8.9	89	0	0	11
M1_2	0	0	0	89	1	4
M2_1	0	1.1	0	1.1	89	2
M2_2	16.8	3.3	12.3	4.4	2.20	89
Chr 6	F_1	F_2	M1_1	M1_2	M2_1	M2_2
F_1	78	3	0	16	1	0
F_2	3.8	78	5	7	0	3
M1_1	0	6.4	78	0	13	7
M1_2	20.5	8.9	0	78	0	7
M2_1	1.2	0	16.6	0	78	39
M2_2	0	3.8	8.9	8.9	50. 0	78
Chr 7	F_1	F_2	M1_1	M1_2	M2_1	M2_2
F_1	81	0	0	0	1	1
F_2	0	81	0	0	0	1
M1_1	0	0	81	26	6	11
M1_2	0	0	32. 0	81	25	11
M2_1	1.2	0	7.4	30.8	81	31
M2_2	1.2	1.2	13.5	13.5	38.2	81
Chr 8	F_1	F_2	M1_1	M1_2	M2_1	M2_2
F_1	75	0	10	31	2	0
F_2	0	75	0	3	1	2
M1_1	13.3	0	75	11	15	1
M1_2	41.3	4. 0	14.6	75	7	6
M2_1	2.6	1.3	20. 0	9.3	75	9
M2_2	0	2.6	1.3	8. 0	12. 0	75
Chr 9	F_1	F_2	M1_1	M1_2	M2_1	M2_2
F_1	60	0	0	0	3	1
F_2	0	60	1	1	0	0
M1_1	0	1.6	60	55	1	8
M1_2	0	1.6	91.6	60	1	8
M2_1	5. 0	0	1.6	1.6	60	1
M2_2	1.6	0	13.3	13.3	1.6	60
Chr 10	F_1	F_2	M1_1	M1_2	M2_1	M2_2
F_1	70	1	0	1	0	9
F_2	1.4	70	0	1	0	2
M1_1	0	0	70	18	6	0
M1_2	1.4	1.4	25.7	70	40	6
M2_1	0	0	8.5	57.1	70	12
M2_2	12.8	2.8	0	8.5	17.1	70
Chr 11	F_1	F_2	M1_1	M1_2	M2_1	M2_2
F_1	75	4	0	1	0	1
F_2	5.3	75	1	2	5	33
M1_1	0	1.3	75	5	10	10
M1_2	1.3	2.6	6.6	75	12	16
M2_1	0	6.6	13.3	16. 0	75	26
M2_2	1.3	44. 0	13.3	21.3	34.6	75
Chr 12	F_1	F_2	M1_1	M1_2	M2_1	M2_2
F_1	73	4	16	12	3	9
F_2	5.4	73	38	0	17	32
M1_1	21.9	52. 0	73	10	10	24
M1_2	16.4	0	13.6	73	0	2
M2_1	4.1	23.2	13.6	0	73	38
M2_2	12.3	43.8	32.8	2.7	52. 0	73
Chr 13	F_1	F_2	M1_1	M1_2	M2_1	M2_2
F_1	64	2	1	1	1	0
F_2	3.1	64	1	2	1	1
M1_1	1.5	1.5	64	57	2	0
M1_2	1.5	3.1	89. 0	64	3	1
M2_1	1.5	1.5	3.1	4.6	64	25
M2_2	0	1.5	0	1.5	39. 0	64
Chr 14	F_1	F_2	M1_1	M1_2	M2_1	M2_2
F_1	60	0	5	17	0	0
F_2	0	60	15	0	0	0
M1_1	8.3	25. 0	60	3	0	0
M1_2	28.3	0	5. 0	60	16	10
M2_1	0	0	0	26.6	60	53
M2_2	0	0	0	16.6	88.3	60
Chr 15	F_1	F_2	M1_1	M1_2	M2_1	M2_2
F_1	65	5	0	13	0	0
F_2	7.6	65	1	1	3	9
M1_1	0	1.5	65	3	1	1
M1_2	20. 0	1.5	4.6	65	13	13
M2_1	0	4.6	1.5	20. 0	65	52
M2_2	0	13.8	1.5	20. 0	80. 0	65
Chr 16	F_1	F_2	M1_1	M1_2	M2_1	M2_2
F_1	59	0	9	8	9	4
F_2	0	59	0	0	0	1
M1_1	15.2	0	59	0	3	22
M1_2	13.5	0	0	59	23	0
M2_1	15.2	0	5. 0	38.9	59	0
M2_2	6.7	1.6	37.2	0	0	59
Chr 17	F_1	F_2	M1_1	M1_2	M2_1	M2_2
F_1	65	0	1	1	18	7
F_2	0	65	6	0	0	1
M1_1	1.5	9.2	65	3	15	25
M1_2	1.5	0	4.6	65	0	1
M2_1	27.6	0	23. 0	0	65	5
M2_2	10.7	1.5	38.4	1.5	7.6	65
Chr 18	F_1	F_2	M1_1	M1_2	M2_1	M2_2
F_1	56	0	1	10	0	10
F_2	0	56	3	0	2	2
M1_1	1.7	5.3	56	1	2	1
M1_2	17.8	0	1.7	56	0	27
M2_1	0	3.5	3.5	0	56	0
M2_2	17.8	3.5	1.7	48.2	0	56
Chr 19	F_1	F_2	M1_1	M1_2	M2_1	M2_2
F_1	54	3	0	2	3	3
F_2	5.5	54	3	0	0	23
M1_1	0	5.5	54	0	8	2
M1_2	3.7	0	0	54	0	14
M2_1	5.5	0	14.8	0	54	1
M2_2	5.5	42.5	3.7	25.9	1.8	54
Chr 20	F_1	F_2	M1_1	M1_2	M2_1	M2_2
F_1	58	0	2	2	0	0
F_2	0	58	5	20	5	0
M1_1	3.4	8.6	58	13	2	0
M1_2	3.4	34.4	22.4	58	2	0
M2_1	0	8.6	3.4	3.4	58	19
M2_2	0	0	0	0	32.7	58
Chr 21	F_1	F_2	M1_1	M1_2	M2_1	M2_2
F_1	51	3	14	7	6	0
F_2	5.8	51	0	0	0	10
M1_1	27.4	0	51	0	0	0
M1_2	13.7	0	0	51	1	15
M2_1	11.7	0	0	1.9	51	11
M2_2	0	19.6	0	29.4	21.5	51
Chr 22	F_1	F_2	M1_1	M1_2	M2_1	M2_2
F_1	62	0	0	0	0	0
F_2	0	62	7	6	4	11
M1_1	0	11.2	62	50	2	12
M1_2	0	9.6	80.6	62	0	12
M2_1	0	6.4	3.2	0	62	1
M2_2	0	17.7	19.3	19.3	1.6	62
Chr 23	F_1	F_2	M1_1	M1_2	M2_1	M2_2
F_1	53	0	1	0	0	0
F_2	0	53	0	0	15	12
M1_1	1.8	0	53	1	1	11
M1_2	0	0	1.8	53	0	1
M2_1	0	28.3	1.8	0	53	20
M2_2	0	22.6	20.7	1.8	37.7	53
Chr 24	F_1	F_2	M1_1	M1_2	M2_1	M2_2
F_1	48	0	2	2	0	5
F_2	0	48	0	9	1	0
M1_1	4.1	0	48	37	1	5
M1_2	4.1	18.7	77. 0	48	2	5
M2_1	0	2. 0	2. 0	4.1	48	3
M2_2	10.4	0	10.4	10.4	6.2	48
Chr 25	F_1	F_2	M1_1	M1_2	M2_1	M2_2
F_1	52	0	8	5	1	1
F_2	0	52	0	0	7	2
M1_1	15.3	0	52	32	11	5
M1_2	9.6	0	61.5	52	27	2
M2_1	1.9	13.4	21.1	51.9	52	5
M2_2	1.9	3.8	9.6	3.8	9.6	52
Chr 26	F_1	F_2	M1_1	M1_2	M2_1	M2_2
F_1	37	12	1	1	0	1
F_2	32.4	37	0	0	1	1
M1_1	2.7	0	37	10	5	7
M1_2	2.7	0	27. 0	37	1	1
M2_1	0	2.7	13.5	2.7	37	17
M2_2	2.7	2.7	18.9	2.7	45.9	37
Chr 27	F_1	F_2	M1_1	M1_2	M2_1	M2_2
F_1	46	14	4	0	4	0
F_2	30.4	46	6	0	5	0
M1_1	8.6	13. 0	46	0	3	5
M1_2	0	0	0	46	1	2
M2_1	8.6	10.8	6.5	2.1	46	0
M2_2	0	0	10.8	4.3	0	46
Chr 28	F_1	F_2	M1_1	M1_2	M2_1	M2_2
F_1	42	3	1	0	6	0
F_2	7.1	42	3	2	0	1
M1_1	2.3	7.1	42	3	1	5
M1_2	0	4.7	7.1	42	8	7
M2_1	14.2	0	2.3	19. 0	42	12
M2_2	0	2.3	11.9	16.6	28.5	42
Chr 29	F_1	F_2	M1_1	M1_2	M2_1	M2_2
F_1	42	0	1	5	1	9
F_2	0	42	2	0	3	0
M1_1	2.3	4.7	42	7	14	5
M1_2	11.9	0	16.6	42	0	0
M2_1	2.3	7.1	33.3	0	42	4
M2_2	21.4	0	11.9	0	9.5	42
Chr 30	F_1	F_2	M1_1	M1_2	M2_1	M2_2
F_1	41	2	8	2	8	0
F_2	4.8	41	6	6	4	3
M1_1	19.5	14.6	41	5	25	9
M1_2	4.8	14.6	12.1	41	2	2
M2_1	19.5	9.7	60.9	4.8	41	8
M2_2	0	7.3	21.9	4.8	19.5	41
Chr 31	F_1	F_2	M1_1	M1_2	M2_1	M2_2
F_1	40	3	4	3	6	1
F_2	7.5	40	2	0	11	0
M1_1	10. 0	5. 0	40	6	3	4
M1_2	7.5	0	15. 0	40	1	21
M2_1	15. 0	27.5	7.5	2.5	40	4
M2_2	2.5	0	10. 0	52.5	10. 0	40
Chr 32	F_1	F_2	M1_1	M1_2	M2_1	M2_2
F_1	39	0	0	0	0	0
F_2	0	39	0	1	0	1
M1_1	0	0	39	12	13	23
M1_2	0	2.5	30.7	39	0	1
M2_1	0	0	33.3	0	39	10
M2_2	0	2.5	58.9	2.5	25.6	39
Chr 33	F_1	F_2	M1_1	M1_2	M2_1	M2_2
F_1	32	0	7	7	8	5
F_2	0	32	0	0	0	0
M1_1	21.8	0	32	28	9	22
M1_2	21.8	0	87.5	32	9	18
M2_1	25. 0	0	28.1	28.1	32	12
M2_2	15.6	0	68.7	56.2	37.5	32
Chr 34	F_1	F_2	M1_1	M1_2	M2_1	M2_2
F_1	43	0	8	7	10	0
F_2	0	43	0	0	0	1
M1_1	18.6	0	43	33	4	5
M1_2	16.2	0	76.7	43	2	5
M2_1	23.2	0	9.3	4.6	43	11
M2_2	0	2.3	11.6	11.6	25.5	43
Chr 35	F_1	F_2	M1_1	M1_2	M2_1	M2_2
F_1	27	0	5	5	1	1
F_2	0	27	0	1	0	0
M1_1	18.5	0	27	17	0	0
M1_2	18.5	3.7	62.9	27	0	0
M2_1	3.7	0	0	0	27	1
M2_2	3.7	0	0	0	3.7	27
Chr 36	F_1	F_2	M1_1	M1_2	M2_1	M2_2
F_1	31	0	0	0	2	0
F_2	0	31	0	4	1	22
M1_1	0	0	31	16	9	2
M1_2	0	12.9	51.6	31	2	4
M2_1	6.4	3.2	29. 0	6.4	31	4
M2_2	0	70.9	6.4	12.9	12.9	31
Chr 37	F_1	F_2	M1_1	M1_2	M2_1	M2_2
F_1	31	0	6	4	1	0
F_2	0	31	0	0	0	0
M1_1	19.3	0	31	0	0	0
M1_2	12.9	0	0	31	0	0
M2_1	3.2	0	0	0	31	2
M2_2	0	0	0	0	6.4	31
Chr 38	F_1	F_2	M1_1	M1_2	M2_1	M2_2
F_1	24	0	0	0	0	0
F_2	0	24	2	0	0	0
M1_1	0	8.3	24	0	0	1
M1_2	0	0	0	24	0	0
M2_1	0	0	0	0	24	0
M2_2	0	0	4.1	0	0	24
PAR	F_1	F_2	M1_1	M1_2	M2_1	M2_2
F_1	6	0	0	0	0	0
F_2	0	6	0	0	0	0
M1_1	0	0	6	1	0	0
M1_2	0	0	16.6	6	0	0
M2_1	0	0	0	0	6	0
M2_2	0	0	0	0	0	6
Chr X	F_1	F_2	M1_1	M2_1
F_1	116	11	7	4
F_2	9.4	116	5	11
M1_1	6. 0	4.3	116	16
M2_1	3.4	9.4	13.7	116
