# Supplementary material for: Whole-genome resequencing of temporally stratified samples reveals substantial loss of haplotype diversity in the highly inbred Scandinavian wolf population
Source: HighWire-hosted journal article supplement (doi:10.1101/gr.276070.121), 2022-02-08
Supplement: Supplemental_Table_S3.xlsx [file Supplemental_Table_S3.xlsx]

## Sheet: S3
Supplemental Table S3. Temporal loss of 1 Mb haplotypes from the diploid founder genomes.
Chr	Female founder			First male founder		Second male founder
	1983-1993	1994-2006	2006-2014	1994-2006	2006-2014	1994-2006	2006-2014
1	11	106	141	37	39	50	50
2	15	50	58	49	55	21	30
3	0	30	32	0	0	14	0
4	0	0	22	0	0	3	27
5	19	57	58	9	9	35	3
6	0	48	67	16	16	33	39
7	16	81	81	19	78	1	0
8	0	0	0	29	39	15	37
9	0	22	25	0	0	0	0
10	11	51	51	0	47	18	5
11	0	3	3	3	8	4	0
12	43	43	57	0	7	0	0
13	0	15	15	0	0	27	0
14	0	0	8	15	54	0	0
15	0	0	20	28	55	0	0
16	0	10	10	5	30	0	6
17	31	55	59	67	68	0	0
18	0	45	39	7	9	0	0
19	7	12	13	18	20	0	0
20	0	0	1	6	6	0	13
21	0	33	54	15	15	0	21
22	0	5	5	10	0	0	43
23	0	35	42	0	26	3	3
24	0	0	0	0	0	9	9
25	8	8	22	0	0	52	53
26	0	10	10	7	7	3	0
27	0	2	0	0	0	2	24
28	0	0	25	10	27	25	25
29	0	0	0	33	33	29	36
30	0	5	8	1	1	1	11
31	0	6	14	0	0	9	34
32	0	6	6	25	25	0	0
33	0	17	17	4	4	11	0
34	0	0	0	11	3	2	0
35	0	11	11	2	2	0	7
36	0	0	0	16	16	0	3
37	0	24	24	0	0	0	0
38	0	25	29	6	6	1	0
X	0	72	96	0	1	4	2
Total	161	887	1123	448	706	372	481
