# Supplementary material for: Whole-genome resequencing of temporally stratified samples reveals substantial loss of haplotype diversity in the highly inbred Scandinavian wolf population
Source: HighWire-hosted journal article supplement (doi:10.1101/gr.276070.121), 2022-02-08
Supplement: Supplemental_Table_S4.xlsx [file Supplemental_Table_S4.xlsx]

## Sheet: S4
Supplemental Table S4. Partitioning of lost 1 Mb haplotypes according to the presence/absence pattern across temporal samples.
No. of 1 Mb haplotypes	Founder	1983-1993	1994-2005	2006-2014
156	Female founder	absent	absent	absent
3	Female founder	absent	absent	present
2	Female founder	absent	present	present
0	Female founder	absent	present	absent
13	Female founder	present	absent	present
715	Female founder	present	absent	absent
252	Female founder	present	present	absent
422	First male founder	NA	absent	absent
284	First male founder	NA	present	absent
26	First male founder	NA	absent	present
251	Second male founder	NA	absent	absent
230	Second male founder	NA	present	absent
121	Second male founder	NA	absent	present
NA – values that were not available due to lack of sequence data from male founders.
