# Supplementary material for: Whole-genome resequencing of temporally stratified samples reveals substantial loss of haplotype diversity in the highly inbred Scandinavian wolf population
Source: HighWire-hosted journal article supplement (doi:10.1101/gr.276070.121), 2022-02-08
Supplement: Supplemental_Table_S5.xlsx [file Supplemental_Table_S5.xlsx]

## Sheet: S5
Supplemental Table S5. Temporal loss of the SNP alleles from the female founder.
Chr	No. of SNPs	Absent	Absent	Absent
		1983-1993	1994-2006	2006-2014
1	105053	537	10102	13870
2	55839	816	4911	6125
3	64270	0	1668	1732
4	60460	1	2	2046
5	69682	1252	4590	4164
6	49973	0	5596	7303
7	55095	1113	7985	8720
8	45532	0	1	9
9	40512	0	1885	1969
10	45134	1072	4403	5513
11	46733	1	570	723
12	37987	1437	1436	1476
13	40629	0	1148	1151
14	34721	1	56	1209
15	36355	0	3	423
16	39724	0	573	621
17	47091	3306	5477	5891
18	38904	0	4338	3777
19	35019	519	747	884
20	39036	0	0	27
21	32131	1	673	1176
22	37110	0	521	524
23	36084	0	3722	5485
24	31321	0	1	1
25	31846	51	268	2724
26	25789	0	1005	1004
27	27585	0	77	34
28	28725	0	1	1669
29	27587	0	5	60
30	23531	0	433	454
31	23128	0	77	964
32	24136	0	796	769
33	18292	0	2433	2013
34	28677	0	0	0
35	21223	1	801	869
36	18359	0	0	108
37	23878	0	2084	2155
38	20941	0	2019	2608
X	11813	0	1181	1516
Total	1479905	10108	71588	91766
