# Supplementary material for: Whole-genome resequencing of temporally stratified samples reveals substantial loss of haplotype diversity in the highly inbred Scandinavian wolf population
Source: HighWire-hosted journal article supplement (doi:10.1101/gr.276070.121), 2022-02-08
Supplement: Supplemental_Table_S6.xlsx [file Supplemental_Table_S6.xlsx]

## Sheet: S6
Supplemental Table S6. Temporal loss of SNP alleles of male founders.
Chr	Inferred allele contribution			Absent in 1994-2005			Absent in 2006-2014
	M1 unique	M2 unique	M1 and M2 shared	M1 unique	M2 unique	M1 and M2 shared	M1 unique	M2 unique	M1 and M2 shared
1	7579	23031	26049	2338	4810	429	2744	4829	440
2	5570	9177	14967	2888	1528	91	2933	2115	218
3	4281	11196	19606	17	42	0	18	91	0
4	6271	8199	18170	12	171	0	12	2304	0
5	5710	13862	19386	464	3216	155	466	118	0
6	5052	7660	13638	778	1059	402	780	1381	408
7	2579	9187	15653	257	392	101	1450	359	1019
8	3591	10235	9411	1269	1500	122	2116	1380	129
9	227	11996	8775	4	74	0	5	128	1
10	3931	6171	12364	12	1219	0	1990	585	141
11	4796	4856	14646	130	98	41	965	4	0
12	6357	4988	5568	13	1	2	152	1	2
13	440	9250	10661	14	478	0	11	5	0
14	4133	4467	7697	699	3	0	4118	2	2
15	4558	3874	11296	1918	0	0	3996	0	1
16	1886	5665	12164	337	2	1	989	174	0
17	1312	5090	16960	1309	16	270	1307	30	496
18	3912	6376	9470	267	2	0	413	2	0
19	3563	7711	7414	6	527	1	600	496	1
20	3292	7595	8131	468	34	0	473	1	0
21	2288	4963	9431	5	12	0	4	587	456
22	834	7956	8598	588	4	0	11	2676	0
23	3307	4117	11401	5	0	0	2218	0	0
24	59	8231	7229	7	1142	1	7	1142	1
25	650	6565	7693	11	4720	1	12	4770	1
26	2167	3814	10932	401	282	7	499	2	2
27	1757	5512	11236	7	163	0	12	1160	3
28	2500	3894	9501	452	244	2	517	204	95
29	1218	3791	8952	1095	478	1395	1050	1163	1394
30	791	4319	7300	141	8	0	141	522	0
31	1168	2737	8554	5	463	1	5	1264	1
32	2838	3378	6308	2657	0	0	2654	1	0
33	293	2659	4524	288	955	0	290	2	0
34	818	6868	6520	7	19	495	7	59	103
35	560	5553	5055	33	1	0	33	668	0
36	911	2496	5006	679	0	0	680	7	3
37	1829	4790	5506	5	13	0	9	82	0
38	1509	3946	5847	402	2	0	488	146	24
X	340	2016	3526	14	392	1	14	275	1
Total	104877	258191	405145	20002	24070	3518	34189	28735	4942
