# Supplementary material for: Whole-genome resequencing of temporally stratified samples reveals substantial loss of haplotype diversity in the highly inbred Scandinavian wolf population
Source: HighWire-hosted journal article supplement (doi:10.1101/gr.276070.121), 2022-02-08
Supplement: Supplemental_Table_S7.xlsx [file Supplemental_Table_S7.xlsx]

## Sheet: S7
Supplemental Table S7. Partitioning of SNPs according to the presence/absence pattern across temporal samples.
No. of alleles	Founder	1983-1993	1994-2005	2006-2014
10033	Female founder	absent	absent	absent
12	Female founder	absent	absent	present
58	Female founder	absent	present	present
5	Female founder	absent	present	absent
2279	Female founder	present	absent	present
59264	Female founder	present	absent	absent
22464	Female founder	present	present	absent
19316	First male founder	NA	absent	absent
14873	First male founder	NA	present	absent
686	First male founder	NA	absent	present
17195	Second male founder	NA	absent	absent
11540	Second male founder	NA	present	absent
6875	Second male founder	NA	absent	present
2890	Shared male founder	NA	absent	absent
2052	Shared male founder	NA	present	absent
628	Shared male founder	NA	absent	present
NA – values that were not available due to lack of sequence data from male founders.
