# Supplementary material for: Whole-genome resequencing of temporally stratified samples reveals substantial loss of haplotype diversity in the highly inbred Scandinavian wolf population
Source: HighWire-hosted journal article supplement (doi:10.1101/gr.276070.121), 2022-02-08
Supplement: Supplemental_Table_S8.xlsx [file Supplemental_Table_S8.xlsx]

## Sheet: S8
Supplemental Table S8. Sample information for the analysed wolves.
SLU_ID	Birthyear	Sex	Temporal sample	Accession
D-85-01	unknown	female	Female founder	SAMEA104091007
D-84-03	1983 c	male	1983-1993	SAMEA104091006
D-85-02	1984 c	male	1983-1993	SAMEA104091008
D-86-01	1983 bc	male	1983-1993	SAMEA104091009
D-89-01	1987ab	male	1983-1993	SAMEA104091010
D-91-01	1987 b	female	1983-1993	SAMEA104091012
D-89-03	1989 c	female	1983-1993	SAMEA104091011
D-92-05	1988-1990 b	male	1983-1993	SAMEA104091015
D-93-02	1988 a	female	1983-1993	SAMEA104091018
M-98-02	1991 b	male	1983-1993	SAMEA104091069
D-93-03	1991 ab	female	1983-1993	SAMEA104091019
D-94-01	1992 ab	female	1983-1993	SAMEA104091020
D-92-06	1992 b	male	1983-1993	SAMEA104091016
D-92-01	1991-1992 b	male	1983-1993	SAMEA104091013
D-96-01	1992 a	male	1983-1993	SAMEA104091021
D-92-02	1991 a	male	1983-1993	SAMEA104091014
D-93-01	1992 ac	male	1983-1993	SAMEA104091017
D-92-03	1991 a	male	1983-1993	SAMEA8718190
D-99-02	1991 a	male	1983-1993	SAMEA104091022
M-98-03	1991-1992 b	female	1983-1993	SAMEA104091070
M-01-09	1996-1997 a	male	1994-2005	SAMEA8718192
D-00-15	1994-1996 b	male	1994-2005	SAMEA104090976
M-01-04	1993-1994 b	female	1994-2005	SAMEA104091050
M-00-09	1994-1996 b	male	1994-2005	SAMEA104091048
M-01-10	1997-2000 b	female	1994-2005	SAMEA104091052
M-03-07	1997-2000 b	female	1994-2005	SAMEA104091055
G9-05	2001-2003 b	male	1994-2005	SAMEA104091046
D-01-18	1994-1996 b	male	1994-2005	SAMEA104090977
M-01-06	2000 b	female	1994-2005	SAMEA104091051
M-98-08	1998 c	male	1994-2005	SAMEA104091071
M-03-06	2001 c	male	1994-2005	SAMEA104091054
D-05-23	1997-2001 b	male	1994-2005	SAMEA104090979
D-06-16	2000 a	female	1994-2005	SAMEA104090981
M-00-10	1999 ab	male	1994-2005	SAMEA104091049
D-00-12	1999 c	female	1994-2005	SAMEA104090975
M-98-01	1998 ab	female	1994-2005	SAMEA104091068
D-11-19	2004 a	male	1994-2005	SAMEA8718191
D-10-20	2003 a	female	1994-2005	SAMEA104090993
D-10-30	2005 a	male	1994-2005	SAMEA104090996
D-06-14	2004 a	female	1994-2005	SAMEA104090980
M-06-03	2005 c	male	1994-2005	SAMEA104091058
M-06-04	2005 c	female	1994-2005	SAMEA104091059
D-07-28	2002-2005 ab	male	1994-2005	SAMEA104090986
D-08-10	2002-2006 b	female	1994-2005	SAMEA104090988
M-09-17	2001-2004 b	male	1994-2005	SAMEA104091064
D-08-20	2005 ab	male	1994-2005	SAMEA104090990
M-05-07	2004 b	female	1994-2005	SAMEA104091057
M-09-05	2004-2006 b	male	1994-2005	SAMEA104091063
D-11-17	2006 a	female	2006-2014	SAMEA104091001
D-10-29	2006 a	male	2006-2014	SAMEA104090995
D-07-24	2006 c	female	2006-2014	SAMEA104090985
D-08-21	2007 ab	male	2006-2014	SAMEA104090991
D-07-09	2006 c	male	2006-2014	SAMEA104090984
D-07-17	2006 c	female	2006-2014	SAMEA104090982
D-08-08	2006-2007 b	female	2006-2014	SAMEA104090987
M-07-06	2006 b	male	2006-2014	SAMEA104091061
D-07-16	2002-2006 b	male	2006-2014	SAMEA104090983
D-08-19	2007 a	female	2006-2014	SAMEA104090989
G34-10	2007-2009 b	female	2006-2014	SAMEA104091038
G110-11	2010-2011 b	female	2006-2014	SAMEA104091027
G97-13	2007-2012 b	male	2006-2014	SAMEA104091047
G174-13	2013 c	female	2006-2014	SAMEA104091031
D-10-68	2007-2008 b	male	2006-2014	SAMEA104091000
D-10-15	2009 c	female	2006-2014	SAMEA104090992
D-10-44	2008 a	male	2006-2014	SAMEA104090997
D-10-23	2008 a	female	2006-2014	SAMEA104090994
G58-15	2014 bc	female	2006-2014	SAMEA104091042
D-11-22	2009 bc	female	2006-2014	SAMEA104091002
G87-12	2012 (fetus)	female	2006-2014	SAMEA104091045
D-11-58	2008-2010 b	female	2006-2014	SAMEA104091003
G126-13	2011 b	male	2006-2014	SAMEA104091029
G50-12	2010-2011 b	male	2006-2014	SAMEA104091041
G24-14	2013 b	female	2006-2014	SAMEA104091034
G175-13	2010-2013 b	male	2006-2014	SAMEA104091032
G32-12	2007-2011 b	male	2006-2014	SAMEA104091036
D-10-50	2008 a	male	2006-2014	SAMEA104090998
Birth year estimated: a by cementum ageing; b based on years of parental reproduction;
c morphological data.
